# Supplementary material
Source: PubMed Central journal article supplement (PMC7105086)

# Supporting Information

## Table of contents:

|                                                                                                                                |    |
|--------------------------------------------------------------------------------------------------------------------------------|----|
| <b>General Information</b> .....                                                                                               | 5  |
| Table S1. MIC values of PTM and selected variants against selected pathogens.....                                              | 6  |
| Figure S1. Structures of the ADHBA variants of platensimycin.....                                                              | 8  |
| Figure S2. Paper Disc Method.....                                                                                              | 9  |
| Figure S3. Analysis of the stability of <b>8</b> from LB agar.....                                                             | 11 |
| <b>Experimental procedure and physical data</b> .....                                                                          | 12 |
| <b>References</b> .....                                                                                                        | 37 |
| <b>NMR spectra data of products</b> .....                                                                                      | 39 |
| Figure S4. <sup>1</sup> H NMR (400 MHz) and <sup>13</sup> C NMR (101 MHz) for <b>7a</b> in CDCl <sub>3</sub> .....             | 39 |
| Figure S5. <sup>1</sup> H NMR (500 MHz) and <sup>13</sup> C NMR (126 MHz) for <b>7b</b> in DMSO- <i>d</i> <sub>6</sub> .....   | 40 |
| Figure S6. <sup>1</sup> H- <sup>13</sup> C HSQC spectrum of <b>7b</b> in DMSO- <i>d</i> <sub>6</sub> .....                     | 41 |
| Figure S7. <sup>1</sup> H NMR (500 MHz) and <sup>13</sup> C NMR (126 MHz) for <b>8</b> in DMSO- <i>d</i> <sub>6</sub> .....    | 42 |
| Figure S8. <sup>1</sup> H- <sup>13</sup> C HSQC spectrum of <b>8</b> in DMSO- <i>d</i> <sub>6</sub> .....                      | 43 |
| Figure S9. <sup>1</sup> H NMR (500 MHz) and <sup>13</sup> C NMR (126 MHz) for <b>9</b> in MeOD.....                            | 44 |
| Figure S10. <sup>1</sup> H NMR (400 MHz) and <sup>13</sup> C NMR (101 MHz) for <b>10a</b> in DMSO- <i>d</i> <sub>6</sub> ..... | 45 |
| Figure S11. <sup>1</sup> H- <sup>13</sup> C HSQC spectrum of <b>10a</b> in DMSO- <i>d</i> <sub>6</sub> .....                   | 46 |
| Figure S12. <sup>1</sup> H NMR (400 MHz) and <sup>13</sup> C NMR (101 MHz) for <b>10b</b> in DMSO- <i>d</i> <sub>6</sub> ..... | 47 |
| Figure S13. <sup>1</sup> H- <sup>13</sup> C HSQC spectrum of <b>10b</b> in DMSO- <i>d</i> <sub>6</sub> .....                   | 48 |
| Figure S14. <sup>1</sup> H NMR (400 MHz) and <sup>13</sup> C NMR (101 MHz) for <b>25a</b> in CDCl <sub>3</sub> .....           | 49 |
| Figure S15. <sup>1</sup> H NMR (400 MHz) and <sup>13</sup> C NMR (101 MHz) for <b>26a</b> in CDCl <sub>3</sub> .....           | 50 |
| Figure S16. <sup>1</sup> H NMR (400 MHz) and <sup>13</sup> C NMR (101 MHz) for <b>26b</b> in MeOD.....                         | 51 |
| Figure S17. <sup>1</sup> H NMR (400 MHz) and <sup>13</sup> C NMR (101 MHz) for <b>27a</b> in CDCl <sub>3</sub> .....           | 52 |
| Figure S18. <sup>1</sup> H NMR (500 MHz) and <sup>13</sup> C NMR (126 MHz) for <b>27b</b> in CDCl <sub>3</sub> .....           | 53 |
| Figure S19. <sup>1</sup> H NMR (500 MHz) and <sup>13</sup> C NMR (126 MHz) for <b>28</b> in DMSO- <i>d</i> <sub>6</sub> .....  | 54 |
| Figure S20. <sup>1</sup> H NMR (400 MHz) and <sup>13</sup> C NMR (101 MHz) for <b>29a</b> in CDCl <sub>3</sub> .....           | 55 |
| Figure S21. <sup>1</sup> H NMR (500 MHz) and <sup>13</sup> C NMR (126 MHz) for <b>29b</b> in CDCl <sub>3</sub> .....           | 56 |
| Figure S22. <sup>1</sup> H NMR (400 MHz) and <sup>13</sup> C NMR (101 MHz) for <b>30</b> in CDCl <sub>3</sub> .....            | 57 |
| Figure S23. <sup>1</sup> H NMR (500 MHz) and <sup>13</sup> C NMR (126 MHz) for <b>25b</b> in DMSO- <i>d</i> <sub>6</sub> ..... | 58 |
| Figure S24. <sup>1</sup> H NMR (500 MHz) and <sup>13</sup> C NMR (126 MHz) for <b>27c</b> in DMSO- <i>d</i> <sub>6</sub> ..... | 59 |

|                                                                                                                    |    |
|--------------------------------------------------------------------------------------------------------------------|----|
| Figure S25. $^1\text{H}$ NMR (400 MHz) and $^{13}\text{C}$ NMR (101 MHz) for <b>29c</b> in MeOD.....               | 60 |
| Figure S26. $^1\text{H}$ NMR (400 MHz) and $^{13}\text{C}$ NMR (101 MHz) for <b>4</b> in $\text{CDCl}_3$ .....     | 61 |
| Figure S27. $^1\text{H}$ NMR (400 MHz) and $^{13}\text{C}$ NMR (101 MHz) for <b>5</b> in $\text{CDCl}_3$ .....     | 62 |
| Figure S28. $^1\text{H}$ NMR (400 MHz) and $^{13}\text{C}$ NMR (101 MHz) for <b>S9</b> in $\text{DMSO-}d_6$ .....  | 63 |
| Figure S29. $^1\text{H}$ NMR (400 MHz) and $^{13}\text{C}$ NMR (101 MHz) for <b>6</b> in $\text{CDCl}_3$ .....     | 64 |
| Figure S30. $^1\text{H}$ NMR (400 MHz) and $^{13}\text{C}$ NMR (101 MHz) for <b>13</b> in $\text{CDCl}_3$ .....    | 65 |
| Figure S31. $^1\text{H}$ NMR (400 MHz) and $^{13}\text{C}$ NMR (101 MHz) for <b>15a</b> in $\text{CDCl}_3$ .....   | 66 |
| Figure S32. $^1\text{H}$ NMR (500 MHz) and $^{13}\text{C}$ NMR (126 MHz) for <b>15b</b> in $\text{DMSO-}d_6$ ..... | 67 |
| Figure S33. $^1\text{H}$ NMR (400 MHz) and $^{13}\text{C}$ NMR (101 MHz) for <b>17a</b> in $\text{CDCl}_3$ .....   | 68 |
| Figure S34. $^1\text{H}$ NMR (400 MHz) and $^{13}\text{C}$ NMR (101 MHz) for <b>17b</b> in $\text{CDCl}_3$ .....   | 69 |
| Figure S35. $^1\text{H}$ NMR (400 MHz) and $^{13}\text{C}$ NMR (101 MHz) for <b>19</b> in $\text{CDCl}_3$ .....    | 70 |
| Figure S36. $^1\text{H}$ NMR (400 MHz) and $^{13}\text{C}$ NMR (101 MHz) for <b>21b</b> in $\text{CDCl}_3$ .....   | 71 |
| Figure S37. $^1\text{H}$ NMR (400 MHz) and $^{13}\text{C}$ NMR (101 MHz) for <b>24</b> in $\text{CDCl}_3$ .....    | 72 |
| Figure S38. $^1\text{H}$ NMR (400 MHz) and $^{13}\text{C}$ NMR (101 MHz) for <b>12</b> in $\text{CDCl}_3$ .....    | 73 |
| Figure S39. $^1\text{H}$ NMR (400 MHz) and $^{13}\text{C}$ NMR (101 MHz) for <b>14</b> in $\text{CDCl}_3$ .....    | 74 |
| Figure S40. $^1\text{H}$ NMR (500 MHz) and $^{13}\text{C}$ NMR (126 MHz) for <b>23</b> in $\text{CDCl}_3$ .....    | 75 |
| Figure S41. $^1\text{H}$ NMR (400 MHz) and $^{13}\text{C}$ NMR (101 MHz) for <b>S8</b> in $\text{CDCl}_3$ .....    | 76 |
| Figure S42. $^1\text{H}$ NMR (400 MHz) and $^{13}\text{C}$ NMR (101 MHz) for <b>S10</b> in $\text{CDCl}_3$ .....   | 77 |
| Figure S43. $^1\text{H}$ NMR (400 MHz) and $^{13}\text{C}$ NMR (101 MHz) for <b>S11</b> in $\text{CDCl}_3$ .....   | 78 |
| Figure S44. $^1\text{H}$ NMR (400 MHz) and $^{13}\text{C}$ NMR (101 MHz) for <b>18</b> in MeOD.....                | 79 |
| Figure S45. $^1\text{H}$ NMR (400 MHz) and $^{13}\text{C}$ NMR (101 MHz) for <b>S13</b> in $\text{DMSO-}d_6$ ..... | 80 |
| Figure S46. $^1\text{H}$ NMR (400 MHz) and $^{13}\text{C}$ NMR (101 MHz) for <b>S15</b> in $\text{DMSO-}d_6$ ..... | 81 |
| Figure S47. $^1\text{H}$ NMR (400 MHz) and $^{13}\text{C}$ NMR (101 MHz) for <b>S18</b> in $\text{CDCl}_3$ .....   | 82 |
| Figure S48. $^1\text{H}$ NMR (400 MHz) and $^{13}\text{C}$ NMR (101 MHz) for <b>s-4f</b> in MeOD.....              | 83 |
| Figure S49. $^1\text{H}$ - $^{13}\text{C}$ HSQC spectrum of <b>s-4f</b> in MeOD.....                               | 84 |
| Figure S50. $^1\text{H}$ NMR (400 MHz) and $^{13}\text{C}$ NMR (101 MHz) for <b>s-4h</b> in MeOD.....              | 85 |
| Figure S51. $^1\text{H}$ - $^{13}\text{C}$ HSQC spectrum of <b>s-4h</b> in MeOD.....                               | 86 |
| Figure S52. HRMS spectrum of <b>7a</b> .....                                                                       | 87 |
| Figure S53. HRMS spectrum of <b>7b</b> .....                                                                       | 87 |
| Figure S54. HRMS spectrum of <b>8</b> .....                                                                        | 88 |
| Figure S55. HRMS spectrum of <b>9</b> .....                                                                        | 88 |
| Figure S56. HRMS spectrum of <b>10a</b> .....                                                                      | 89 |
| Figure S57. HRMS spectrum of <b>10b</b> .....                                                                      | 89 |
| Figure S58. HRMS spectrum of <b>25a</b> .....                                                                      | 90 |
| Figure S59. HRMS spectrum of <b>26a</b> .....                                                                      | 90 |
| Figure S60. HRMS spectrum of <b>26b</b> .....                                                                      | 91 |
| Figure S61. HRMS spectrum of <b>27a</b> .....                                                                      | 91 |
| Figure S62. HRMS spectrum of <b>27b</b> .....                                                                      | 92 |
| Figure S63. HRMS spectrum of <b>28</b> .....                                                                       | 92 |
| Figure S64. HRMS spectrum of <b>29a</b> .....                                                                      | 93 |
| Figure S65. HRMS spectrum of <b>29b</b> .....                                                                      | 93 |
| Figure S66. HRMS spectrum of <b>30</b> .....                                                                       | 94 |
| Figure S67. HRMS spectrum of <b>25b</b> .....                                                                      | 94 |

|                                                |     |
|------------------------------------------------|-----|
| Figure S68. HRMS spectrum of <b>27c</b> .....  | 95  |
| Figure S69. HRMS spectrum of <b>29c</b> .....  | 95  |
| Figure S70. HRMS spectrum of <b>5</b> .....    | 96  |
| Figure S71. HRMS spectrum of <b>6</b> .....    | 96  |
| Figure S72. HRMS spectrum of <b>13</b> .....   | 97  |
| Figure S73. HRMS spectrum of <b>15a</b> .....  | 97  |
| Figure S74. HRMS spectrum of <b>15b</b> .....  | 98  |
| Figure S75. HRMS spectrum of <b>17a</b> .....  | 98  |
| Figure S76. HRMS spectrum of <b>17b</b> .....  | 99  |
| Figure S77. HRMS spectrum of <b>19</b> .....   | 99  |
| Figure S78. HRMS spectrum of <b>21a</b> .....  | 100 |
| Figure S79. HRMS spectrum of <b>21b</b> .....  | 100 |
| Figure S80. HRMS spectrum of <b>24</b> .....   | 101 |
| Figure S81. HRMS spectrum of <b>s-4f</b> ..... | 101 |
| Figure S82. HRMS spectrum of <b>s-4h</b> ..... | 102 |



## General Information

All commercially available reagents were directly used as received from vendors, unless otherwise stated. Anhydrous THF (tetrahydrofuran) and DMF (*N,N*-dimethylformamide) freshly distilled over metal sodium, prior to use. NMR spectra were recorded on either Bruker 400 MHz or 500 MHz spectrometer. All NMR spectra were measured in CDCl<sub>3</sub>, MeOD or DMSO-*d*<sub>6</sub> solutions and referenced to the residual CHCl<sub>3</sub> signal (<sup>1</sup>H, d= 7.26 ppm; <sup>13</sup>C, d=77.16 ppm), MeOH signal (<sup>1</sup>H, d=3.31 ppm; <sup>13</sup>C, d=49.00 ppm) or DMSO-*d*<sub>6</sub> signal (<sup>1</sup>H, d= 2.50 ppm; <sup>13</sup>C, d= 39.52 ppm). All <sup>1</sup>H and <sup>13</sup>C shifts are given in ppm (s=singlet; d=doublet; t=triplet; q=quadruplet; m=multiplet; b=broad signal). High resolution mass spectra (HRMS) were performed with a Bruker ULTRAFLEX III TOF/TOF 200 instrument.

## Antibacterial activity assay<sup>[1]</sup>

The antibacterial activities of the five compounds were tested against *S. aureus* strains. MIC values of tested compounds were determined using agar dilution assay. In brief, the *S. aureus* strains were cultivated on LB broth overnight and diluted. Approximate 10<sup>4</sup> colony forming units (CFU) of each strain was spotted (2 μL) onto LB agar plates containing different concentration of the tested compounds, ranging from 0.5 - 64 μg/mL LB agar. Then the plates were incubated in 37 °C for 16 hours and monitored. The *S. aureus* strains were cultivated on LB broth overnight and diluted to an OD<sub>600</sub> = 0.25 ± 0.05, then diluted 10<sup>4</sup> with LB broth, and approximate 10<sup>4</sup> CFU of each strain was spotted (2 μL) onto LB agar plates.

**Table S1.** MIC values ( $\mu\text{g/ml}$ ) of PTM (**1**) and selected variants against selected Gram-positive pathogens. (i) black: isolated from wild-type; (ii) purple: isolated from engineered strains; (iii) blue: from semisynthesis; (iv) red: from total synthesis; (v) green: from mutasynthesis.

| Compound    | MSSA <sup>a</sup> | MRSA <sup>b</sup> | VRE <sup>c</sup> | Reference |
|-------------|-------------------|-------------------|------------------|-----------|
| <b>1</b>    | 0.5               | 0.5-1             | 0.1              | [2]       |
| <b>s-2a</b> | >64               | 37-58             | >58-64           | [3]       |
| <b>s-2b</b> | >64               | - <sup>d</sup>    | -                | [3]       |
| <b>s-2c</b> | >64               | -                 | >64              | [3]       |
| <b>s-2d</b> | >64               | -                 | >64              | [3]       |
| <b>s-2e</b> | 100               | -                 | -                | [4]       |
| <b>s-2f</b> | >64               | -                 | -                | [4]       |
| <b>s-2g</b> | >64               | -                 | -                | [5]       |
| <b>s-2h</b> | >64               | -                 | -                | [5]       |
| <b>s-2i</b> | >64               | -                 | >64              | [6]       |
| <b>s-2j</b> | >64               | -                 | -                | [4]       |
| <b>s-2k</b> | >250              | -                 | -                | [7]       |
| <b>s-2l</b> | >250              | -                 | -                | [7]       |
| <b>s-2m</b> | >64               | -                 | -                | [3]       |
| <b>s-3a</b> | -                 | >85               | >85              | [8]       |
| <b>s-3b</b> | -                 | >85               | >85              | [8]       |
| <b>s-3c</b> | -                 | >82               | >82              | [8-9]     |
| <b>s-3d</b> | -                 | >85               | >85              | [8]       |
| <b>s-4a</b> | ND <sup>e</sup>   | -                 | -                | [10]      |
| <b>s-4b</b> | ND                | -                 | -                | [10]      |
| <b>s-4c</b> | >64               | >64               | -                | [10]      |
| <b>s-4d</b> | >64               | >64               | -                | [10]      |
| <b>s-4e</b> | >64               | >64               | -                | [10]      |
| <b>s-4f</b> | ND                | -                 | -                | [10]      |
| <b>s-4g</b> | ND                | -                 | -                | [10]      |
| <b>s-4h</b> | ND                | -                 | -                | [10]      |
| <b>s-4i</b> | ND                | -                 | -                | [10]      |
| <b>s-4j</b> | >64               | >64               | -                | [9, 11]   |
| <b>s-4k</b> | >64               | >64               | -                | [9]       |
| <b>s-4l</b> | >64               | >64               | -                | [9]       |
| <b>s-4m</b> | >64               | >64               | -                | [9]       |
| <b>s-4n</b> | >64               | >64               | -                | [9]       |
| <b>s-4o</b> | >64               | >64               | -                | [9]       |
| <b>s-4p</b> | >64               | >64               | -                | [9]       |
| <b>s-4q</b> | >64               | >64               | -                | [9]       |
| <b>s-4r</b> | >64               | >64               | -                | [9]       |
| <b>s-4s</b> | >64               | >64               | -                | [9]       |
| <b>s-4t</b> | >64               | >64               | -                | [9]       |

|       |                 |     |    |      |
|-------|-----------------|-----|----|------|
| s-4u  | >64             | >64 | -  | [9]  |
| s-4v  | >64             | >64 | -  | [9]  |
| s-4w  | >64             | >64 | -  | [9]  |
| s-4x  | >64             | >64 | -  | [9]  |
| s-4y  | >64             | >64 | -  | [9]  |
| s-4z  | >64             | >64 | -  | [9]  |
| s-4a' | >64             | >64 | -  | [9]  |
| s-4b' | >64             | >64 | -  | [9]  |
| s-4c' | >64             | >64 | -  | [9]  |
| s-4d' | >64             | >64 | -  | [9]  |
| s-4e' | >64             | >64 | -  | [9]  |
| s-4f' | >64             | >64 | -  | [9]  |
| s-4g' | >64             | >64 | -  | [9]  |
| s-4h' | >64             | >64 | -  | [9]  |
| s-4i' | >64             | >64 | -  | [9]  |
| s-4j' | >64             | >64 | -  | [9]  |
| s-4k' | >64             | >64 | -  | [9]  |
| s-4l' | >64             | >64 | -  | [9]  |
| s-4m' | >64             | >64 | -  | [9]  |
| s-4n' | >64             | >64 | -  | [9]  |
| s-4o' | >64             | >64 | -  | [9]  |
| s-4p' | >64             | >64 | -  | [9]  |
| s-4q' | >64             | >64 | -  | [3]  |
| s-4r' | >64             | >64 | -  | [7]  |
| s-4s' | >64             | >64 | -  | [7]  |
| s-4t' | >64             | >64 | -  | [3]  |
| s-4u' | >64             | >64 | -  | [3]  |
| s-5a  | NA <sup>f</sup> | -   | -  | [11] |
| s-5b  | NA              | -   | -  | [11] |
| s-5c  | NA              | -   | -  | [11] |
| s-5d  | NA              | -   | -  | [11] |
| s-5e  | NA              | -   | -  | [11] |
| s-5f  | NA              | -   | -  | [11] |
| s-5g  | NA              | -   | -  | [11] |
| s-5h  | NA              | -   | -  | [11] |
| s-5i  | NA              | -   | -  | [11] |
| s-5j  | NA              | -   | -  | [11] |
| s-6a  | ND              | ND  | ND | [12] |
| s-6b  | ND              | ND  | ND | [12] |

<sup>a</sup>methicillin-sensitive *S.aureus*. <sup>b</sup>methicillin-resistant *S. aureus*. <sup>c</sup>vancomycin-resistant *Enterococci*. <sup>d</sup>-, not tested against this pathogen. <sup>e</sup>ND, not determined (in some cases, compounds were reported as “less than that of PTM” without an MIC value). <sup>f</sup>NA, no activity without specifying the upper limit concentrations tested.

**Figure S1.** Summarize of platensimycin ADHBA variants. (i) black: isolated from wild-type; (ii) purple: isolated from engineered strains; (iii) blue: from semisynthesis; (iv) red: from total synthesis; (v) green: from mutasynthesis.

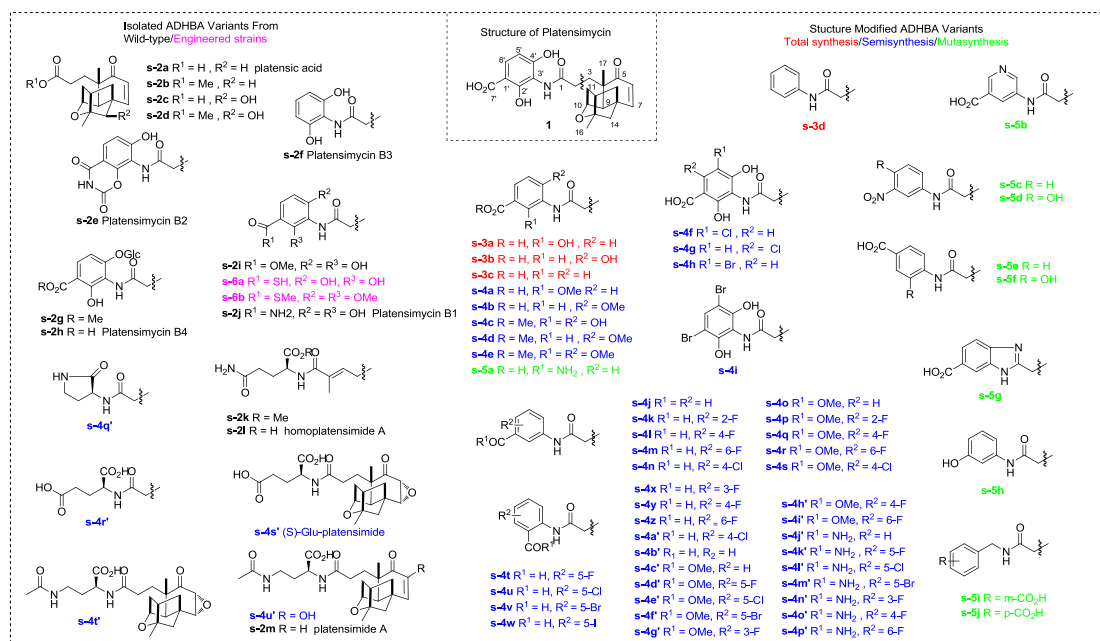

**Figure S2.** Paper Disc Method. Five PTM analogues **7b**, **8**, **10a**, **10b**, **29c** showed clear zone of inhibition against *S. aureus* 29213 and one MRSA strain, when tested in 25 µg/disc, using PTM and Linezolid (5 µg/disc) as a positive control and MeOH as a negative control. The 5'-Cl-platensimycin **s-4f** and 5'-Br-platensimycin **s-4h** were prepared based on a previous work.<sup>[10]</sup> The experiments were repeated at least for three times and only the results from one experiment were presented.

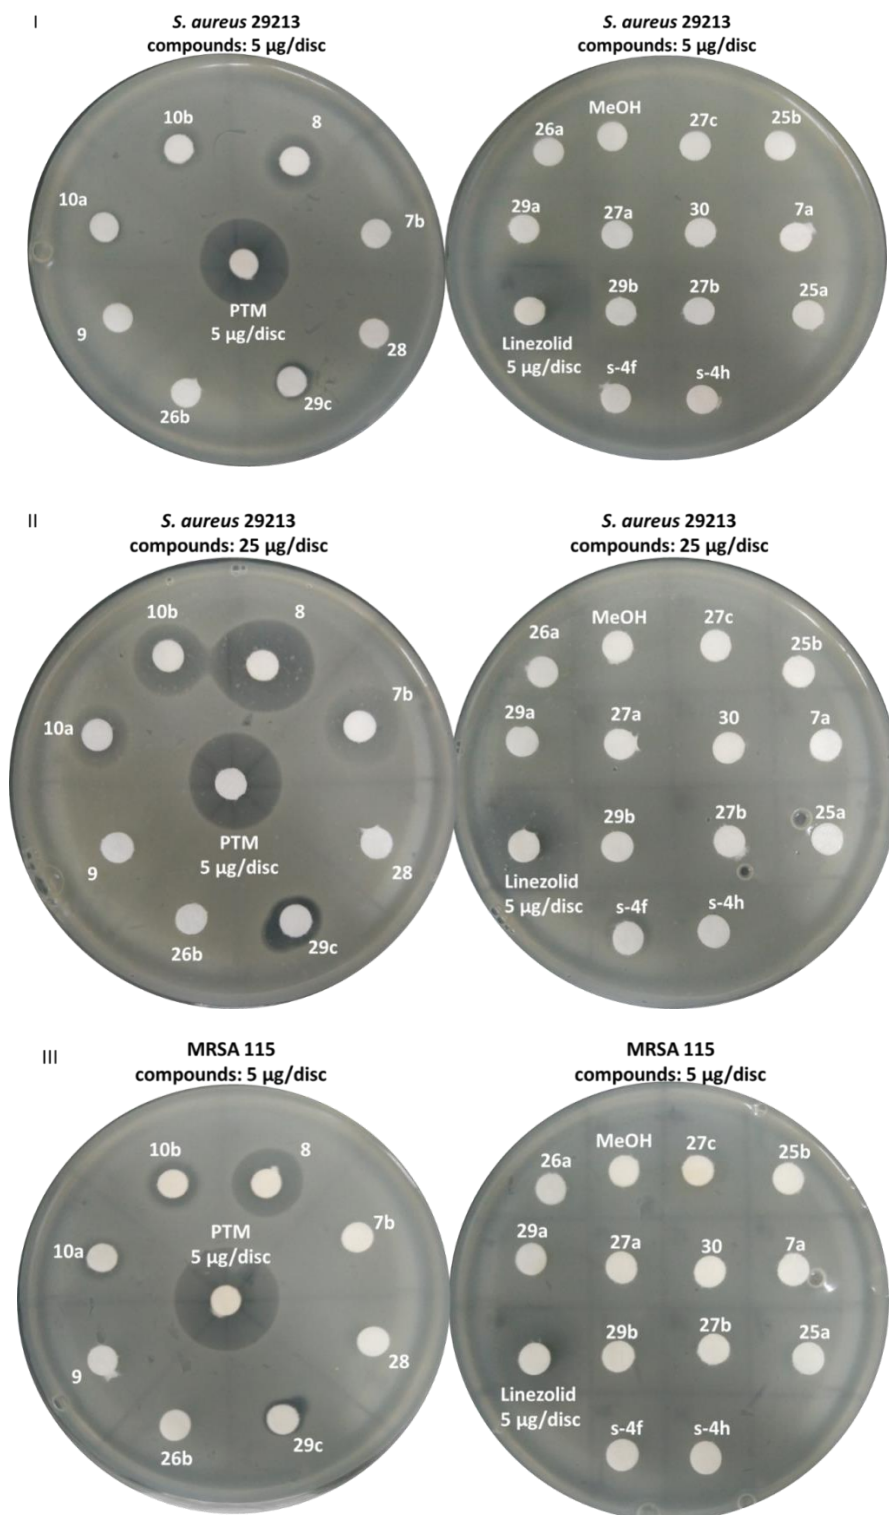

IV

**MRSA 115**  
compounds: 25 µg/disc

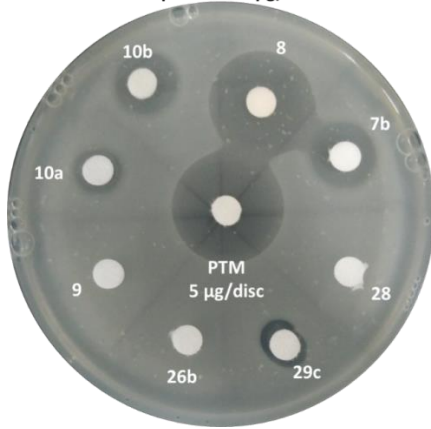

**MRSA 115**  
compounds: 25 µg/disc

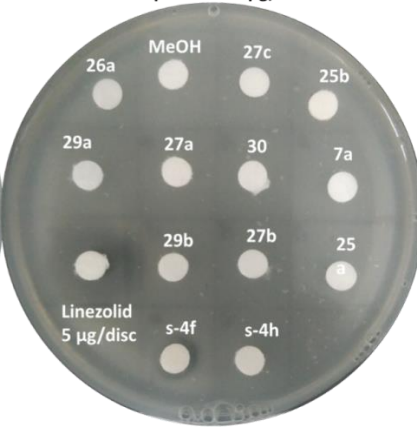

V

***K. pneumoniae* 113**  
compounds: 25 µg/disc

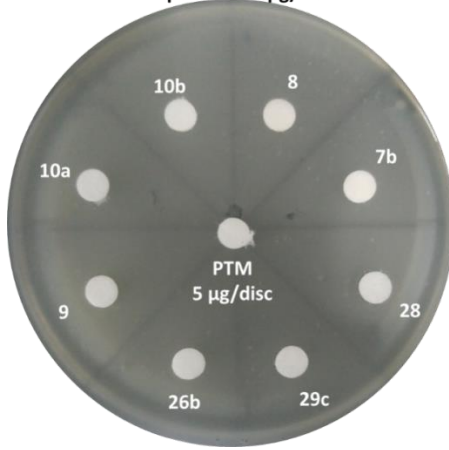

***K. pneumoniae* 113**  
compounds: 25 µg/disc

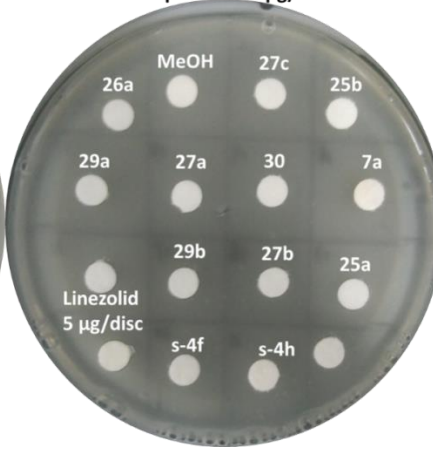

**Figure S3.** The stability analysis of **8** in LB agar. The compounds **8** ( $0.1 \text{ mg mL}^{-1}$ ) were diluted in 5 mL LB agar to  $0.004$  or  $0.008 \text{ mg mL}^{-1}$ , and the resulting LB agar plates were incubated at  $37^\circ\text{C}$  for 16 h. PTM was used as control. The LB agar with the tested compounds were then extracted by  $\text{CH}_2\text{Cl}_2$  ( $3 \times 10 \text{ mL}$ ), dried by anhydrous  $\text{Na}_2\text{SO}_4$ , concentrated *in vacuum* and analyzed by HPLC.

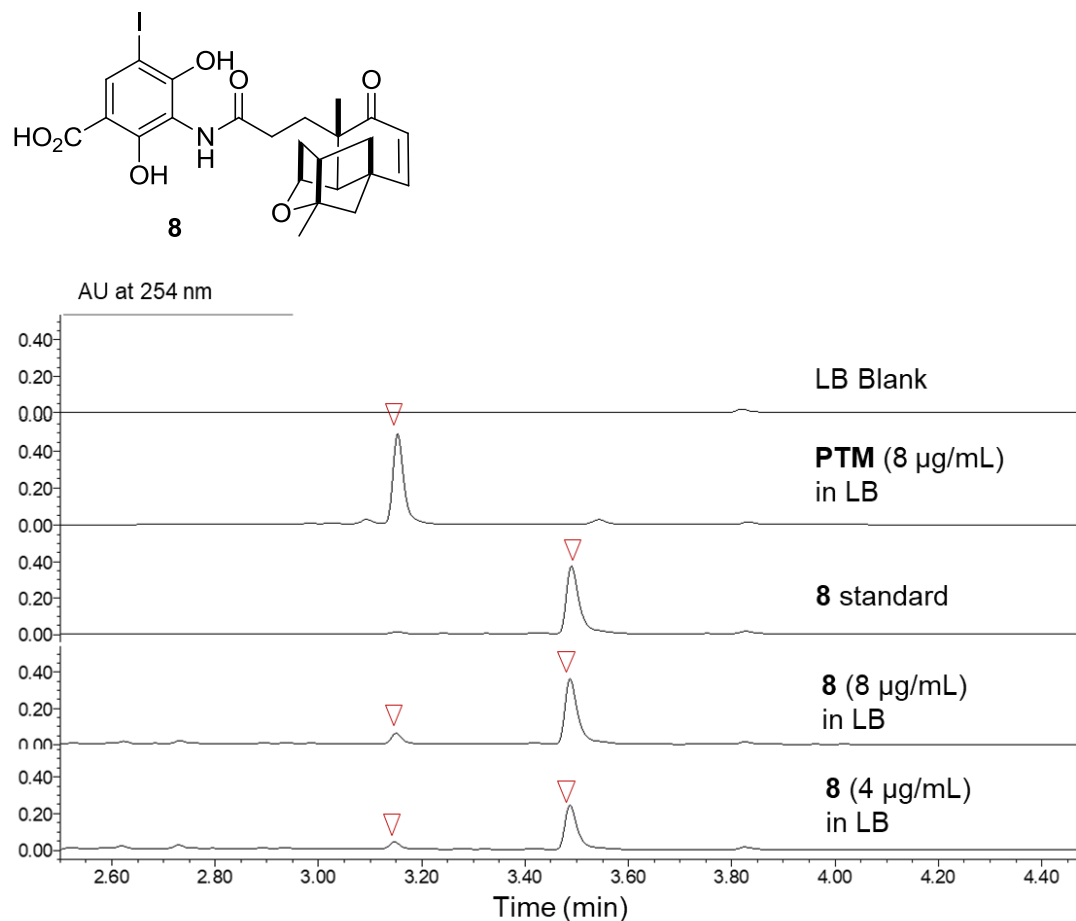

## Experimental procedure and physical data

Arylamines **6**,<sup>[13]</sup> **13**,<sup>[14]</sup> **15a**,<sup>[15]</sup> **15b**,<sup>[15]</sup> **17a**,<sup>[16]</sup> **17b**,<sup>[16]</sup> **19**,<sup>[16b]</sup> **21a**,<sup>[17]</sup> **21b**,<sup>[17]</sup> **24**,<sup>[14a]</sup> **S11**<sup>[13]</sup> were prepared by following the procedures based on the methods in the references. Others were purchased from commercial suppliers and used without further purification.

### Supporting Scheme S1. Synthesis of anilines **6** and **S11**.

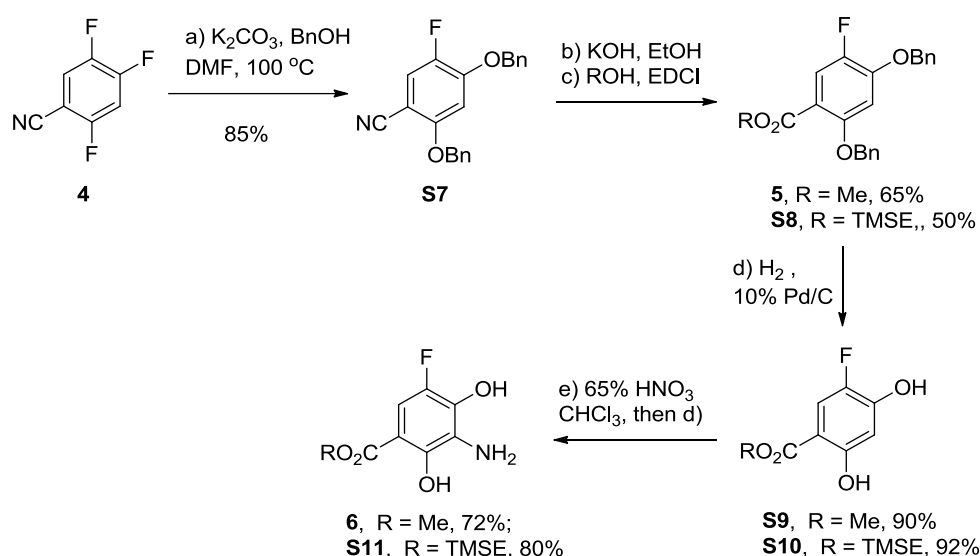

<sup>a</sup> Reagents and conditions: (a) K<sub>2</sub>CO<sub>3</sub> (5 equiv.), BnOH (2.5 equiv.), DMF, 105 °C, 16 h, 85%; (b) 6 N KOH, EtOH, 140 °C, 1.5 h, 95%; (c) MeOH, DMAP (0.1 equiv.), EDCI (1.2 equiv.), Et<sub>3</sub>N (2.5 equiv.) 10 h, 65% (for **5**), 50% (for **S8**); (d) H<sub>2</sub> (1.1 atm.), 10% Pd/C (0.2 equiv.), MeOH, 25 °C, 3 h, 90% (for **S9**), 92% (for **S10**); (e) 65% HNO<sub>3</sub>, CHCl<sub>3</sub>, 15 min, 72% (for **6**), 80% (for **S11**).

**2,4-bis(benzyloxy)-5-fluorobenzonitrile (S7)**. To a solution of **4** (1.57 g, 10 mmol)

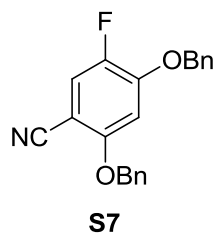

in DMF (5 mL) was added benzyl alcohol (5 mL, 50 mmol) and potassium carbonate (6.9 g, 50 mmol). The vessel was heated to 105 °C for 16 h, subsequently placed under high vacuum for 2 h to remove DMF, followed by purification using column chromatography on silica gel (eluent: petroleum ether/ethyl acetate (10:1)) to afford **S7** (2.83 g, 85%) as a yellow solid. <sup>1</sup>H NMR (400 MHz, CDCl<sub>3</sub>) δ 7.38 (dd, *J* = 4.2, 2.2 Hz, 10H), 7.25 (d, *J* = 4.9 Hz, 1H), 6.57 (d, *J* = 6.8 Hz, 1H), 5.11 (d, *J* = 2.7 Hz, 4H); <sup>13</sup>C NMR (101 MHz, CDCl<sub>3</sub>) δ 157.95 (s), 151.40 (d, *J* = 11.6 Hz), 147.62 (s), 145.21 (s), 135.28 (s), 135.03 (s), 128.93 – 128.51 (m), 128.37 (s), 127.31 (s), 126.98 (s), 119.92 (s), 119.70 (s), 115.70 (s), 101.18 (s), 93.30 (d, *J* = 4.9 Hz), 77.31 (s), 76.99 (s), 76.68 (s), 71.42 (d, *J* = 3.9 Hz). MS (ESI): *m/z* calcd for C<sub>21</sub>H<sub>17</sub>FN<sub>2</sub> [M+H]<sup>+</sup>: 334.1243; found: 334.0918.



**Methyl 2,4-bis(benzyloxy)-5-fluorobenzoate-2-(trimethylsilyl)ethyl (5).** To a

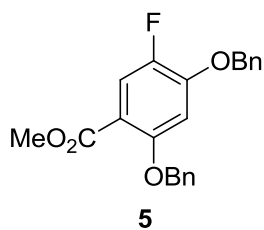

suspension of benzonitrile **S7** (1.17 g, 3.5 mmol) in EtOH (6 mL) was added KOH (1.22 g, 21.8 mmol) in H<sub>2</sub>O (6 mL). The mixture was heated in a sealed tube at 140 °C in an oil bath for 1.5 hours and then concentrated under reduced pressure at 45 °C. The resulting slurry was acidified with 2 N HCl (12 mL) and filtered. The filter cake was washed with H<sub>2</sub>O (3×10 mL)

and dried *in vacuo* at ambient temperature to give 2,4-bis(benzyloxy)-5-fluorobenzoic acid as an off-white solid (1.07 g, 87%). A mixture of 2,4-bis(benzyloxy)-5-fluorobenzoic acid (704 mg, 2.0 mmol), alcohol methanol (160 μL, 4.0 mmol), DMAP (24.4 mg, 0.2 mmol), and EDCI (1.15 g, 6.0 mmol) in CH<sub>2</sub>Cl<sub>2</sub> (25 mL) was stirred at room temperature overnight. The reaction mixture was washed with saturated NaCl. The CH<sub>2</sub>Cl<sub>2</sub> solution was separated, dried over Na<sub>2</sub>SO<sub>4</sub>, and removed by rotary evaporation. The residue was purified by chromatography using 10 : 1 petroleum ether/ethyl acetate to obtain **5** (0.83 g, 65%). <sup>1</sup>H NMR (400 MHz, CDCl<sub>3</sub>) δ 7.66 (d, *J* = 11.8 Hz, 1H), 7.45 (d, *J* = 7.3 Hz, 2H), 7.42 – 7.29 (m, 8H), 6.60 (d, *J* = 6.9 Hz, 1H), 5.10 (d, *J* = 15.6 Hz, 4H), 3.87 (s, 3H); <sup>13</sup>C NMR (101 MHz, CDCl<sub>3</sub>) δ 164.11 (s), 154.87 (s), 149.56 (d, *J* = 11.9 Hz), 146.67 (s), 144.28 (s), 135.40 (s), 134.57 (s), 127.73 (s), 127.58 (s), 127.40 (s), 126.93 (s), 126.38 (s), 125.93 (s), 118.15 (s), 117.94 (s), 111.39 (s), 111.33 (s), 101.71 (s), 70.84 (s), 70.28 (s), 50.93 (s); HRMS (ESI): *m/z* calcd for C<sub>22</sub>H<sub>20</sub>FO<sub>4</sub> [M+H]<sup>+</sup>: 367.1346; found: 367.1339.

**2,4-bis(benzyloxy)-5-fluorobenzoate (S8).** To a suspension of benzonitrile **S7** (1.17

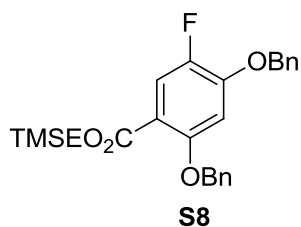

g, 3.5 mmol) in EtOH (6 mL) was added KOH (1.22 g, 21.8 mmol) in H<sub>2</sub>O (6 mL). The mixture was heated in a sealed tube at 140 °C in an oil bath for 1.5 hours and then concentrated under reduced pressure at 45 °C. The resulting slurry was acidified with 2 N HCl (12 mL) and filtered. The filter cake was washed with H<sub>2</sub>O (3×10 mL) and dried *in vacuo* at ambient temperature to give 2,4-bis(benzyloxy)-5-fluorobenzoic acid as an off-white solid (1.07 g, 87%).

A mixture of 2,4-bis(benzyloxy)-5-fluorobenzoic acid (704 mg, 2.0 mmol), 2-(trimethylsilyl) ethanol (236 mg, 2.0 mmol), DMAP (30 mg, 0.2 mmol), and EDCI (1.16 g, 6.0 mmol) in CH<sub>2</sub>Cl<sub>2</sub> (25 mL) was stirred at room temperature overnight. The reaction mixture was washed with saturated NaCl. The CH<sub>2</sub>Cl<sub>2</sub> solution was separated, dried over Na<sub>2</sub>SO<sub>4</sub>, and removed by rotary evaporation. The residue was purified by chromatography using 10 : 1 petroleum ether/ethyl acetate to obtain **S8** (0.79 g, 50%); <sup>1</sup>H NMR (400 MHz, CDCl<sub>3</sub>) δ 7.68 (d, *J* = 11.8 Hz, 1H), 7.48 (d, *J* = 7.2 Hz, 2H), 7.45 – 7.30 (m, 8H), 6.62 (d, *J* = 6.9 Hz, 1H), 5.11 (d, *J* = 18.4 Hz, 4H), 4.48 – 4.27 (m, 3H), 1.15 – 1.06 (m, 2H), 0.09 (s, 9H); <sup>13</sup>C NMR (101 MHz, CDCl<sub>3</sub>) δ 164.95 (s), 155.78 (d, *J* = 1.9 Hz), 150.38 (d, *J* = 12.0 Hz), 147.74 (s), 145.35 (s), 136.51 (s), 135.71 (s), 128.76 (s), 128.56 (s), 128.42 (s), 127.97 (s), 127.43 (s), 127.13 (s), 119.12 (s), 118.91 (s), 113.09 (d, *J* = 5.5 Hz), 102.78 (s), 77.34 (d, *J* = 11.6 Hz), 77.08 (s), 76.76 (s), 71.88

(s), 71.35 (s), 66.09 (s), 65.81 (s), 63.12 (s), 44.25 (s), 28.87 (s), 25.75 (s), 17.46 (s), 17.23 (s), -1.51 (d,  $J = 7.1$  Hz). MS (ESI):  $m/z$  calcd for  $C_{26}H_{28}FO_4Si$   $[M+H]^+$ : 451.1741; found: 451.4084.

**Methyl 5-fluoro-2,4-dihydroxybenzoate (S9).** To a solution of **5** (431 mg, 1.18 mmol) in MeOH (12 mL) was added 10% Pd/C (43 mg) and the suspension was stirred for 3 h under an atmosphere of hydrogen.

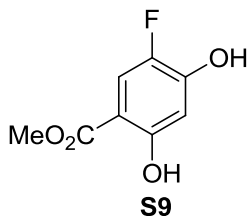

After filtration, the solvent was removed under vacuum to give crude product. Purification by column chromatography on silica gel (ethyl acetate/petroleum ether = 1:10) to afford pure product **S9** (197 mg, 90%).  $^1H$  NMR (400 MHz,  $CDCl_3$ )  $\delta$  10.74 (s, 1H), 7.52 (d,  $J = 10.8$  Hz, 1H), 6.57 (d,  $J = 7.4$  Hz, 1H), 5.89 (s, 1H), 3.92 (s, 3H).  $^{13}C$  NMR (101 MHz,  $CDCl_3$ )  $\delta$  169.75 (s), 159.63 (s), 150.38 (d,  $J = 16.2$  Hz), 145.53 (s), 143.23 (s), 115.47 (s), 115.26 (s), 104.98 (s), 104.25 (d,  $J = 6.3$  Hz), 77.35 (s), 77.03 (s), 76.71 (s), 52.32 (s). MS (ESI):  $m/z$  calcd for  $C_8H_6FO_4$   $[M+H]^+$ : 185.0250; found: 185.1074.

**2-(trimethylsilyl)ethyl 5-fluoro-2,4-dihydroxybenzoate (S10).** To a solution of **S8** (533 mg, 1.18 mmol) in MeOH (12 mL) was added 10% Pd/C (53 mg) and the suspension was stirred for 3 h under an atmosphere of hydrogen.

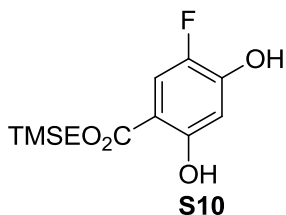

After filtration, the solvent was removed under vacuum to give crude product. Purification by column chromatography on silica gel (ethyl acetate/petroleum ether = 1:10) to afford pure product **S10** (296 g, 92%).  $^1H$  NMR (400 MHz,  $CDCl_3$ )  $\delta$  10.89 (s, 1H), 7.51 (d,  $J = 10.8$  Hz, 1H), 6.56 (d,  $J = 7.4$  Hz, 1H), 5.95 (s, 1H), 4.52 – 4.29 (m, 2H), 1.20 – 1.05 (m, 2H), 0.08 (s, 9H).  $^{13}C$  NMR (101 MHz,  $CDCl_3$ )  $\delta$  169.55 (s), 159.66 (s), 150.21 (d,  $J = 16.0$  Hz), 145.50 (s), 143.20 (s), 115.42 (s), 115.22 (s), 104.95 (s), 104.65 (d,  $J = 6.0$  Hz), 77.29 (d,  $J = 11.6$  Hz), 77.03 (s), 76.71 (s), 63.92 (s), 29.71 (s), 17.40 (s), -1.48 (s). MS (ESI):  $m/z$  calcd for  $C_{12}H_{16}FO_4Si$   $[M+H]^+$ : 271.0802; found: 271.1101.

**Methyl 3-amino-5-fluoro-2,4-dihydroxybenzoate (6).** To a solution of Methyl 5-fluoro-2,4-dihydroxybenzoate **S9** (100 mg, 0.5 mmol) in  $CHCl_3$  (25 mL) was slowly added 65%  $HNO_3$  (40  $\mu$ L) at 0  $^\circ C$ ,

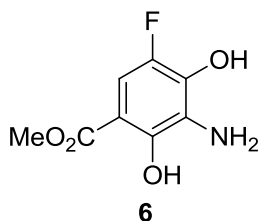

and the mixture was warmed to room temperature. After stirring at 25  $^\circ C$  for another 15 minutes, a yellowish precipitate was formed, and the solid was filtered off. Then the filtered cake was dried and dissolved in MeOH (12 mL), after that 10% Pd/C (12 mg) was added and the suspension was stirred for 3 h under an atmosphere of hydrogen.

After filtration, the solvent was removed under vacuum to give product **6** (72 mg, 72%) without further purification.  $^1H$  NMR (400 MHz,  $DMSO-d_6$ )  $\delta$  10.52 (s, 1H), 6.84 (d,  $J = 11.2$  Hz, 1H), 3.86 (s, 3H);  $^{13}C$  NMR (101 MHz,  $DMSO-d_6$ )  $\delta$  170.27 (d,  $J = 3.1$  Hz), 146.98 (s), 146.03 (s), 144.69 (s), 137.43 (d,  $J = 17.9$  Hz),

102.42 (d,  $J = 8.6$  Hz), 102.00 (s), 101.79 (s), 52.76 (s); HRMS (ESI):  $m/z$  calcd for  $C_8H_9FNO_4$   $[M+H]^+$ : 202.0516; found: 202.0508.

**2-(trimethylsilyl)ethyl 3-amino-5-fluoro-2,4-dihydroxybenzoate (S11).** To a

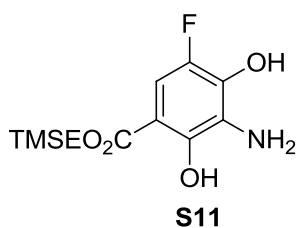

solution of 2-(trimethylsilyl)ethyl-5-fluoro-2,4-dihydroxybenzoate **S10** (136 mg, 0.5 mmol) in  $CHCl_3$  (25 mL) was slowly added 65%  $HNO_3$  (40  $\mu L$ ) at 0  $^{\circ}C$ , and the mixture was warmed to room temperature. After stirring at 25  $^{\circ}C$  for another 15 minutes, a yellowish precipitate was formed, and the solid was filtered off. Then the filtered cake was dried and dissolved in MeOH (12 mL), after that 10% Pd/C (16 mg) was added the suspension was stirred for 3 h under an atmosphere of hydrogen. After filtration, the solvent was removed under vacuum to give product **S11** (114 mg, 80%) without further purification.  $^1H$  NMR (400 MHz,  $CDCl_3$ )  $\delta$  10.91 (s, 1H), 7.29 (s, 1H), 4.52 – 4.27 (m, 2H), 1.19 – 1.01 (m, 2H), 0.15 – 0.02 (m, 9H).  $^{13}C$  NMR (101 MHz,  $CDCl_3$ )  $\delta$  158.25 – 157.75 (m), 125.52 (s), 77.37 (s), 77.05 (s), 76.73 (s), 66.10 (s), 65.73 (d,  $J = 17.3$  Hz), 44.22 (s), 31.93 (s), 30.32 (s), 29.54 (d,  $J = 33.7$  Hz), 28.86 (s), 28.86 – 28.71 (m), 25.74 (s), 22.70 (s), 17.84 – 17.02 (m), 14.13 (s), 1.02 (s), -1.53 (d,  $J = 9.9$  Hz). MS (ESI):  $m/z$  calcd for  $C_{12}H_{19}FO_4Si$   $[M+H]^+$ : 288.1067; found: 288.0727.

**Supporting Scheme S2.** Synthesis of anilines **13**.

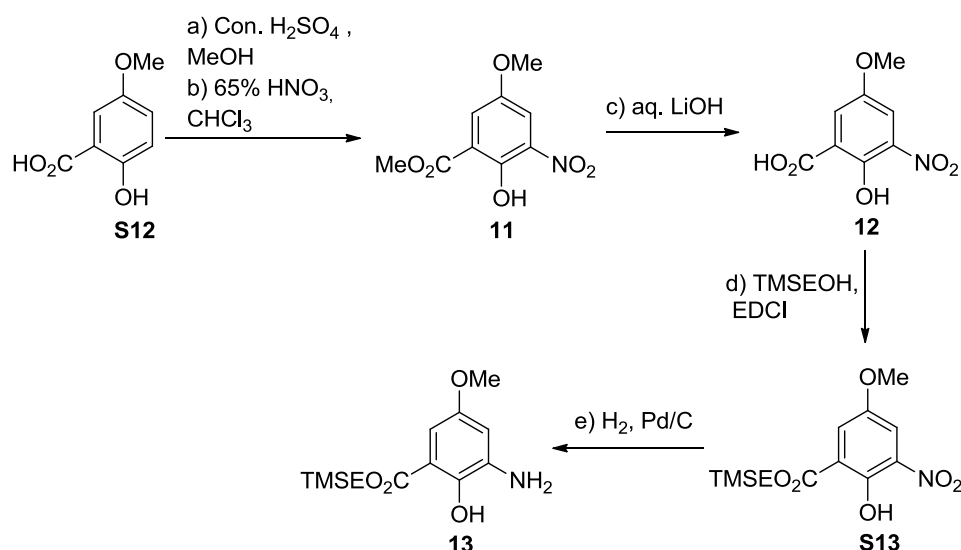

<sup>a</sup> Reagents and conditions: (a) Con.  $\text{H}_2\text{SO}_4$ , MeOH, 80 °C, 24 h, 85%; (b) 65%  $\text{HNO}_3$ ,  $\text{CHCl}_3$ , r.t., 2 h, 90%; (c) THF, aq. LiOH, 45 °C, 4 h, 95%; (d) TMSEOH (1.2 equiv.), EDCI (1.0 equiv.),  $\text{NEt}_3$  (2.0 equiv.),  $\text{CH}_2\text{Cl}_2$ , 25 °C, 12 h, 89%; (e)  $\text{H}_2$  (1.1 atm.), 10% Pd/C (0.2 equiv.), MeOH, 25 °C, 3 h, 95%.

**Methyl 2-hydroxy-5-methoxy-3-nitrobenzoate (11)**. 2-hydroxy-5-methoxybenzoic acid (5.04 g, 30.0 mmol) was dissolved in MeOH (50 mL), to which con.  $\text{H}_2\text{SO}_4$  (3 mL) was added. The mixture was heated under reflux for 24 h. The solvent was then removed in vacuo and the residue was dissolved in  $\text{CH}_2\text{Cl}_2$  (100 mL), washed with water (3 × 50 mL) and dried over anhydrous  $\text{Na}_2\text{SO}_4$ . Removal of  $\text{CH}_2\text{Cl}_2$  gave the pure product methyl 2-hydroxy-5-methoxybenzoate (4.64 g, 85%) as a light brown solid. To a solution of methyl 2-hydroxy-5-methoxybenzoate (1.82 g, 10 mmol) in  $\text{CHCl}_3$  (25 mL) was slowly added 65%  $\text{HNO}_3$  (400  $\mu\text{L}$ ) at 0 °C, and the mixture was warmed to room temperature. After stirring at 25 °C for 2h, a yellowish precipitate was formed, and the solid was filtered off to give the title product **11** (2.04 g, 90%). MS (ESI):  $m/z$  calcd for  $\text{C}_9\text{H}_8\text{NO}_6$  [ $\text{M}+\text{H}$ ]: 226.0352; found: 226.1539.

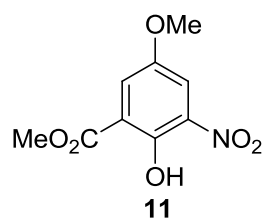

**2-hydroxy-5-methoxy-3-nitrobenzoic acid (12)**. To a stirred solution of **11** (1.14 g, 5 mmol) in THF (5 mL) was added an aqueous solution of LiOH (2 M, 5 mL). The resulting mixture was stirred at 45 °C for 4 h. The resulting mixture was then cooled to room temperature, acidified with an aqueous solution of HCl (2 M, 10 mL) and extracted with EtOAc (4 × 20 mL). The combined organic phases were dried over  $\text{Na}_2\text{SO}_4$ , filtered and concentrated *in vacuo*. The residue so obtained was purified by flash column chromatography (silica

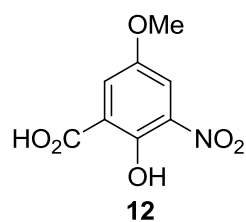

gel, ethyl acetate/methanol = 6:1) to give title compound **12** (1.01 g, 95%) as a yellow solid.  $^1\text{H}$  NMR (400 MHz, DMSO- $d_6$ )  $\delta$  11.76 (s, 1H), 7.74 – 7.64 (m, 1H), 7.60 – 7.49 (m, 1H), 3.77 (s, 3H);  $^{13}\text{C}$  NMR (101 MHz, DMSO- $d_6$ )  $\delta$  171.11 (s), 150.32 (s), 149.28 (s), 138.25 (s), 121.00 (s), 116.98 (s), 116.22 (s), 56.48 (s), 40.22 (s), 40.01 (s), 39.95 – 39.92 (m), 39.69 (d,  $J = 21.0$  Hz), 39.38 (s). MS (ESI):  $m/z$  calcd for  $\text{C}_8\text{H}_6\text{NO}_6$  [M+H] $^-$ : 212.0195; found: 212.1040.

**2-(trimethylsilyl)ethyl 2-hydroxy-5-methoxy-3-nitrobenzoate (S13)**. A mixture of

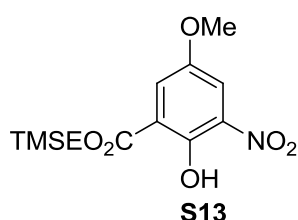

**9** (567 mg, 2.5 mmol), 2-(trimethylsilyl)ethanol (307 mg, 2.6 mmol), DMAP (12.2 mg, 0.1 mmol), and EDCI (443 mg, 3.75 mmol) in  $\text{CH}_2\text{Cl}_2$  (15 mL) was stirred at 25 °C overnight. The reaction mixture was washed with water and then with saturated  $\text{NaHCO}_3$ . The ethyl acetate solution was separated, dried over  $\text{Na}_2\text{SO}_4$ , and ethyl acetate removed by rotary evaporation. The residue was purified by chromatography using ethyl acetate/petroleum ether = 1:10 to obtain **S13** (698 mg, 89%);  $^1\text{H}$  NMR (400 MHz,  $\text{CDCl}_3$ )  $\delta$  11.68 (s, 1H), 7.71 (d,  $J = 3.2$  Hz, 1H), 7.68 (d,  $J = 3.3$  Hz, 1H), 4.55 – 4.46 (m, 2H), 3.85 (s, 3H), 1.21 – 1.16 (m, 2H), 0.11 (s, 9H).  $^{13}\text{C}$  NMR (101 MHz,  $\text{CDCl}_3$ )  $\delta$  168.64 (s), 150.56 (s), 150.00 (s), 137.67 (s), 121.45 (s), 116.41 (d,  $J = 4.8$  Hz), 77.40 (s), 77.09 (s), 76.77 (s), 65.26 (s), 56.24 (s), 29.71 (s), 17.34 (s), -1.48 (s). MS (ESI):  $m/z$  calcd for  $\text{C}_{13}\text{H}_{18}\text{NO}_6\text{Si}$  [M+H] $^+$ : 312.0903; found: 312.1224.

**2-(trimethylsilyl)ethyl 3-amino-2-hydroxy-5-methoxybenzoate (13)**. To a solution of **65** (100 mg, 0.32 mmol) in MeOH (12 mL) was added 10% Pd/C (10 mg) and the suspension was stirred for 3 h under an atmosphere of hydrogen. After filtration, the solvent was removed under vacuum to give product **13** (70 mg, 95%) without further purification.

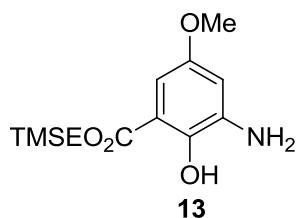

$^1\text{H}$  NMR (400 MHz,  $\text{CDCl}_3$ )  $\delta$  10.72 (s, 1H), 6.71 (d,  $J = 2.9$  Hz, 1H), 6.52 (d,  $J = 2.8$  Hz, 1H), 4.49 – 4.43 (m, 2H), 3.76 (s, 3H), 1.17 (s, 2H), 0.12 (s, 9H).  $^{13}\text{C}$  NMR (101 MHz,  $\text{CDCl}_3$ )  $\delta$  170.71 (s), 152.03 (s), 144.99 (s), 136.84 (s), 111.33 (s), 108.07 (s), 99.91 (s), 77.38 (s), 77.06 (s), 76.74 (s), 63.78 (s), 55.59 (s), 29.73 (s), -1.40 (s); HRMS (ESI):  $m/z$  calcd for  $\text{C}_{13}\text{H}_{22}\text{NO}_4\text{Si}$  [M+H] $^+$ : 284.1318; found: 284.1312.

**Supporting Scheme S3.** Synthesis of anilines **15a** and **15b**.

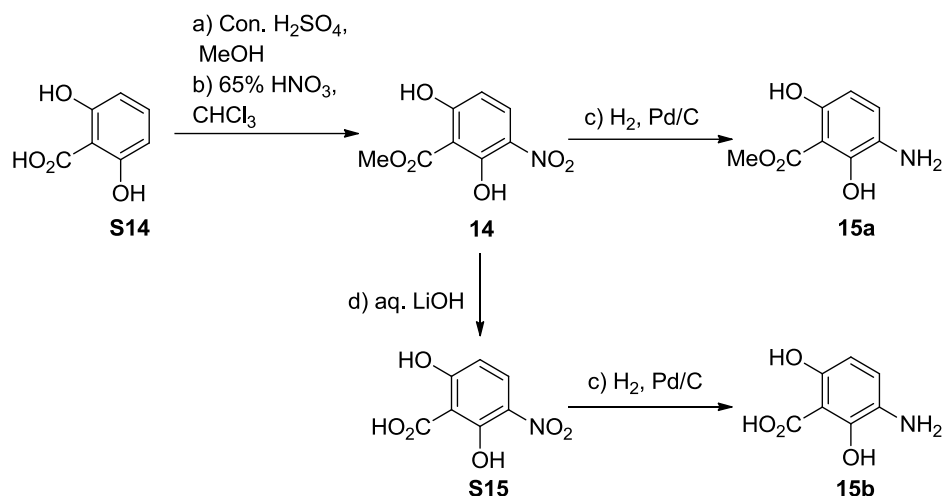

<sup>a</sup> Reagents and conditions: (a) Con. H<sub>2</sub>SO<sub>4</sub>, MeOH, 80 °C, 24 h, 72%; (b) 65% HNO<sub>3</sub>, CHCl<sub>3</sub>, r.t., 10 min, 95%; (d) THF, aq. LiOH, 45 °C, 91%; (c) H<sub>2</sub> (1.1 atm.), 10% Pd/C (0.2 equiv.), MeOH, 25 °C, 3 h, 91% (for **15a**), 89% (for **15b**).

**Methyl 2,6-dihydroxy-3-nitrobenzoate (14).** 2,6-dihydroxybenzoic acid **S14** (4.62 g, 30.0 mmol) was dissolved in MeOH (50 mL), to which con. H<sub>2</sub>SO<sub>4</sub> (3 mL) was added. The mixture was heated under reflux for 24 h. The solvent was then removed in vacuo and the residue was dissolved in CH<sub>2</sub>Cl<sub>2</sub> (100 mL), washed with water (3 × 50 mL) and dried over anhydrous Na<sub>2</sub>SO<sub>4</sub>. Removal of CH<sub>2</sub>Cl<sub>2</sub> gave the pure product methyl 2,6-dihydroxy benzoate (3.63 g, 21.6 mmol) as a light brown solid. To a solution of methyl 2,6-dihydroxy benzoate (1.68 g, 10 mmol) in CHCl<sub>3</sub> (25 mL) was slowly added 65% HNO<sub>3</sub> (400 μL) at 0 °C, and the mixture was warmed to room temperature. After stirring at 25 °C for 2h, a yellowish precipitate was formed, and the solid was filtered off to give the title product **14** (2.02 g, 95%). <sup>1</sup>H NMR (400 MHz, CDCl<sub>3</sub>) δ 12.70 (s, 1H), 12.63 (s, 1H), 8.26 (d, *J* = 9.6 Hz, 1H), 6.63 (d, *J* = 9.6 Hz, 1H), 4.08 (s, 3H). <sup>13</sup>C NMR (101 MHz, CDCl<sub>3</sub>) δ 170.80 (s), 170.57 (s), 159.46 (s), 133.23 (s), 131.63 (s), 110.80 (s), 102.12 (s), 77.37 (s), 77.05 (s), 76.74 (s), 53.32 (s). MS (ESI): *m/z* calcd for C<sub>8</sub>H<sub>6</sub>NO<sub>6</sub> [M+H]<sup>+</sup>: 212.0195; found: 212.0540.

**Methyl 3-amino-2,6-dihydroxybenzoate (15a).** To a solution of **14** (106 mg, 0.5 mmol) in MeOH (12 mL) was added 10% Pd/C (10 mg) and the suspension was stirred for 3 h under an atmosphere of hydrogen. After filtration, the solvent was removed under vacuum to give product **15a** (83 mg, 91%) without further purification. <sup>1</sup>H NMR (400 MHz, CDCl<sub>3</sub>) δ 10.00 (s, 1H), 8.82 (s, 1H), 6.90 (d, *J* = 8.6 Hz, 1H), 6.40 (d, *J* = 8.6 Hz, 1H), 4.10 (s, 3H). <sup>13</sup>C NMR (101 MHz, CDCl<sub>3</sub>) δ

170.17 (s), 152.44 (s), 147.96 (s), 144.51 (s), 127.52 (s), 123.18 (s), 107.13 (s), 99.89 (s), 77.35 (s), 77.03 (s), 76.72 (s), 52.84 (s), 29.71 (s); HRMS (ESI):  $m/z$  calcd for  $C_8H_{10}NO_4$   $[M+H]^+$ : 184.0610; found:184.0600.

**2,6-dihydroxy-3-nitrobenzoic acid (S15).** To a stirred solution of **14** (1.06 g, 5 mmol)

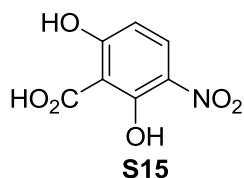

in THF (5 mL) was added an aqueous solution of LiOH (2 M, 5 mL). The resulting mixture was stirred at 45 °C for 4 h. The resulting mixture was then cooled to room temperature, acidified with an aqueous solution of HCl (2 M, 10 mL) and extracted with EtOAc (4 × 20 mL). The combined organic phases were dried over  $Na_2SO_4$ , filtered and concentrated in vacuo. The

residue so obtained was purified by flash column chromatography (silica gel, ethyl acetate/methanol = 6:1) to give title compound **S15** (905 mg, 91%) as a yellow solid.  $^1H$  NMR (400 MHz,  $DMSO-d_6$ )  $\delta$  9.90 (s, 3H), 7.95 (d,  $J$  = 9.4 Hz, 1H), 6.26 (d,  $J$  = 9.4 Hz, 1H).  $^{13}C$  NMR (101 MHz,  $DMSO-d_6$ )  $\delta$  174.59 (s), 168.43 (s), 161.00 (s), 130.41 (s), 128.16 (s), 106.71 (s), 104.55 (s), 40.37 (d,  $J$  = 20.9 Hz), 40.08 (s), 40.11 – 39.62 (m), 39.43 (s), 39.43 (s), 39.33 (d,  $J$  = 20.8 Hz). MS (ESI):  $m/z$  calcd for  $C_7H_4NO_6$   $[M+H]^-$ : 198.0039; found: 198.1052.

**3-amino-2,6-dihydroxybenzoic acid (15b).** To a solution of **S15** (100 mg, 0.5 mmol)

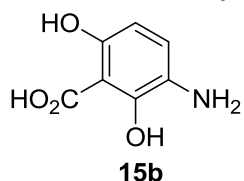

in MeOH (12 mL) was added 10% Pd/C (10 mg) and the suspension was stirred for 3 h under an atmosphere of hydrogen. After filtration, the solvent was removed under vacuum to give product **15b** (75 mg, 89%) without further purification.  $^1H$  NMR (500 MHz,  $DMSO-d_6$ )  $\delta$  7.90 (d,  $J$  = 9.1 Hz, 1H), 6.89 (d,  $J$  = 8.4

Hz, 1H), 6.04 (d,  $J$  = 8.3 Hz, 1H).  $^{13}C$  NMR (126 MHz,  $DMSO-d_6$ )  $\delta$  175.39 (s), 168.00 (s), 165.61 (s), 128.28 (s), 124.22 (s), 106.21 (s), 103.60 (s), 41.80 – 39.91 (m), 39.80 (s), 39.67 (d,  $J$  = 21.0 Hz), 39.42 (s); HRMS (ESI):  $m/z$  calcd for  $C_7H_8NO_4$   $[M+H]^+$ : 170.0453; found:170.0445.

**Supporting Scheme S4.** Synthesis of anilines **17a**, **17b** and **19**.

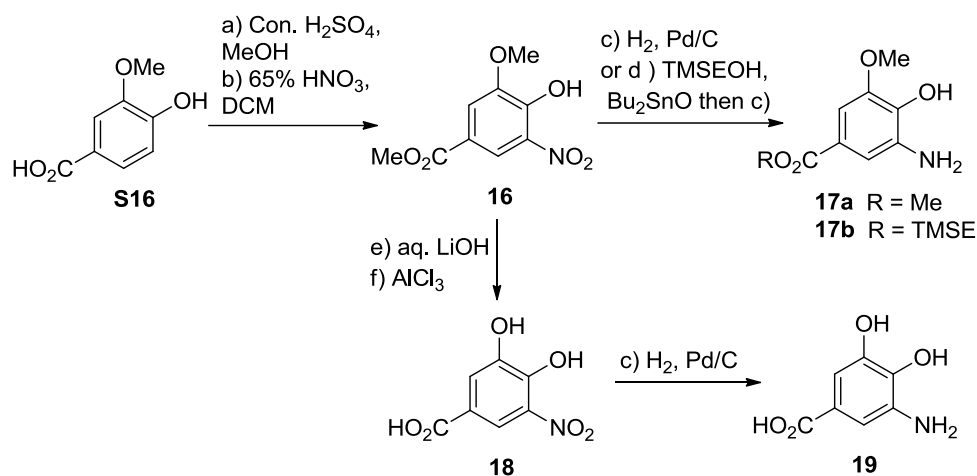

<sup>a</sup> Reagents and conditions: (a)  $\text{Con. H}_2\text{SO}_4$ ,  $\text{MeOH}$ ,  $80\text{ }^\circ\text{C}$ , 24 h, 95%; (b) 65%  $\text{HNO}_3$ ,  $\text{CHCl}_3$ , r.t., 2 h, 91%; (c)  $\text{H}_2$  (1.1 atm.), 10%  $\text{Pd/C}$  (0.2 equiv.),  $\text{MeOH}$ ,  $25\text{ }^\circ\text{C}$ , 3 h, 93% (for **17a**), 82% (for **17b**), 89% (for **19**); (d)  $\text{TMSEOH}$  (1.5 equiv.), toluene,  $\text{Bu}_2\text{SnO}$  (1.0 equiv.),  $150\text{ }^\circ\text{C}$ , 8 h, 85%; (e)  $\text{THF}$ ,  $\text{aq. LiOH}$ ,  $45\text{ }^\circ\text{C}$ , 4 h, 95%; (f)  $\text{AlCl}_3$  (3.0 equiv.), 1,2-DCE,  $90\text{ }^\circ\text{C}$ , 2 h, 85%;

**Methyl 4-hydroxy-3-methoxy-5-nitrobenzoate (16).** To a solution of 4-hydroxy-3-methoxybenzoic acid **S16** (5.04 g, 30.0 mmol) in  $\text{MeOH}$  (50 mL), to which  $\text{con. H}_2\text{SO}_4$  (3 mL) was added. The mixture was heated under reflux for 24 hrs. The solvent was then removed in vacuo and the residue was dissolved in  $\text{CH}_2\text{Cl}_2$  (100 mL), washed with water ( $3 \times 50\text{ mL}$ ) and dried over anhydrous  $\text{Na}_2\text{SO}_4$ . Removal of  $\text{CH}_2\text{Cl}_2$  gave the pure product methyl 4-hydroxy-5-methoxybenzoate (5.19 g, 95%) as a light brown solid. To a solution of methyl 4-hydroxy-5-methoxybenzoate (1.82 g, 10 mmol) in  $\text{CHCl}_3$  (25 mL) was slowly added 65%  $\text{HNO}_3$  (400  $\mu\text{L}$ ) at  $0\text{ }^\circ\text{C}$ , and the mixture was warmed to room temperature. After stirring at  $25\text{ }^\circ\text{C}$  for 2 h, a yellowish precipitate was formed, and the solid was filtered off to give title compound **16** (2.06 g, 91%) as a yellow solid. MS (ESI):  $m/z$  calcd for  $\text{C}_9\text{H}_8\text{NO}_6$   $[\text{M}+\text{H}]^-$ : 226.0352; found: 226.1539.

**Methyl 3-amino-4-hydroxy-5-methoxybenzoate (17a).** To a solution of **16** (113 mg, 0.5 mmol) in  $\text{MeOH}$  (12 mL) was added 10%  $\text{Pd/C}$  (11 mg) and the suspension was stirred for 3 h under an atmosphere of hydrogen. After filtration, the solvent was removed under vacuum to give product **17a** (91.6 mg, 93%) without further purification;  $^1\text{H NMR}$  (400 MHz,  $\text{CDCl}_3$ )  $\delta$  7.17 (d,  $J = 1.8\text{ Hz}$ , 1H), 7.10 (d,  $J = 1.8\text{ Hz}$ , 1H), 3.94 (s, 3H), 3.89 (s, 3H);  $^{13}\text{C}$



NMR (101 MHz, CDCl<sub>3</sub>)  $\delta$  167.21 (s), 146.13 (s), 137.03 (s), 133.84 (s), 121.65 (s), 111.23 (s), 103.09 (s), 77.35 (s), 77.03 (s), 76.72 (s), 56.23 (s), 51.93 (s); HRMS (ESI):  $m/z$  calcd for C<sub>9</sub>H<sub>12</sub>NO<sub>4</sub> [M+H]<sup>+</sup>: 198.0766; found: 198.0759.

**2-(trimethylsilyl)ethyl 3-amino-4-hydroxy-5-methoxybenzoate (17b).** To a stirred

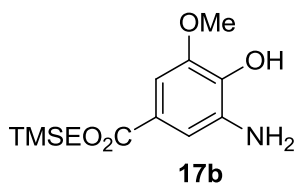

solution of methyl 4-hydroxy-3-methoxy-5-nitrobenzoate **16** (340 mg, 1.5 mmol) in toluene (10 mL) was added 2-(trimethylsilyl)ethanol (236 mg, 2.0 mmol) and Bu<sub>2</sub>SnO (375 mg, 1.5 mmol) respectively. The reaction mixture was heated in a sealed tube at 150 °C for 8 h before the solvent was removed using vacuum distillation. The residue was dissolved in CH<sub>2</sub>Cl<sub>2</sub> the solid was filtered. The filtrate was concentrated in vacuo. Then dissolved in MeOH (12 mL) and added Pd/C (10 mg) and the reaction mixture was stirred under H<sub>2</sub> for 3 h. The reaction mixture was filtered through celite and the filtrate was concentrated in vacuo to afford aniline **17b** (349 mg, 82%), which was used for next step without further purification. <sup>1</sup>H NMR (400 MHz, CDCl<sub>3</sub>)  $\delta$  7.17 (s, 1H), 7.07 (s, 1H), 4.73 (s, 2H), 4.44 – 4.28 (m, 2H), 3.80 (s, 3H), 1.07 (s, 2H), 0.06 (s, 9H). <sup>13</sup>C NMR (101 MHz, CDCl<sub>3</sub>)  $\delta$  166.99 (s), 146.28 (s), 137.30 (s), 133.94 (s), 121.90 (s), 111.34 (s), 103.27 (s), 77.52 (s), 77.20 (s), 76.88 (s), 62.94 (s), 56.06 (s), 29.70 (s), 17.38 (s), -1.43 (s); HRMS (ESI):  $m/z$  calcd for C<sub>13</sub>H<sub>22</sub>NO<sub>4</sub>Si [M+H]<sup>+</sup>: 284.1318; found: 284.1314.

**3,4-dihydroxy-5-nitrobenzoic acid (18).** To a stirred solution of **16** (1.13 g, 5 mmol)

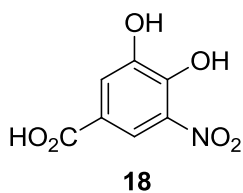

in THF (5 mL) was added an aqueous solution of LiOH (2 M, 5 mL). The resulting mixture was stirred at 45 °C for 4 h. The resulting mixture was then cooled to room temperature, acidified with an aqueous solution of HCl (2 M, 10 mL) and extracted with EtOAc (4 × 20 mL). The combined organic phases were dried over Na<sub>2</sub>SO<sub>4</sub>, filtered and concentrated in vacuo. The residue was suspended in 1,2-dichloroethane (50 mL) at 0 °C and treated with AlCl<sub>3</sub> (2.01 g, 15 mmol) followed by addition of pyridine (2.37 g, 30 mmol) dropwise under argon. The red reaction mixture was heated at reflux for 2 h, then was cooled to room temperature, and poured onto a mixture of ice and 2 N HCl. The resulting yellow precipitate was filtered off, washed with water, and dried under vacuum to give **18** as a yellow solid (847 mg, 85%). <sup>1</sup>H NMR (400 MHz, MeOD)  $\delta$  8.19 (d,  $J$  = 2.0 Hz, 1H), 7.68 (d,  $J$  = 2.0 Hz, 1H). <sup>13</sup>C NMR (126 MHz, MeOD)  $\delta$  166.47 (s), 147.65 (s), 146.75 (s), 134.52 (s), 121.42 (s), 120.41 (s), 117.04 (s), 48.23 – 47.21 (m), 47.12 (s); MS (ESI):  $m/z$  calcd for C<sub>7</sub>H<sub>4</sub>NO<sub>6</sub> [M+H]<sup>-</sup>: 198.0039; found: 198.1052.

**3-amino-4,5-dihydroxybenzoic acid (19).** To a stirred solution of **18** (100 mg, 0.5

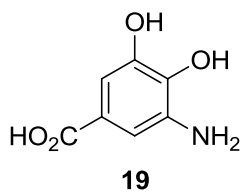

mmol) in MeOH (12 mL) was added Pd/C (10 mg) and the reaction mixture was stirred under H<sub>2</sub> for 3 h. The reaction mixture was filtered through celite and the filtrate was concentrated in vacuo to afford **19** (75 mg, 89%), which was used for next step without further purification. <sup>1</sup>H NMR (400

MHz, DMSO-*d*<sub>6</sub>)  $\delta$  8.52 (d, *J* = 219.0 Hz, 2H), 6.83 (d, *J* = 2.0 Hz, 1H), 6.77 (d, *J* = 2.0 Hz, 1H). <sup>13</sup>C NMR (101 MHz, DMSO-*d*<sub>6</sub>)  $\delta$  168.34 (s), 144.76 (s), 137.28 (s), 136.57 (s), 121.44 (s), 108.60 (s), 106.58 (s); HRMS (ESI): *m/z* calcd for C<sub>7</sub>H<sub>8</sub>NO<sub>4</sub> [M+H]<sup>+</sup>: 170.0453; found: 170.0448.

**Supporting Scheme S5.** Synthesis of anilines **21a** and **21b**.

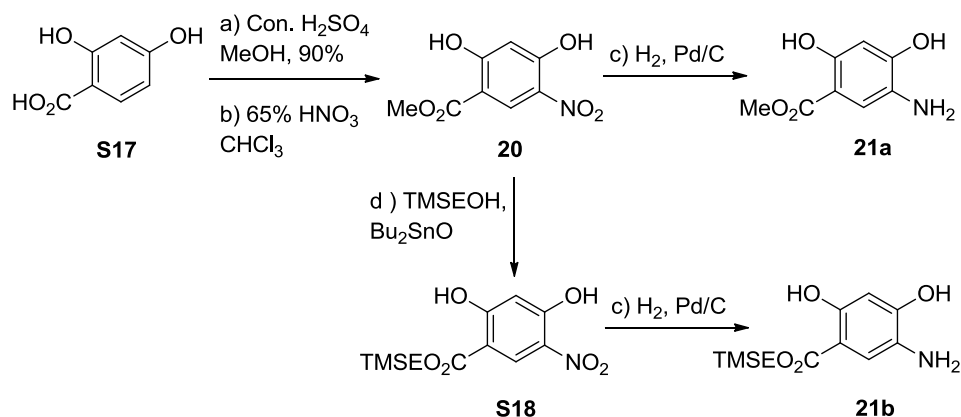

<sup>a</sup> Reagents and conditions: (a) Con.  $\text{H}_2\text{SO}_4$ , MeOH, 80 °C, 24 h, 90%; (b) 65%  $\text{HNO}_3$ ,  $\text{CHCl}_3$ , r.t, 15 min, 42%; (c)  $\text{H}_2$  (1.1 atm.), 10% Pd/C (0.2 equiv.), MeOH, 25 °C, 3 h, 84% (for **21a**); 92% (for **21b**); (d) TMSEOH (1.5 equiv.), toluene,  $\text{Bu}_2\text{SnO}$  (1.0 equiv.), 150 °C, 8 h, 95%;

**Methyl 2,4-dihydroxy-5-nitrobenzoate (20).** To a stirred solution of 2,4-

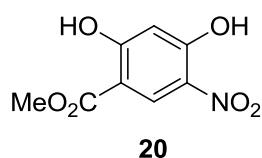

dihydroxybenzoic acid **S17** (4.62 g, 30.0 mmol) in MeOH (60 mL) was added con.  $\text{H}_2\text{SO}_4$  (3 mL). The mixture was heated under reflux for 24 h. The solvent was then removed in vacuo and the residue was dissolved in  $\text{CH}_2\text{Cl}_2$  (100 mL), washed with water ( $3 \times 50$  mL) and dried over anhydrous  $\text{Na}_2\text{SO}_4$ .

Removal of  $\text{CH}_2\text{Cl}_2$  gave the pure product methyl 2,4-dihydroxybenzoate as a light brown solid; To a solution of methyl 2,4-dihydroxybenzoate (1.68 g, 10 mmol) in  $\text{CHCl}_3$  (25 mL) was slowly added 65%  $\text{HNO}_3$  (400  $\mu\text{L}$ ) at 0 °C, and the mixture was warmed to room temperature. After stirring at 25 °C for a further 15 min after which an ochre-colored suspension had formed.  $\text{H}_2\text{O}$  (130 mL) was added, where upon the mixture was aged for another 30 min without stirring. The precipitate was filtered, rinsed with small amounts of  $\text{H}_2\text{O}$ , and dried under vacuum to give crude product, which was recrystallized (MTBE, 250 mL) to give pure **20** (2.68 g, 42%) as pale yellow cubes.

**Methyl 5-amino-2,4-dihydroxybenzoate (21a).** To a stirred solution of **20** (106 mg,

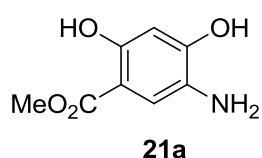

0.5 mmol) in MeOH (12 mL) was added Pd/C (10 mg) and the reaction mixture was stirred under  $\text{H}_2$  for 3 h. The reaction mixture was filtered through celite and the filtrate was concentrated in vacuo to afford **21a** (77 mg, 84%), which was used for next step without further purification. HRMS (ESI):

$m/z$  calcd for  $\text{C}_8\text{H}_{10}\text{NO}_4$   $[\text{M}+\text{H}]^+$ : 184.0610; found: 184.0602.

**2-(trimethylsilyl)ethyl 2,4-dihydroxy-5-nitrobenzoate (S18).** To a stirred solution of methyl 4-hydroxy-3-methoxy-5-nitrobenzoate **20** (320 mg, 1.5 mmol) in toluene (10 mL) was added 2-(trimethylsilyl) ethanol (236 mg, 2.0 mmol) and Bu<sub>2</sub>SnO (375 mg, 1.5 mmol) respectively. The reaction mixture was heated in a sealed tube at 150 °C for 8 h before the solvent was removed using vacuum distillation. The residue was dissolved in CH<sub>2</sub>Cl<sub>2</sub> the solid was filtered. The filtrate was concentrated in vacuo. Flash chromatography on silica gel (ethyl acetate/petroleum ether = 1:10) afforded **S18** (426 mg, 95%).

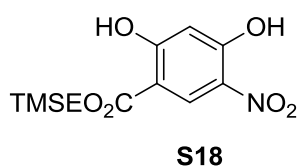

<sup>1</sup>H NMR (400 MHz, CDCl<sub>3</sub>) δ 11.65 (s, 1H), 11.02 (s, 1H), 8.74 (s, 1H), 6.62 (s, 1H), 4.53 – 4.47 (m, 2H), 1.23 – 1.17 (m, 2H), 0.13 (s, 9H). <sup>13</sup>C NMR (101 MHz, CDCl<sub>3</sub>) δ 168.78 (s), 168.02 (s), 160.23 (s), 129.56 (s), 127.29 (s), 107.16 (s), 105.62 (s), 77.36 (s), 77.04 (s), 76.73 (s), 64.99 (s), 29.71 (s), 17.46 (s), -1.50 (s). MS (ESI): m/z calcd for C<sub>12</sub>H<sub>16</sub>NO<sub>6</sub>Si [M+H]<sup>+</sup>: 298.0747; found: 298.0676.

**2-(trimethylsilyl)ethyl 5-amino-2,4-dihydroxybenzoate (21b).** To a stirred solution of **S18** (100 mg, 0.33 mmol) in MeOH (12 mL) was added Pd/C (10 mg) and the reaction mixture was stirred under H<sub>2</sub> for 3 h. The reaction mixture was filtered through celite and the filtrate was concentrated in vacuo to afford **21b** (82 mg, 92%), which was used for next step without further purification.

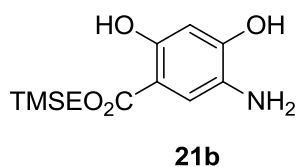

<sup>1</sup>H NMR (400 MHz, CDCl<sub>3</sub>) δ 11.15 (s, 1H), 7.78 (s, 1H), 6.88 (s, 1H), 4.50 – 4.42 (m, 2H), 1.18 – 1.13 (m, 2H), 0.11 (s, 9H). <sup>13</sup>C NMR (101 MHz, CDCl<sub>3</sub>) δ 170.92 (s), 158.10 (s), 154.09 (s), 136.31 (s), 115.51 (s), 108.48 (s), 97.90 (s), 77.37 (s), 77.05 (s), 76.73 (s), 63.73 (s), 37.76 (s), -1.40 (s); HRMS (ESI): m/z calcd for C<sub>12</sub>H<sub>20</sub>NO<sub>4</sub>Si [M+H]<sup>+</sup>: 270.1162; found: 270.1147.

### Supporting Scheme S6. Synthesis of aniline **24**.

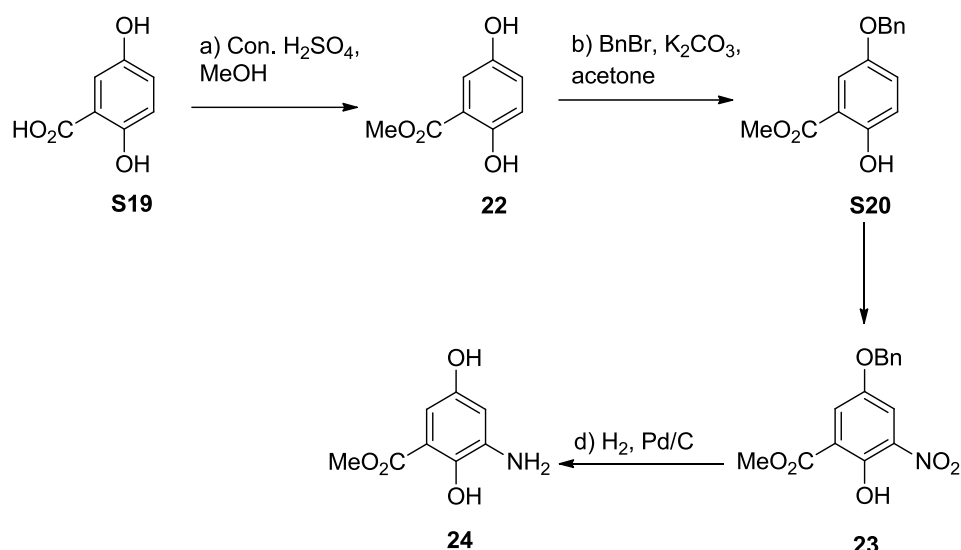

<sup>a</sup> Reagents and conditions: (a)  $\text{Con. H}_2\text{SO}_4$ ,  $\text{MeOH}$ ,  $80^\circ\text{C}$ , 10 h, 80%; (b)  $\text{BnBr}$ ,  $\text{K}_2\text{CO}_3$ , acetone, 3 h, 87%; (c)  $\text{Bi}(\text{NO}_3)_3 \cdot 5 \text{H}_2\text{O}$  (1.0 equiv.),  $\text{MMT K10}$  (1.0 equiv.),  $\text{THF}$ ,  $25^\circ\text{C}$ , 2 h, 81%; (d)  $\text{H}_2$  (1.1 atm.), 10%  $\text{Pd/C}$  (0.2 equiv.),  $\text{MeOH}$ ,  $25^\circ\text{C}$ , 3 h, 87%;

**Methyl 2,5-dihydroxybenzoate (22).** 2,5-dihydroxybenzoic acid **S19** (4.62 g, 30.0 mmol) was dissolved in  $\text{MeOH}$  (60 mL), to which concentrated  $\text{H}_2\text{SO}_4$  (5 mL) was added. The mixture was heated under reflux for 24 h. The solvent was then removed in vacuo and the residue was dissolved in  $\text{CH}_2\text{Cl}_2$  (100 mL), washed with water ( $3 \times 50 \text{ mL}$ ) and dried over anhydrous  $\text{Na}_2\text{SO}_4$ . Removal of  $\text{CH}_2\text{Cl}_2$  and flash chromatography on silica gel (ethyl acetate/petroleum ether = 1:10) afforded the pure product **22** as a light brown solid. Yield: 4.0 g, 80%. MS (ESI):  $m/z$  calcd for  $\text{C}_8\text{H}_7\text{O}_4$  [ $\text{M}+\text{H}$ ]<sup>-</sup>: 167.0344; found: 167.1126.

**Methyl 5-(benzyloxy)-2-hydroxybenzoate (S20).** A suspension of methyl 2,5-dihydroxybenzoate **22** (1.68 g, 10 mmol) and  $\text{K}_2\text{CO}_3$  (2.06 g, 14.7 mmol) in acetone (50 mL) was stirred at rt for 5 min, then  $\text{BnBr}$  (2 mL, 2.55 g, 14.7 mmol) was added and the reaction mixture stirred at  $60^\circ\text{C}$  for 3 h. After cooling to rt the suspension was diluted with  $\text{EtOAc}$  (250 mL), washed with 2 M  $\text{K}_2\text{CO}_3$  ( $3 \times 50 \text{ mL}$ ) and brine (100 mL), dried ( $\text{Na}_2\text{SO}_4$ ), filtered and concentrated in vacuo. Purification via silica gel chromatography (ethyl acetate/petroleum ether = 1:10) yielded **S20** (2.24 g, 87%) as a pale yellow oil. MS (ESI):  $m/z$  calcd for  $\text{C}_{15}\text{H}_{15}\text{O}_4$  [ $\text{M}+\text{H}$ ]<sup>+</sup>: 259.0970; found: 259.0640.

**Methyl 5-(benzyloxy)-2-hydroxy-3-nitrobenzoate (23).** To a suspension of **S20**

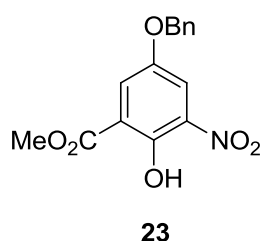

(258 mg, 1.00 mmol) and Montmorillonite K10 (0.50 g) in THF (10 mL) was added bismuth nitrate (0.39 g, 1.00 mmol). The mixture was stirred at room temperature for 2 h and solid was filtered. Solvent was then removed *in vacuo* and the residue was dissolved in CH<sub>2</sub>Cl<sub>2</sub>. The filtrate was washed with 2 M HCl (2 ×10 mL), water (2 ×50 mL) and dried over anhydrous Na<sub>2</sub>SO<sub>4</sub>. Removal of CH<sub>2</sub>Cl<sub>2</sub> gave the pure product

**23** as a yellow solid. Yield: 245 mg, 81%. <sup>1</sup>H NMR (500 MHz, CDCl<sub>3</sub>) δ 11.52 (s, 1H), 7.82 (d, *J* = 13.4 Hz, 2H), 7.44 (s, 4H), 7.39 (s, 1H), 5.10 (s, 2H), 4.02 (s, 3H). <sup>13</sup>C NMR (126 MHz, CDCl<sub>3</sub>) δ 168.57 (s), 150.13 (s), 149.72 (s), 137.57 (s), 135.55 (s), 128.80 (s), 128.53 (s), 127.63 (s), 127.03 (s), 123.00 (s), 117.56 (s), 116.43 (s), 99.99 (s), 77.29 (s), 77.03 (s), 76.78 (s), 71.27 (s), 53.19 (s). MS (ESI): *m/z* calcd for C<sub>15</sub>H<sub>12</sub>NO<sub>6</sub>[M+H]<sup>+</sup>: 302.0665; found: 302.1690.

**Methyl 3-amino-2,5-dihydroxybenzoate (24).** To a stirred solution of **23** (100 mg,

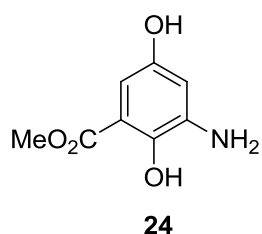

0.33 mmol) in MeOH (12 mL) was added Pd/C (10 mg) and the reaction mixture was stirred under H<sub>2</sub> for 3 h. The reaction mixture was filtered through celite and the filtrate was concentrated *in vacuo* to afford **24** (52.5 mg, 87%), which was used for next step without further purification; <sup>1</sup>H NMR (400 MHz, CDCl<sub>3</sub>) δ 7.23 (d, *J* = 8.5 Hz, 2H), 3.87 (s, 3H); <sup>13</sup>C NMR (101 MHz, CDCl<sub>3</sub>) δ 166.42 (s), 149.46 (s), 136.02 (s), 135.39 (s), 122.17 (s), 112.81 (s), 107.07 (s), 77.32 (s), 77.01 (s), 76.69 (s), 52.15 (s); HRMS (ESI): *m/z* calcd for C<sub>8</sub>H<sub>10</sub>NO<sub>4</sub>[M+H]<sup>+</sup>: 184.0610; found: 184.0605.

**Methyl**

**3-(3-((4S,4aR,5S,7R,8S,9aS)-4,8-dimethyl-3-oxo-3,4,4a,5,6,7,8,9-octahydro-5,8-epoxy-7,9a-methanobenzo[7]annulen-4-yl)propanamido)-5-fluoro-2,4-dihydroxybenzoate (7a).** To a solution of carboxylic acid PTMA (58.0 mg, 0.20 mmol) and aniline

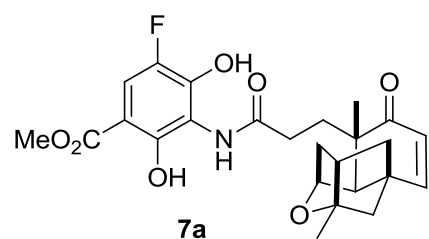

**6** (80.4 mg, 0.40 mmol) in DMF (2.0 mL) at room temperature were added Et<sub>3</sub>N (84.0 μL, 0.6 mmol) and HATU (152.2 mg, 0.40 mmol). The mixture was stirred for 12 h, after which brine (5.0 mL) was added. The resulting mixture was extracted with CH<sub>2</sub>Cl<sub>2</sub> (3×5.0 mL), and the combined organic portions dried over anhydrous Na<sub>2</sub>SO<sub>4</sub>.

Concentration followed by flash column chromatography (eluent: EtOAc/light petroleum ether = 1:10~ 1:3) afforded the title compound **7a** (78.5 mg, 83%); <sup>1</sup>H NMR (400 MHz, CDCl<sub>3</sub>) δ 11.45 (s, 1H), 8.25 (s, 1H), 7.37 (d, *J* = 10.8 Hz, 1H), 6.53 (d, *J* = 10.1 Hz, 1H), 5.95 (d, *J* = 10.1 Hz, 1H), 4.46 (s, 1H), 3.94 (s, 3H), 2.59 – 2.50 (m, 1H), 2.44 (d, *J* = 5.0 Hz, 1H), 2.43 – 2.39 (m, 1H), 2.37 (dd, *J* = 6.5, 4.0 Hz, 2H), 2.13 (d, *J* = 5.3 Hz, 1H), 2.09 (d, *J* = 3.6 Hz, 1H), 2.05 (dd, *J* = 13.3, 7.4 Hz, 2H),

1.94 (d,  $J = 6.0$  Hz, 1H), 1.93 – 1.89 (m, 1H), 1.88 (d,  $J = 3.4$  Hz, 1H), 1.82 (d,  $J = 6.8$  Hz, 1H), 1.65 (d,  $J = 11.2$  Hz, 1H), 1.47 (s, 3H), 1.29 (s, 3H);  $^{13}\text{C}$  NMR (101 MHz,  $\text{CDCl}_3$ )  $\delta$  203.77 (s), 174.09 (s), 170.11 (s), 154.03 (s), 149.76 (s), 147.85 (s), 145.49 (s), 144.59 (d,  $J = 16.4$  Hz), 127.10 (s), 115.87 (s), 111.75 (s), 111.54 (s), 102.00 (d,  $J = 7.7$  Hz), 87.14 (s), 77.30 (d,  $J = 11.6$  Hz), 77.04 (s), 76.73 (s), 76.42 (s), 54.86 (s), 52.48 (s), 46.73 (s), 46.14 (d,  $J = 5.9$  Hz), 44.64 (s), 43.11 (s), 40.58 (s), 32.06 (s), 31.56 (s), 24.20 (s), 22.98 (s); HRMS (ESI):  $m/z$  calcd for  $\text{C}_{25}\text{H}_{29}\text{FNO}_7$   $[\text{M}+\text{H}]^+$ : 474.1928; found: 474.1916.

**3-(3-((4S,4aR,5S,7R,8S,9aS)-4,8-dimethyl-3-oxo-3,4,4a,5,6,7,8,9-octahydro-5,8-epoxy-7,9a-methanobenzo[7]annulen-4-yl)propanamido)-5-fluoro-2,4-dihydroxybenzoic acid (7b).** To a stirred solution of **7a** (47.4 mg, 0.1 mmol) in MeOH (2 mL) was

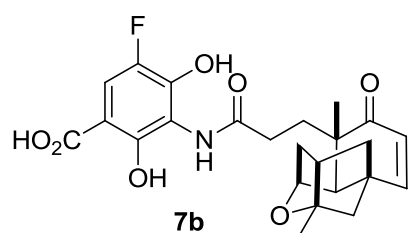

added aqueous solution of KOH (2 mL). The resulting mixture was stirred at 45 °C for 4 h. The resulting mixture was then cooled to room temperature, acidified with an aqueous solution of HCl (2 M, 5 mL) and extracted with EtOAc (4 × 20 mL). The combined organic phases were dried over

$\text{Na}_2\text{SO}_4$ , filtered. Concentration followed by flash column chromatography (eluent: light petroleum ether/EtOAc/AcOH = 2: 3: 0.5) afforded the title compound **7b** (40.9 mg, 89%);  $^1\text{H}$  NMR (500 MHz,  $\text{DMSO}-d_6$ )  $\delta$  10.45 (s, 1H), 9.25 (d,  $J = 5.3$  Hz, 1H), 7.41 (d,  $J = 9.9$  Hz, 1H), 6.67 (d,  $J = 7.7$  Hz, 1H), 5.84 (d,  $J = 8.8$  Hz, 1H), 4.39 (s, 1H), 3.16 (d,  $J = 8.3$  Hz, 1H), 2.43 – 2.31 (m, 3H), 2.27 (s, 2H), 2.09 (s, 3H), 2.01 – 1.86 (m, 5H), 1.80 (s, 2H), 1.69 (s, 4H), 1.36 (d,  $J = 6.7$  Hz, 3H), 1.14 (s, 3H);  $^{13}\text{C}$  NMR (126 MHz,  $\text{DMSO}-d_6$ )  $\delta$  203.37 (s), 172.69 (s), 171.97 (s), 155.57 (s), 155.26 (d,  $J = 78.6$  Hz), 147.78 (s), 145.80 (s), 143.96 (s), 126.94 (s), 115.38 (s), 113.43 (s), 103.40 (s), 86.82 (s), 75.96 (s), 54.70 (s), 49.05 (s), 46.28 (s), 46.62 – 45.46 (m), 46.06 (s), 44.71 (s), 42.81 (s), 31.48 (s), 30.76 (s), 24.67 (s), 23.40 (s); HRMS (ESI):  $m/z$  calcd for  $\text{C}_{24}\text{H}_{27}\text{FNO}_7$   $[\text{M}+\text{H}]^+$ : 460.1772; found: 460.1759.

**3-(3-((4S,4aR,5S,7R,8S,9aS)-4,8-dimethyl-3-oxo-3,4,4a,5,6,7,8,9-octahydro-5,8-epoxy-7,9a-methanobenzo[7]annulen-4-yl)propanamido)-2,4-dihydroxy-5-iodobenzoic acid (8).** To a mixture of iodine (38.1 mg, 0.30 mmol), DMAP (24.4 mg, 0.20

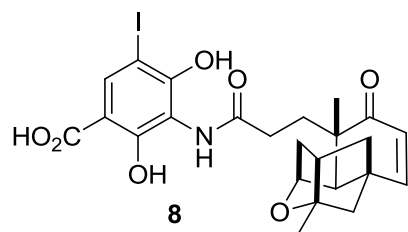

mmol), in 25 mL (pyridine/ $\text{CCl}_4$  = 4:1) was added PTM (44.1 mg, 0.10 mmol) at room temperature under nitrogen. The resultant mixture was stirred at 110 °C for 4 h under nitrogen. TLC showed the starting material disappeared. The mixture was poured into 50 mL saturated  $\text{Na}_2\text{S}_2\text{O}_3$  at 0 °C and the solid was removed by filtration, the filtrate was

extracted with EtOAc (4 × 20 mL), then concentrated in vacuo and purified by flash chromatography (eluent: light petroleum ether/EtOAc/AcOH = 2: 3: 0.5) providing the title compound **8** (50 mg, 88%).  $^1\text{H}$  NMR (500 MHz,  $\text{DMSO}-d_6$ )  $\delta$  10.54 (s, 1H), 9.24 (s, 1H), 8.00 (s, 1H), 6.68 (d,  $J = 10.0$  Hz, 1H), 5.84 (d,  $J = 10.0$  Hz, 1H), 4.39 (s,

1H), 2.43 (t,  $J = 12.3$  Hz, 1H), 2.35 (d,  $J = 5.8$  Hz, 1H), 2.28 (s, 1H), 2.13 (d,  $J = 5.2$  Hz, 1H), 2.12 (d,  $J = 8.3$  Hz, 1H), 2.08 (s, 1H), 2.01 (s, 1H), 1.99 (s, 2H), 1.96 (s, 1H), 1.94 (s, 2H), 1.82 – 1.77 (m, 1H), 1.70 (s, 3H), 1.36 (s, 3H), 1.15 (s, 3H);  $^{13}\text{C}$  NMR (126 MHz, DMSO- $d_6$ )  $\delta$  203.42 (s), 173.29 (s), 171.42 (s), 159.04 (s), 158.30 (s), 154.94 (s), 137.69 (s), 126.96 (s), 113.45 (s), 107.45 (s), 86.83 (s), 75.96 (s), 74.21 (s), 54.74 (s), 46.37 – 45.93 (m), 44.73 (s), 42.81 (s), 40.86 – 40.12 (m), 39.98 (s), 39.81 (s), 39.65 (s), 39.48 (s), 31.28 (s), 30.74 (s), 24.70 (s), 23.39 (s); HRMS (ESI):  $m/z$  calcd for  $\text{C}_{24}\text{H}_{27}\text{INO}_7$   $[\text{M}+\text{H}]^+$ : 568.0832; found: 568.0829.

**3-(3-((4S,4aR,5S,7R,8S,9aS)-4,8-dimethyl-3-oxo-3,4,4a,5,6,7,8,9-octahydro-5,8-epoxy-7,9a-methanobenzo[7]annulen-4-yl)propanamido)-2,4-dihydroxy-5-nitrobenzoic acid (9)** . To a solution of PTM (44.1 mg, 0.10 mmol) in  $\text{CHCl}_3$  (25 mL) was

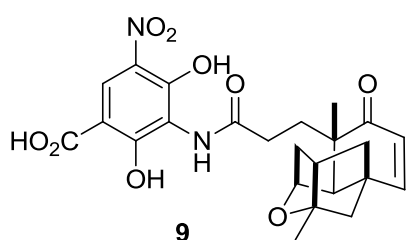

slowly added 65%  $\text{HNO}_3$  (20  $\mu\text{L}$ ) at 0  $^\circ\text{C}$ , and the mixture was warmed to room temperature. After stirring at 25  $^\circ\text{C}$  for 5 minutes, a yellowish precipitate was formed, and the solid was filtered off, the residue so obtained was purified by flash column chromatography (eluent: light petroleum ether/EtOAc/AcOH = 2: 3: 0.5) to give the title

compound **9** (40.9 mg, 84%) as a yellow solid.  $^1\text{H}$  NMR (500 MHz, MeOD)  $\delta$  8.72 (s, 1H), 6.68 (d,  $J = 9.6$  Hz, 1H), 5.92 (d,  $J = 9.4$  Hz, 1H), 4.55 (s, 1H), 2.46 (s, 1H), 2.44 (s, 1H), 2.33 (s, 1H), 2.31 (s, 1H), 2.13 (d,  $J = 11.5$  Hz, 1H), 2.11 (s, 1H), 2.09 (s, 1H), 1.87 (d,  $J = 13.5$  Hz, 2H), 1.83 (s, 1H), 1.76 (d,  $J = 10.9$  Hz, 1H), 1.46 (s, 3H), 1.28 (s, 3H);  $^{13}\text{C}$  NMR (126 MHz, MeOD)  $\delta$  204.31 (s), 173.85 (s), 166.04 – 165.48 (m), 154.98 – 154.78 (m), 154.67 (s), 130.99 – 130.96 (m), 129.46 – 129.42 (m), 128.48 (s), 127.16 (s), 112.90 – 112.37 (m), 87.34 (s), 76.61 (s), 54.42 (s), 48.14 (s), 47.97 (s), 47.80 (s), 47.62 (s), 47.45 (s), 47.28 (s), 47.11 (s), 46.38 (s), 45.94 (d,  $J = 6.7$  Hz), 44.72 (s), 42.51 (s), 40.09 (s), 31.47 (s), 30.63 (s), 23.76 (s), 21.83 (s); HRMS (ESI):  $m/z$  calcd for  $\text{C}_{24}\text{H}_{27}\text{N}_2\text{O}_9$   $[\text{M}+\text{H}]^+$ : 487.1717; found: 487.1710.

**3-(3-((4S,4aR,5S,7R,8S,9aS)-4,8-dimethyl-3-oxo-3,4,4a,5,6,7,8,9-octahydro-5,8-epoxy-7,9a-methanobenzo[7]annulen-4-yl)propanamido)-2,4-dihydroxy-5-(methoxymethyl)benzoic acid (10a)**. To a mixture of formaldehyde (50  $\mu\text{L}$ , 0.50 mmol),

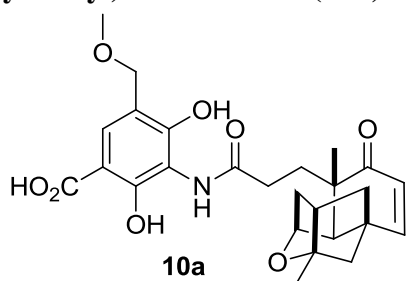

KOH (16.8 mg, 0.30 mmol) and  $\text{CaCl}_2$  (34 mg, 0.30 mmol) in 2 mL MeOH was added PTM (44.1 mg, 0.10 mmol). The resultant mixture was stirred at room temperature for 4 h. TLC showed the starting material disappeared. The mixture was added 2 mL  $\text{NH}_3 \cdot \text{H}_2\text{O}$  then acidified with an aqueous solution of HCl (2 M, 5 mL) and extracted with EtOAc (4  $\times$  20

mL), then concentrated in vacuo and purified by flash chromatography (eluent: light petroleum ether/EtOAc/AcOH = 2: 3: 0.5) providing the title compound **10a** (43.7 mg, 90%);  $^1\text{H}$  NMR (400 MHz, DMSO- $d_6$ )  $\delta$  9.42 (s, 1H), 7.48 (s, 1H), 6.69 (d,  $J = 10.0$  Hz, 1H), 5.85 (d,  $J = 10.0$  Hz, 1H), 4.43 (s, 1H), 4.28 (s, 2H), 3.23 (s, 3H), 2.36 (t,  $J =$



6.4 Hz, 1H), 2.29 (s, 1H), 2.19 – 2.09 (m, 2H), 1.98 (dd,  $J = 15.8, 11.7$  Hz, 3H), 1.81 (d,  $J = 8.6$  Hz, 1H), 1.72 (d,  $J = 9.9$  Hz, 3H), 1.68 – 1.60 (m, 1H), 1.37 (s, 3H), 1.15 (s, 3H);  $^{13}\text{C}$  NMR (126 MHz, DMSO- $d_6$ )  $\delta$  203.31 (s), 173.48 (s), 172.36 (s), 159.74 (s), 154.98 (s), 152.08 – 151.92 (m), 132.01 (s), 132.01 (s), 129.13 (s), 128.82 – 128.66 (m), 126.93 (s), 114.01 (s), 110.43 (s), 100.07 – 99.90 (m), 86.80 (s), 75.97 (s), 69.67 (s), 65.50 (s), 57.43 (s), 54.65 (s), 46.41 (s), 46.06 (s), 44.71 (s), 42.81 (s), 40.64 (s), 40.54 (s), 40.37 (s), 40.21 (s), 40.04 (s), 31.85 (s), 31.07 (s), 30.46 (s), 24.63 (s), 23.42 (s), 19.12 (s); HRMS (ESI):  $m/z$  calcd for  $\text{C}_{26}\text{H}_{32}\text{NO}_8$   $[\text{M}+\text{H}]^+$ : 486.2128; found: 486.2118.

**3-(3-((4S,4aR,5S,7R,8S,9aS)-4,8-dimethyl-3-oxo-3,4,4a,5,6,7,8,9-octahydro-5,8-epoxy-7,9a-methanobenzo[7]annulen-4-yl)propanamido)-2,4-dihydroxy-5-(hydroxymethyl)benzoic acid (10b).**

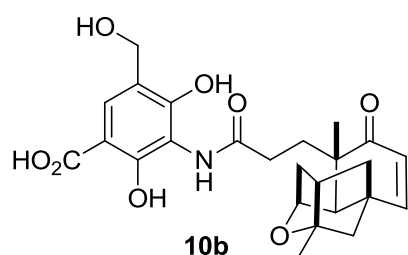

To a mixture of formaldehyde (50  $\mu\text{L}$ , 0.50 mmol), KOH (16.8 mg, 0.30 mmol) and  $\text{CaCl}_2$  (34 mg, 0.30 mmol) in 2 mL MeOH was added PTM (44.1 mg, 0.10 mmol). The resultant mixture was stirred at room temperature for 4 h. TLC showed the starting material disappeared. Without any post-processing, the mixture was immediately purified by flash chromatography (eluent: EtOAc/MeOH = 6: 1) and

providing the title compound **10b** (43.3 mg, 92%);  $^1\text{H}$  NMR (400 MHz, DMSO- $d_6$ )  $\delta$  9.77 (d,  $J = 12.2$  Hz, 1H), 9.30 (s, 1H), 7.66 (s, 1H), 6.68 (d,  $J = 10.0$  Hz, 1H), 5.84 (d,  $J = 10.0$  Hz, 1H), 4.43 (d,  $J = 12.1$  Hz, 3H), 2.35 (t,  $J = 6.0$  Hz, 1H), 2.28 (s, 1H), 2.13 (t,  $J = 11.6$  Hz, 2H), 1.99 (d,  $J = 11.9$  Hz, 1H), 1.95 (d,  $J = 11.6$  Hz, 1H), 1.83 – 1.76 (m, 1H), 1.70 (s, 2H), 1.36 (s, 3H), 1.23 (s, 3H);  $^{13}\text{C}$  NMR (101 MHz, DMSO- $d_6$ )  $\delta$  203.37 (s), 173.35 (s), 173.01 (s), 172.50 (s), 154.97 (s), 126.94 (s), 120.88 (s), 113.39 (s), 113.23 (s), 106.16 (s), 86.80 (s), 79.70 (s), 75.94 (s), 58.52 (s), 54.68 (s), 46.36 – 45.91 (m), 44.71 (s), 42.79 (s), 41.05 – 40.19 (m), 40.34 (s), 40.24 (d,  $J = 21.0$  Hz), 39.95 (s), 39.82 (d,  $J = 21.0$  Hz), 39.53 (s), 39.40 (d,  $J = 21.0$  Hz), 31.56 (s), 30.86 (s), 29.46 (d,  $J = 13.0$  Hz), 24.70 (s), 23.41 (s), 22.58 (s), 21.58 (s); HRMS (ESI):  $m/z$  calcd for  $\text{C}_{25}\text{H}_{30}\text{NO}_8$   $[\text{M}+\text{H}]^+$ : 472.1971; found: 472.1969.

**2-(trimethylsilyl)ethyl**

**3-(3-((4S,4aR,5S,7R,8S,9aS)-4,8-dimethyl-3-oxo-3,4,4a,5,6,7,8,9-octahydro-5,8-epoxy-7,9a-methanobenzo[7]annulen-4-yl)propanamido)-2-hydroxy-5-methoxybenzoate (25a).**

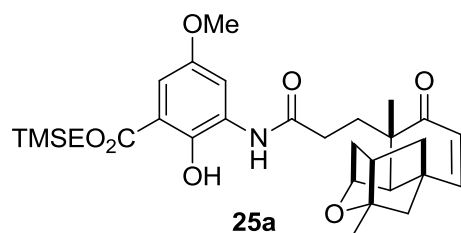

To a solution of carboxylic acid PTMA (58.0 mg, 0.20 mmol) and aniline **13** (113.2 mg, 0.40 mmol) in  $\text{CH}_2\text{Cl}_2$  (2.0 mL) at room temperature were added  $\text{Et}_3\text{N}$  (84.0  $\mu\text{L}$ , 0.60 mmol) and HATU (152.2 mg, 0.40 mmol). The mixture was stirred for 12 h, after which brine (5.0 mL) was added. The resulting mixture was extracted with  $\text{CH}_2\text{Cl}_2$  (3  $\times$  5.0

mL), and the combined organic portions dried over anhydrous  $\text{Na}_2\text{SO}_4$ . Concentration followed by flash column chromatography (eluent: EtOAc/light petroleum ether =

1:10~ 1:3) afforded the title compound **25a** (95.5 mg, 86%);  $^1\text{H}$  NMR (400 MHz,  $\text{CDCl}_3$ )  $\delta$  10.97 (s, 1H), 8.32 (d,  $J = 2.8$  Hz, 1H), 7.99 (s, 1H), 7.01 (d,  $J = 2.9$  Hz, 1H), 6.50 (d,  $J = 10.1$  Hz, 1H), 5.92 (d,  $J = 10.1$  Hz, 1H), 4.46 (t,  $J = 8.3$  Hz, 3H), 3.78 (s, 3H), 2.43 (d,  $J = 6.5$  Hz, 1H), 2.40 (d,  $J = 9.4$  Hz, 2H), 2.33 (dd,  $J = 12.4, 2.4$  Hz, 1H), 2.27 (dd,  $J = 13.4, 2.0$  Hz, 1H), 2.09 (dd,  $J = 8.6, 4.3$  Hz, 1H), 2.03 (dd,  $J = 11.8, 7.6$  Hz, 2H), 1.87 (dd,  $J = 11.2, 3.1$  Hz, 2H), 1.82 – 1.75 (m, 1H), 1.63 (d,  $J = 11.1$  Hz, 1H), 1.45 (s, 3H), 1.27 (s, 3H), 1.18 – 1.14 (m, 2H), 0.10 (s, 9H);  $^{13}\text{C}$  NMR (101 MHz,  $\text{CDCl}_3$ )  $\delta$  203.81 (s), 171.07 (s), 170.32 (s), 153.76 (s), 151.74 (s), 144.95 (s), 128.14 (s), 127.20 (s), 112.77 (s), 111.45 (s), 106.49 (s), 86.98 (s), 77.38 (s), 77.06 (s), 76.75 (s), 76.48 (s), 64.12 (s), 55.87 (s), 54.88 (s), 46.65 (s), 46.11 (d,  $J = 8.4$  Hz), 44.67 (s), 43.12 (s), 40.56 (s), 32.94 (s), 31.30 (s), 29.70 (s), 24.33 (s), 23.02 (s), 17.31 (s), -1.43 (s); HRMS (ESI):  $m/z$  calcd for  $\text{C}_{30}\text{H}_{42}\text{NO}_7\text{Si}$   $[\text{M}+\text{H}]^+$ : 556.2731; found: 556.2726.

### Methyl

#### 3-(3-((4S,4aR,5S,7R,8S,9aS)-4,8-dimethyl-3-oxo-3,4,4a,5,6,7,8,9-octahydro-5,8-epoxy-7,9a-methanobenzo[7]annulen-4-yl)propanamido)-2,6-dihydroxybenzoate

(**26a**). To a solution of carboxylic acid PTMA (29.0 mg, 0.10 mmol) and aniline **15a** (36.6 mg, 0.20 mmol) in DMF (1.0 mL) at room temperature were added  $\text{Et}_3\text{N}$  (42.1  $\mu\text{L}$ , 0.30 mmol) and HATU (76.1 mg, 0.20 mmol). The mixture was stirred for 12 h, after which brine (5.0 mL) was added. The resulting mixture was extracted with EtOAc (3  $\times$  5.0 mL), and the combined

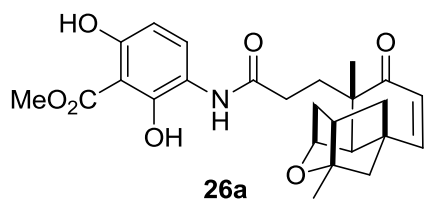

organic portions dried over anhydrous  $\text{Na}_2\text{SO}_4$ . Concentration followed by flash column chromatography (eluent: EtOAc/light petroleum ether = 1:10~ 1:3) afforded the title compound **26a** (33.7 mg, 74%);  $^1\text{H}$  NMR (400 MHz,  $\text{CDCl}_3$ )  $\delta$  10.32 (s, 1H), 9.06 (s, 1H), 8.38 (d,  $J = 9.1$  Hz, 1H), 6.51 (d,  $J = 9.2$  Hz, 2H), 5.93 (d,  $J = 10.1$  Hz, 1H), 4.47 (s, 1H), 4.11 (s, 3H), 2.48 – 2.40 (m, 2H), 2.38 (d,  $J = 7.8$  Hz, 2H), 2.34 (s, 1H), 2.23 (d,  $J = 13.2$  Hz, 1H), 2.09 (d,  $J = 2.9$  Hz, 1H), 2.04 (dd,  $J = 13.6, 7.5$  Hz, 2H), 1.92 – 1.84 (m, 2H), 1.83 – 1.73 (m, 2H), 1.64 (d,  $J = 11.1$  Hz, 1H), 1.46 (s, 3H), 1.27 (s, 3H);  $^{13}\text{C}$  NMR (101 MHz,  $\text{CDCl}_3$ )  $\delta$  204.07 (s), 170.88 (s), 169.94 (s), 155.68 (s), 153.89 (s), 149.60 (s), 128.46 (s), 127.20 (s), 119.54 (s), 107.51 (s), 99.43 (s), 86.98 (s), 77.30 (d,  $J = 11.6$  Hz), 77.04 (s), 76.73 (s), 76.50 (s), 54.90 (s), 53.10 (s), 46.80 (s), 46.10 (d,  $J = 3.2$  Hz), 44.67 (s), 43.12 (s), 40.57 (s), 32.89 (s), 31.56 (s), 29.71 (s), 24.33 (s), 23.03 (s); HRMS (ESI):  $m/z$  calcd for  $\text{C}_{25}\text{H}_{30}\text{NO}_7$   $[\text{M}+\text{H}]^+$ : 456.2022; found: 456.2015.

**3-(3-((4S,4aR,5S,7R,8S,9aS)-4,8-dimethyl-3-oxo-3,4,4a,5,6,7,8,9-octahydro-5,8-epoxy-7,9a-methanobenzo[7]annulen-4-yl)propanamido)-2,6-dihydroxybenzoic acid (26b).**

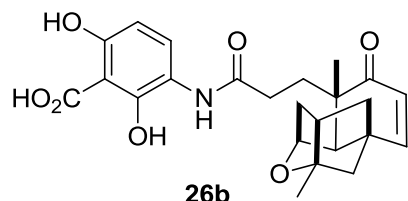

To a solution of carboxylic acid PTMA (29.0 mg, 0.10 mmol) and PyBOP (52.0 mg, 0.10 mmol) in  $\text{CH}_2\text{Cl}_2$  (2.0 mL) at room temperature were added  $\text{Et}_3\text{N}$  (42.1  $\mu\text{L}$ , 0.30 mmol). The mixture was stirred for 5 minutes, after which aniline **15b** (33.8 mg, 0.20 mmol) in 0.5 mL DMF was added. The mixture was stirred for extra 20 minutes, after which brine (5.0 mL) was added. The

resulting mixture was extracted with  $\text{EtOAc}$  ( $3 \times 5.0$  mL), and the combined organic portions dried over anhydrous  $\text{Na}_2\text{SO}_4$ . Concentration followed by flash column chromatography (eluent: light petroleum ether/ $\text{EtOAc}/\text{AcOH} = 2:3:0.5$ ) afforded the title compound **26b** (35.3 mg, 80%);  $^1\text{H}$  NMR (400 MHz,  $\text{MeOD}$ )  $\delta$  7.59 (d,  $J = 8.8$  Hz, 1H), 6.67 (d,  $J = 10.1$  Hz, 1H), 6.25 (d,  $J = 8.8$  Hz, 1H), 5.91 (d,  $J = 10.1$  Hz, 1H), 4.54 (s, 1H), 2.46 (s, 2H), 2.43 – 2.36 (m, 1H), 2.34 – 2.28 (m, 1H), 2.27 (d,  $J = 2.2$  Hz, 2H), 2.10 (dd,  $J = 13.1, 4.9$  Hz, 3H), 1.92 – 1.84 (m, 3H), 1.82 (d,  $J = 3.4$  Hz, 1H), 1.77 (d,  $J = 2.1$  Hz, 1H), 1.73 (d,  $J = 6.4$  Hz, 1H), 1.46 (d,  $J = 4.8$  Hz, 3H), 1.28 (s, 3H);  $^{13}\text{C}$  NMR (101 MHz,  $\text{MeOD}$ )  $\delta$  204.35 (s), 172.84 (s), 164.31 – 163.11 (m), 163.74 – 162.48 (m), 159.11 – 157.84 (m), 154.63 (s), 130.96 (s), 128.47 (s), 126.49 (s), 116.96 – 115.41 (m), 104.29 (s), 87.33 (s), 76.63 (s), 65.26 (s), 54.42 (s), 46.47 (s), 45.88 (s), 45.83 (s), 44.70 (s), 42.50 (s), 40.09 (s), 31.47 (s), 31.32 (s), 30.31 (s), 23.78 (s), 21.80 (s), 18.87 (s); HRMS (ESI):  $m/z$  calcd for  $\text{C}_{24}\text{H}_{28}\text{NO}_7$   $[\text{M}+\text{H}]^+$ : 442.1866; found: 442.1856.

### Methyl

**3-(3-((4S,4aR,5S,7R,8S,9aS)-4,8-dimethyl-3-oxo-3,4,4a,5,6,7,8,9-octahydro-5,8-epoxy-7,9a-methanobenzo[7]annulen-4-yl)propanamido)-4-hydroxy-5-methoxybenzoate (27a).**

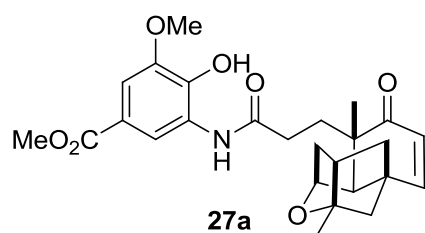

**17a** (36.6 mg, 0.20 mmol) in DMF (1.0 mL) at room temperature were added  $\text{Et}_3\text{N}$  (42.1  $\mu\text{L}$ , 0.30 mmol) and HATU (76.1 mg, 0.20 mmol). The mixture was stirred for 12 h, after which brine (5.0 mL) was added. The resulting mixture was extracted with  $\text{EtOAc}$  ( $3 \times 5.0$  mL), and the combined organic portions dried over anhydrous

$\text{Na}_2\text{SO}_4$ . Concentration followed by flash column chromatography (eluent:  $\text{EtOAc}/\text{light petroleum ether} = 1:10 \sim 1:3$ ) afforded the title compound **27a** (32.9 mg, 70%);  $^1\text{H}$  NMR (400 MHz,  $\text{CDCl}_3$ )  $\delta$  8.20 (d,  $J = 1.6$  Hz, 1H), 8.12 (s, 1H), 7.73 (s, 1H), 7.39 (d,  $J = 1.7$  Hz, 1H), 6.53 (d,  $J = 10.1$  Hz, 1H), 5.94 (d,  $J = 10.1$  Hz, 1H), 4.47 (s, 1H), 3.95 (s, 3H), 3.89 (s, 3H), 2.44 (d,  $J = 6.3$  Hz, 2H), 2.39 (s, 1H), 2.36 – 2.32 (m, 1H), 2.09 (d,  $J = 3.5$  Hz, 1H), 2.07 – 2.02 (m, 2H), 1.90 (s, 1H), 1.87 (d,  $J = 3.4$  Hz, 1H), 1.82 (s, 2H), 1.64 (d,  $J = 11.2$  Hz, 1H), 1.46 (s, 2H), 1.43 (d,  $J = 7.3$  Hz, 1H), 1.28 (s, 3H);  $^{13}\text{C}$  NMR (101 MHz,  $\text{CDCl}_3$ )  $\delta$  204.28 (s), 172.21 (s), 166.85 (s), 154.16 (s), 147.46 (s), 140.32 – 140.28 (m), 127.12 (s), 125.67 (s), 121.62 (s), 116.00

(s), 108.27 (s), 87.07 (s), 56.35 (s), 54.86 (s), 52.08 (s), 46.86 (s), 46.11 (s), 44.66 (s), 44.42 (s), 43.09 (s), 40.56 (s), 32.58 (s), 31.53 (s), 29.70 (s), 24.28 (s), 23.00 (s); HRMS (ESI):  $m/z$  calcd for  $C_{26}H_{32}NO_7$  [M+H]<sup>+</sup>: 470.2179; found: 470.2173.

## 2-(trimethylsilyl)ethyl

**3-(3-((4S,4aR,5S,7R,8S,9aS)-4,8-dimethyl-3-oxo-3,4,4a,5,6,7,8,9-octahydro-5,8-epoxy-7,9a-methanobenzo[7]annulen-4-yl)propanamido)-4-hydroxy-5-methoxybenzoate (27b)**. To a solution of carboxylic acid PTMA (58.0 mg, 0.20 mmol) and aniline

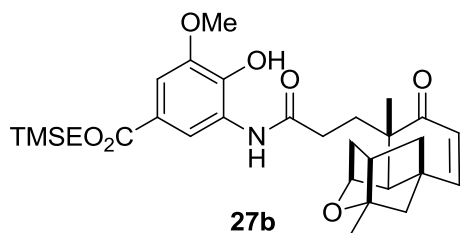

**17b** (113.2 mg, 0.40 mmol) in DMF (2.0 mL) at room temperature were added Et<sub>3</sub>N (84.0  $\mu$ L, 0.60 mmol) and HATU (152.2 mg, 0.40 mmol). The mixture was stirred for 12 h, after which brine (5.0 mL) was added. The resulting mixture was extracted with EtOAc (3  $\times$  5.0 mL), and the combined organic portions dried over

anhydrous Na<sub>2</sub>SO<sub>4</sub>. Concentration followed by flash column chromatography (eluent: EtOAc/light petroleum ether = 1:10~ 1:3) afforded the title compound **27b** (88.8 mg, 80%); <sup>1</sup>H NMR (500 MHz, CDCl<sub>3</sub>)  $\delta$  8.43 (s, 1H), 8.07 (s, 1H), 7.34 (s, 1H), 6.47 (d,  $J$  = 3.8 Hz, 1H), 5.87 (d,  $J$  = 5.2 Hz, 1H), 4.45 (s, 1H), 4.40 – 4.31 (m, 2H), 3.88 (s, 3H), 2.43 – 2.37 (m, 2H), 2.35 (s, 1H), 2.31 (s, 1H), 2.24 (d,  $J$  = 12.4 Hz, 1H), 2.07 (d,  $J$  = 5.0 Hz, 1H), 2.04 – 1.99 (m, 2H), 1.96 (d,  $J$  = 4.9 Hz, 1H), 1.85 (dd,  $J$  = 16.7, 8.8 Hz, 2H), 1.75 (d,  $J$  = 5.3 Hz, 1H), 1.60 (d,  $J$  = 10.4 Hz, 1H), 1.42 (s, 3H), 1.24 (s, 3H), 1.13 – 1.07 (m, 2H), 0.06 (s, 9H); <sup>13</sup>C NMR (126 MHz, CDCl<sub>3</sub>)  $\delta$  204.17 (s), 172.46 (s), 170.70 (s), 166.53 (s), 154.14 (s), 147.77 (s), 140.76 (s), 127.07 (s), 121.91 (s), 116.19 (s), 108.44 (s), 87.14 (s), 77.36 (s), 77.10 (s), 76.85 (s), 76.41 (s), 63.15 (s), 56.28 (s), 54.81 (s), 46.71 (s), 46.05 (s), 44.66 (s), 43.04 (s), 40.50 (s), 31.55 (s), 29.66 (s), 24.29 (s), 22.96 (d,  $J$  = 5.7 Hz), 17.45 (s), 14.10 (s), -1.44 (s); HRMS (ESI):  $m/z$  calcd for  $C_{30}H_{42}NO_7Si$  [M+H]<sup>+</sup>: 556.2731; found: 556.2733.

**3-(3-((4S,4aR,5S,7R,8S,9aS)-4,8-dimethyl-3-oxo-3,4,4a,5,6,7,8,9-octahydro-5,8-epoxy-7,9a-methanobenzo[7]annulen-4-yl)propanamido)-4,5-dihydroxybenzoic acid (28)**. To a solution of carboxylic acid PTMA (29.0 mg, 0.10 mmol) and PyBOP

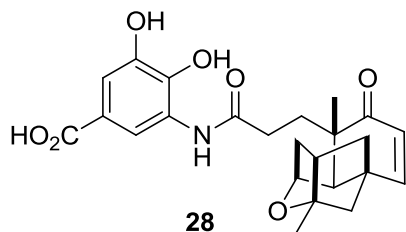

(52.0 mg, 0.10 mmol) in CH<sub>2</sub>Cl<sub>2</sub> (2.0 mL) at room temperature was added Et<sub>3</sub>N (42.1  $\mu$ L, 0.30 mmol). The mixture was stirred for 5 minutes, after which aniline **19** (33.8 mg, 0.20 mmol) in 0.5 mL DMF was added. The mixture was stirred for extra 20 min, after which brine (5.0 mL) was added. The resulting

mixture was extracted with EtOAc (3  $\times$  5.0 mL), and the combined organic portions dried over anhydrous Na<sub>2</sub>SO<sub>4</sub>. Concentration followed by flash column chromatography (eluent: light petroleum ether/EtOAc/AcOH = 2: 3: 0.5) afforded the title compound **28** (33.5 mg, 75%); <sup>1</sup>H NMR (500 MHz, DMSO-*d*<sub>6</sub>)  $\delta$  9.43 (s, 1H), 7.80 (s, 1H), 7.18 (s, 1H), 6.67 (d,  $J$  = 9.9 Hz, 1H), 5.83 (d,  $J$  = 10.0 Hz, 1H), 4.39 (s, 1H), 2.89 (s, 1H), 2.73 (s, 1H), 2.41 (d,  $J$  = 12.5 Hz, 1H), 2.34 (t,  $J$  = 5.8 Hz, 1H),

2.28 (s, 1H), 2.11 (t,  $J = 11.0$  Hz, 2H), 1.98 (d,  $J = 11.3$  Hz, 1H), 1.94 (d,  $J = 11.4$  Hz, 2H), 1.82 – 1.75 (m, 1H), 1.69 (s, 2H), 1.35 (s, 3H), 1.14 (s, 3H);  $^{13}\text{C}$  NMR (126 MHz, DMSO- $d_6$ )  $\delta$  203.33 (s), 172.29 (s), 167.69 (s), 162.79 (s), 154.93 (s), 145.89 (s), 141.47 (s), 126.94 (s), 121.21 (s), 116.13 (s), 112.73 (s), 86.79 (s), 79.63 (s), 76.00 (s), 54.66 (s), 46.45 (s), 46.04 (s), 44.70 (s), 42.80 (s), 40.64 (s), 40.54 (s), 40.37 (s), 36.25 (s), 31.69 (s), 31.60 (s), 31.23 (s), 24.63 (s), 23.39 (s); HRMS (ESI):  $m/z$  calcd for  $\text{C}_{24}\text{H}_{28}\text{NO}_7$   $[\text{M}+\text{H}]^+$ : 442.1866; found: 442.1848.

### Methyl

#### 5-(3-((4S,4aR,5S,7R,8S,9aS)-4,8-dimethyl-3-oxo-3,4,4a,5,6,7,8,9-octahydro-5,8-epoxy-7,9a-methanobenzo[7]annulen-4-yl)propanamido)-2,4-dihydroxybenzoate

(**29a**). To a solution of carboxylic acid PTMA (29.0 mg, 0.10 mmol) and aniline **21a** (36.6 mg, 0.20 mmol) in DMF (1.0 mL) at room temperature were added  $\text{Et}_3\text{N}$  (42.1  $\mu\text{L}$ , 0.30 mmol) and HATU (76.1 mg, 0.20 mmol). The mixture was stirred for 12 h, after which brine (5.0 mL) was added. The resulting mixture was extracted

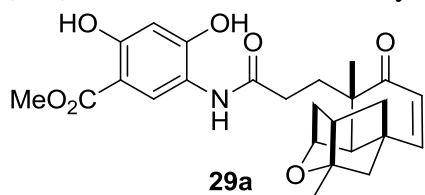

with  $\text{EtOAc}$  ( $3 \times 5.0$  mL), and the combined organic portions dried over anhydrous  $\text{Na}_2\text{SO}_4$ . Concentration followed by flash column chromatography (eluent:  $\text{EtOAc}$ /light petroleum ether = 1:10~ 1:3) afforded the title compound **29a** (28.7 mg, 63%);  $^1\text{H}$  NMR (400 MHz,  $\text{CDCl}_3$ )  $\delta$  10.67 (s, 1H), 8.25 (s, 1H), 7.67 (s, 1H), 6.55 (d,  $J = 10.4$  Hz, 1H), 6.53 (s, 1H), 5.94 (d,  $J = 10.1$  Hz, 1H), 4.48 (s, 1H), 3.90 (s, 3H), 3.22 (s, 1H), 2.47 (t,  $J = 6.4$  Hz, 2H), 2.41 – 2.36 (m, 2H), 2.31 (d,  $J = 3.0$  Hz, 1H), 2.28 (d,  $J = 2.4$  Hz, 1H), 2.12 (dd,  $J = 14.5, 3.5$  Hz, 2H), 2.07 (s, 1H), 2.04 (s, 1H), 1.95 (d,  $J = 4.3$  Hz, 1H), 1.90 (d,  $J = 3.9$  Hz, 1H), 1.87 (d,  $J = 3.4$  Hz, 1H), 1.82 (d,  $J = 4.8$  Hz, 1H), 1.68 (s, 1H), 1.65 (s, 1H), 1.48 (s, 3H), 1.44 (d,  $J = 2.0$  Hz, 1H), 1.28 (s, 3H);  $^{13}\text{C}$  NMR (101 MHz,  $\text{CDCl}_3$ )  $\delta$  204.65 (s), 173.32 (s), 169.89 (s), 161.02 (s), 155.96 (s), 154.55 (s), 127.06 (s), 123.49 (s), 119.18 (s), 106.04 (s), 104.55 (s), 87.36 (s), 77.30 (d,  $J = 11.5$  Hz), 77.04 (s), 76.72 (s), 76.48 (s), 54.84 (s), 52.07 (s), 47.04 (s), 46.09 (d,  $J = 9.9$  Hz), 44.66 (s), 43.06 (s), 40.54 (s), 31.97 (d,  $J = 7.4$  Hz), 31.62 (s), 29.71 (s), 24.25 (s), 22.96 (s), 22.70 (s); HRMS (ESI):  $m/z$  calcd for  $\text{C}_{25}\text{H}_{30}\text{NO}_7$   $[\text{M}+\text{H}]^+$ : 456.2022; found: 456.2016.

### 2-(trimethylsilyl)ethyl

#### 5-(3-((4S,4aR,5S,7R,8S,9aS)-4,8-dimethyl-3-oxo-3,4,4a,5,6,7,8,9-octahydro-5,8-epoxy-7,9a-methanobenzo[7]annulen-4-yl)propanamido)-2,4-dihydroxybenzoate

(**29b**). To a solution of carboxylic acid PTMA (58.0 mg, 0.20 mmol) and aniline **21b** (107.6 mg, 0.40 mmol) in DMF (2.0 mL) at room temperature were added  $\text{Et}_3\text{N}$  (84.0  $\mu\text{L}$ , 0.60 mmol) and HATU (152.2 mg, 0.40 mmol). The mixture was stirred for 12 h, after which brine (5.0 mL) was added. The resulting mixture was extracted with  $\text{EtOAc}$  ( $3 \times 5.0$  mL), and the combined organic portions dried over anhydrous  $\text{Na}_2\text{SO}_4$ . Concentration

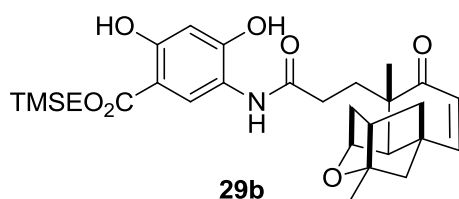

followed by flash column chromatography (eluent: EtOAc/light petroleum ether = 1:10~ 1:3) afforded the title compound **29b** (88.7 mg, 82%); <sup>1</sup>H NMR (500 MHz, CDCl<sub>3</sub>) δ 10.80 (s, 1H), 10.06 (s, 1H), 8.19 (s, 1H), 7.63 (s, 1H), 6.55 (d, *J* = 9.6 Hz, 2H), 5.94 (d, *J* = 10.0 Hz, 1H), 4.47 (s, 1H), 4.44 – 4.37 (m, 2H), 2.47 (d, *J* = 6.4 Hz, 1H), 2.44 (d, *J* = 6.6 Hz, 1H), 2.38 (s, 1H), 2.36 – 2.30 (m, 1H), 2.30 – 2.23 (m, 1H), 1.92 (s, 1H), 1.89 (d, *J* = 10.5 Hz, 1H), 1.82 (dd, *J* = 11.1, 6.7 Hz, 2H), 1.66 (d, *J* = 11.2 Hz, 1H), 1.48 (s, 3H), 1.28 (s, 3H), 1.17 – 1.13 (m, 2H), 0.10 (s, 9H); <sup>13</sup>C NMR (126 MHz, CDCl<sub>3</sub>) δ 204.56 (s), 173.44 (s), 169.65 (s), 161.20 (s), 155.96 (s), 154.50 (s), 127.07 (s), 123.51 (s), 119.08 (s), 106.35 (s), 105.07 (s), 87.24 (s), 77.28 (s), 77.03 (s), 76.77 (s), 76.44 (s), 63.58 (s), 54.87 (s), 47.03 (s), 46.12 (d, *J* = 6.5 Hz), 44.67 (s), 43.08 (s), 40.56 (s), 32.11 (s), 31.81 (s), 31.44 (s), 30.20 (s), 29.70 (s), 24.23 (s), 22.97 (s), 17.52 (s), -1.47 (s); HRMS (ESI): *m/z* calcd for C<sub>29</sub>H<sub>40</sub>NO<sub>7</sub>Si [M+H]<sup>+</sup>: 542.2574; found: 542.2570.

### Methyl

**3-(3-((4*S*,4*a**R*,5*S*,7*R*,8*S*,9*a**S*)-4,8-dimethyl-3-oxo-3,4,4*a*,5,6,7,8,9-octahydro-5,8-epoxy-7,9*a*-methanobenzo[7]annulen-4-yl)propanamido)-2,5-dihydroxybenzoate (30).** To a solution of carboxylic acid PTMA (29.0 mg, 0.10 mmol) and aniline **24**

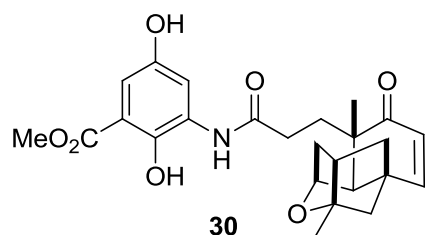

(36.6 mg, 0.20 mmol) in DMF (1.0 mL) at room temperature were added Et<sub>3</sub>N (42.1 μL, 0.30 mmol) and HATU (76.1 mg, 0.20 mmol). The mixture was stirred for 12 h, after which brine (5.0 mL) was added. The resulting mixture was extracted with EtOAc (3 × 5.0 mL), and the combined organic portions dried over anhydrous Na<sub>2</sub>SO<sub>4</sub>.

Concentration followed by flash column chromatography (eluent: EtOAc/light petroleum ether = 1:10~ 1:3) afforded the title compound **30** (26.8 mg, 59%); <sup>1</sup>H NMR (400 MHz, CDCl<sub>3</sub>) δ 10.69 (s, 1H), 8.44 (d, *J* = 2.9 Hz, 1H), 8.09 (s, 1H), 7.04 (d, *J* = 2.9 Hz, 1H), 6.51 (d, *J* = 10.1 Hz, 1H), 5.94 (d, *J* = 10.1 Hz, 1H), 4.62 (s, 1H), 3.95 (s, 3H), 2.45 (t, *J* = 6.6 Hz, 2H), 2.41 – 2.35 (m, 2H), 2.32 (dd, *J* = 12.4, 2.2 Hz, 1H), 2.25 (dd, *J* = 13.8, 2.8 Hz, 1H), 2.16 (d, *J* = 5.0 Hz, 1H), 2.10 (d, *J* = 3.4 Hz, 1H), 2.07 (d, *J* = 1.6 Hz, 2H), 1.93 (d, *J* = 3.5 Hz, 1H), 1.90 (d, *J* = 3.4 Hz, 1H), 1.83 – 1.79 (m, 1H), 1.64 (d, *J* = 11.2 Hz, 1H), 1.48 (s, 3H), 1.44 (d, *J* = 1.7 Hz, 1H), 1.29 (s, 3H); <sup>13</sup>C NMR (101 MHz, CDCl<sub>3</sub>) δ 204.03 (s), 172.26 (s), 170.63 (s), 153.93 (s), 148.91 (s), 143.90 (s), 127.26 (d, *J* = 12.1 Hz), 113.71 (s), 111.62 (s), 108.95 (s), 87.25 (s), 77.29 (d, *J* = 11.5 Hz), 77.03 (s), 76.63 (d, *J* = 17.3 Hz), 54.85 (s), 52.43 (s), 46.80 (s), 46.08 (s), 44.72 (s), 44.46 (s), 43.15 (s), 40.61 (s), 33.18 (s), 31.93 (s), 31.37 (d, *J* = 14.3 Hz), 30.25 (d, *J* = 11.9 Hz), 29.37 (s), 24.27 (s), 22.98 (s), 22.70 (s); HRMS (ESI): *m/z* calcd for C<sub>25</sub>H<sub>30</sub>NO<sub>7</sub> [M+H]<sup>+</sup>: 456.2022; found: 456.2008.

**3-(3-((4S,4aR,5S,7R,8S,9aS)-4,8-dimethyl-3-oxo-3,4,4a,5,6,7,8,9-octahydro-5,8-epoxy-7,9a-methanobenzo[7]annulen-4-yl)propanamido)-2-hydroxy-5-methoxybenzoic acid (25b).** To a stirred solution of TMSE-ester **25a** (55.5 mg, 0.1 mmol) in

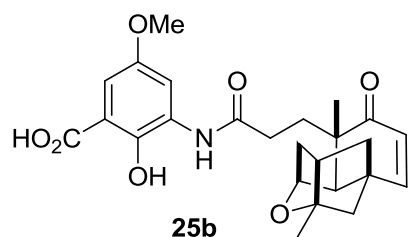

CH<sub>2</sub>Cl<sub>2</sub> (2 mL) was added TBAF (52.2 mg, 0.2 mmol) at room temperature. The resulting reaction mixture was stirred at 40 °C for 12 h. Brine (5 mL) followed by water (5 mL) were added and the biphasic mixture was extracted first with CHCl<sub>3</sub> (3 × 5 mL). The combined organic phases were dried over Na<sub>2</sub>SO<sub>4</sub>, filtered and concentrated *in vacuo*.

The residue so obtained was purified by flash column chromatography (eluent: light petroleum ether/EtOAc/AcOH = 2: 3: 0.5) to give title compound **25b** (34.6 mg, 76%); <sup>1</sup>H NMR (500 MHz, DMSO-*d*<sub>6</sub>) δ 9.28 (s, 1H), 7.88 (s, 1H), 6.98 (s, 1H), 6.66 (d, *J* = 10.0 Hz, 1H), 5.83 (d, *J* = 10.0 Hz, 1H), 4.39 (s, 1H), 3.70 (s, 3H), 2.34 (t, *J* = 6.2 Hz, 1H), 2.28 (s, 1H), 2.11 (dd, *J* = 16.7, 8.0 Hz, 2H), 1.98 (d, *J* = 11.4 Hz, 1H), 1.92 (d, *J* = 7.9 Hz, 2H), 1.79 (d, *J* = 6.8 Hz, 1H), 1.69 (s, 2H), 1.35 (s, 3H), 1.31 – 1.20 (m, 2H), 1.13 (s, 3H); <sup>13</sup>C NMR (126 MHz, DMSO-*d*<sub>6</sub>) δ 203.38 (s), 172.48 (s), 171.87 (s), 154.92 (s), 150.82 (s), 147.40 (s), 128.35 (s), 126.97 (s), 115.12 (s), 113.33 – 112.95 (m), 106.80 (s), 86.77 (s), 76.02 (s), 55.87 (s), 54.66 (s), 46.50 (s), 46.00 – 45.72 (m), 44.69 (s), 42.81 (s), 40.64 (s), 40.53 (s), 40.36 (s), 31.92 (s), 31.44 (s), 24.67 (s), 23.41 (s), 21.53 (s); HRMS (ESI): *m/z* calcd for C<sub>25</sub>H<sub>30</sub>NO<sub>7</sub> [M+H]<sup>+</sup>: 456.2022; found: 456.2013.

**3-(3-((4S,4aR,5S,7R,8S,9aS)-4,8-dimethyl-3-oxo-3,4,4a,5,6,7,8,9-octahydro-5,8-epoxy-7,9a-methanobenzo[7]annulen-4-yl)propanamido)-4-hydroxy-5-methoxybenzoic acid (27c).** To a stirred solution of TMSE-ester **27b** (54.1 mg, 0.1 mmol) in

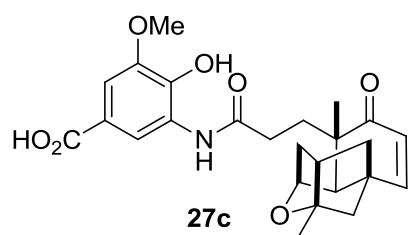

CH<sub>2</sub>Cl<sub>2</sub> (2 mL) was added TBAF (52.2 mg, 0.2 mmol) at room temperature. The resulting reaction mixture was stirred at 40 °C for 12 h. Brine (5 mL) followed by water (5 mL) were added and the biphasic mixture was extracted first with CHCl<sub>3</sub> (3 × 5 mL). The combined organic phases were dried

over Na<sub>2</sub>SO<sub>4</sub>, filtered and concentrated *in vacuo*. The residue so obtained was purified by flash column chromatography (eluent: light petroleum ether/EtOAc/AcOH = 2: 3: 0.5) to give title compound **27c** (34.6 mg, 76%); <sup>1</sup>H NMR (500 MHz, MeOD) δ 8.19 (d, *J* = 1.8 Hz, 1H), 7.43 (d, *J* = 1.7 Hz, 1H), 6.66 (d, *J* = 10.1 Hz, 1H), 5.91 (d, *J* = 10.1 Hz, 1H), 4.52 (s, 1H), 3.92 (s, 3H), 2.46 (s, 1H), 2.45 (s, 2H), 2.30 (td, *J* = 14.1, 4.5 Hz, 2H), 2.12 – 2.06 (m, 3H), 1.91 – 1.84 (m, 2H), 1.84 – 1.79 (m, 1H), 1.75 (d, *J* = 11.1 Hz, 1H), 1.45 (s, 3H), 1.27 (s, 3H); <sup>13</sup>C NMR (126 MHz, MeOD) δ 204.31 (s), 172.99 (s), 168.41 (s), 154.62 (s), 147.45 (s), 142.22 (s), 126.47 (s), 125.37 (s), 120.69 (s), 117.77 (s), 108.59 (s), 87.36 (s), 76.63 (s), 55.25 (s), 54.41 (s), 46.42 (s), 45.89 (s), 45.86 (s), 44.69 (s), 42.49 (s), 40.09 (s), 31.43 (s), 31.22 (s), 23.73 (s), 21.80 (s); HRMS (ESI): *m/z* calcd for C<sub>25</sub>H<sub>30</sub>NO<sub>7</sub> [M+H]<sup>+</sup>: 456.2022; found: 456.2015.

**5-(3-((4S,4aR,5S,7R,8S,9aS)-4,8-dimethyl-3-oxo-3,4,4a,5,6,7,8,9-octahydro-5,8-epoxy-7,9a-methanobenzo[7]annulen-4-yl)propanamido)-2,4-dihydroxybenzoic acid (29c).** To a stirred solution of TMSE-ester **29b** (54.1 mg, 0.1 mmol) in CH<sub>2</sub>Cl<sub>2</sub> (2

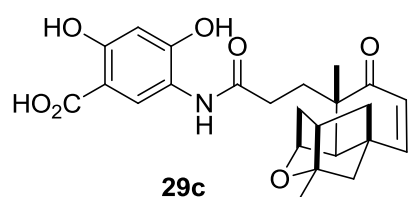

mL) was added TBAF (52.2 mg, 0.2 mmol) at room temperature. The resulting reaction mixture was stirred at 40 °C for 12 h. Brine (5 mL) followed by water (5 mL) were added and the biphasic mixture was extracted first with CHCl<sub>3</sub> (3 × 5 mL). The combined organic phases were dried over Na<sub>2</sub>SO<sub>4</sub>,

filtered and concentrated *in vacuo*. The residue so obtained was purified by flash column chromatography (eluent: light petroleum ether/EtOAc/AcOH = 2: 3: 0.5) to give title compound **29c** (37.5 mg, 85%); <sup>1</sup>H NMR (400 MHz, MeOD) δ 7.98 (s, 1H), 6.66 (d, *J* = 10.1 Hz, 1H), 6.31 (s, 1H), 5.91 (d, *J* = 10.1 Hz, 1H), 4.51 (s, 1H), 2.46 (d, *J* = 5.8 Hz, 1H), 2.43 (s, 1H), 2.30 (dd, *J* = 14.6, 3.2 Hz, 1H), 2.27 – 2.19 (m, 1H), 2.12 (d, *J* = 11.3 Hz, 2H), 2.07 (d, *J* = 3.4 Hz, 1H), 1.96 (s, 1H), 1.88 (d, *J* = 5.3 Hz, 1H), 1.85 (d, *J* = 5.7 Hz, 1H), 1.81 (d, *J* = 3.2 Hz, 1H), 1.75 (d, *J* = 10.9 Hz, 1H), 1.45 (s, 3H), 1.27 (d, *J* = 9.6 Hz, 3H); <sup>13</sup>C NMR (101 MHz, MeOD) δ 204.38 (s), 173.18 (s), 160.40 (s), 154.59 (d, *J* = 21.2 Hz), 154.48 (s), 130.97 (s), 128.47 (s), 126.47 (s), 126.37 (s), 116.89 (s), 109.55 (s), 102.36 (s), 87.37 (s), 76.61 (s), 54.40 (s), 48.24 (s), 48.03 (s), 47.82 (s), 47.61 (s), 47.39 (s), 47.18 (s), 46.97 (s), 46.42 (s), 45.87 (d, *J* = 3.5 Hz), 44.69 (s), 42.49 (s), 40.09 (s), 31.41 (s), 31.14 (s), 23.74 (s), 21.81 (s); HRMS (ESI): *m/z* calcd for C<sub>24</sub>H<sub>28</sub>NO<sub>7</sub> [M+H]<sup>+</sup>: 442.1866; found: 442.1856.

**5-chloro-3-(3-((4S,4aR,5S,7R,8S,9aS)-4,8-dimethyl-3-oxo-3,4,4a,5,6,7,8,9-octahydro-5,8-epoxy-7,9a-methanobenzo[7]annulen-4-yl)propanamido)-2,4-dihydroxybenzoic acid (s-4f).** <sup>1</sup>H NMR (400 MHz, MeOD) δ 7.77 (s, 1H), 6.67 (d, *J* = 10.1 Hz,

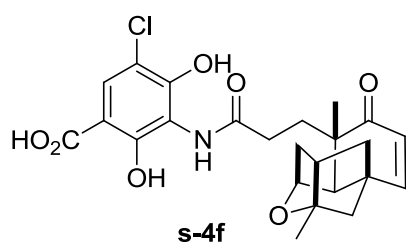

1H), 5.92 (d, *J* = 10.1 Hz, 1H), 4.53 (s, 1H), 2.56 – 2.49 (m, 1H), 2.46 (t, *J* = 5.8 Hz, 2H), 2.41 – 2.36 (m, 1H), 2.34 (d, *J* = 3.1 Hz, 1H), 2.11 (d, *J* = 4.6 Hz, 2H), 2.08 (d, *J* = 3.5 Hz, 1H), 2.02 (d, *J* = 8.7 Hz, 1H), 1.90 (d, *J* = 5.9 Hz, 1H), 1.88 – 1.84 (m, 1H), 1.83 (d, *J* = 3.2 Hz, 1H), 1.76 (d, *J* = 11.2 Hz, 1H), 1.45 (d, *J* = 3.6 Hz, 3H), 1.28 (d, *J* = 3.2 Hz,

3H); <sup>13</sup>C NMR (126 MHz, MeOD) δ 204.39 (s), 175.32 – 174.41 (m), 168.50 – 166.97 (m), 154.70 (s), 132.87 – 131.62 (m), 130.95 (s), 128.47 (s), 126.47 (s), 87.38 (s), 76.61 (s), 65.25 (s), 54.41 (s), 47.89 – 47.88 (m), 46.43 (s), 45.91 (s), 44.70 (s), 42.50 (s), 40.09 (s), 31.24 (s), 30.70 (s), 30.32 (s), 29.39 (s), 23.72 (s), 21.81 (s); HRMS (ESI): *m/z* calcd for C<sub>24</sub>H<sub>27</sub>ClNO<sub>7</sub> [M+H]<sup>+</sup>: 476.1476; found: 476.1471.



**5-bromo-3-(3-((4S,4aR,5S,7R,8S,9aS)-4,8-dimethyl-3-oxo-3,4,4a,5,6,7,8,9-octahydro-5,8-epoxy-7,9a-methanobenzo[7]annulen-4-yl)propanamido)-2,4-dihydroxybenzoic acid (s-4h).**

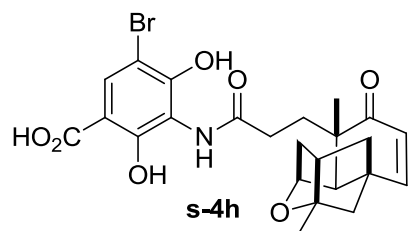

$^1\text{H NMR}$  (400 MHz, MeOD)  $\delta$  7.94 (s, 1H), 6.67 (d,  $J = 10.1$  Hz, 1H), 5.92 (d,  $J = 10.1$  Hz, 1H), 4.53 (s, 1H), 2.53 (dd,  $J = 11.6, 5.5$  Hz, 1H), 2.45 (d,  $J = 6.5$  Hz, 2H), 2.42 – 2.35 (m, 1H), 2.33 (dd,  $J = 9.2, 4.5$  Hz, 1H), 2.09 (dd,  $J = 12.6, 4.2$  Hz, 3H), 2.03 (t,  $J = 5.9$  Hz, 1H), 1.88 (dd,  $J = 12.6, 5.8$  Hz, 2H), 1.83 (d,  $J = 3.0$  Hz, 1H), 1.76 (d,  $J = 11.2$  Hz, 1H), 1.45 (s, 3H), 1.28 (s, 3H).  $^{13}\text{C NMR}$  (101 MHz, MeOD)  $\delta$  204.41 (s), 174.86 (s), 156.29 (s), 154.72 (s), 131.55 (s), 126.47 (s), 113.84 (s), 100.48 (s), 87.39 (s), 76.62 (s), 62.86 (s), 54.43 (s), 48.47 (s), 46.43 (s), 45.93 (d,  $J = 3.2$  Hz), 44.71 (s), 42.52 (s), 40.09 (s), 31.16 (s), 30.66 (s), 29.34 (s), 23.71 (s), 21.79 (s), 13.07 (s); HRMS (ESI):  $m/z$  calcd for  $\text{C}_{24}\text{H}_{27}\text{BrNO}_7$   $[\text{M}+\text{H}]^+$ : 520.0971; found: 520.0966.

## References

- [1] I. Wiegand, K. Hilpert, R. E. Hancock, *Nat. Protoc.* **2008**, 3, 163-175.
- [2] J. Wang, S. M. Soisson, K. Young, W. Shoop, S. Kodali, A. Galgoci, R. Painter, G. Parthasarathy, Y. S. Tang, R. Cummings, S. Ha, K. Dorso, M. Motyl, H. Jayasuriya, J. Ondeyka, K. Herath, C. Zhang, L. Hernandez, J. Allocco, A. n. Basilio, J. R. Tormo, O. Genilloud, F. Vicente, F. Pelaez, L. Colwell, S. H. Lee, B. Michael, T. Felcetto, C. Gill, L. L. Silver, J. D. Hemes, K. Bartizal, J. Barrett, D. Schmatz, J. W. Becker, D. Cully, S. B. Singh, *Nature* **2006**, 441, 358-361.
- [3] K. B. Herath, C. Zhang, H. Jayasuriya, J. G. Ondeyka, D. L. Zink, B. Burgess, J. Wang, S. B. Singh, *Org. Lett.* **2008**, 10, 1769-1702.
- [4] C. Zhang, J. Ondeyka, D. L. Zink, B. Burgess, J. Wang, S. B. Singh, *Chem Commun.* **2008**, 40, 5034-5036.
- [5] C. Zhang, J. Ondeyka, Z. Guan, L. Dietrich, B. Burgess, J. Wang, S. B. Singh, *J. Antibiot.* **2009**, 62, 699-702.
- [6] C. Zhang, J. Ondeyka, K. Herath, H. Jayasuriya, Z. Guan, D. L. Zink, L. Dietrich, B. Burgess, S. N. Ha, J. Wang, S. B. Singh, *J. Nat. Prod.* **2011**, 74, 329-340.
- [7] H. Jayasuriya, K. B. Herath, J. G. Ondeyka, D. L. Zink, B. Burgess, J. Wang, S. B. Singh, *Tetrahedron Lett.* **2008**, 49, 3648-3651.
- [8] K. C. Nicolaou, A. F. Stepan, T. Lister, A. Li, A. Montero, G. S. Tria, C. I. Turner, Y. Tang, J. Wang, R. M. Denton, D. J. Edmonds, *J. Am. Chem. Soc.* **2008**, 130, 39, 13110-13119.
- [9] L. Qiu, K. Tian, J. Pan, L. Jiang, H. Yang, X. Zhu, B. Shen, Y. Duan, Y. Huang, *Tetrahedron* **2017**, 73, 771-775.

- [10] S. B. Singh, K. B. Herath, J. Wang, N. Tsou, R. G. Ball, *Tetrahedron Lett.* **2007**, *48*, 5429-5433.
- [11] L.-B. Dong, J. D. Rudolf, B. Shen, *Org. Lett.* **2016**, *18*, 4606-4609.
- [12] L.-B. Dong, J. D. Rudolf, B. Shen, *Bioorg. Med. Chem.* **2016**, *24*, 6348-6353.
- [13] a) Y. Gong, D. C. Hoerr, L. E. Weaner, R. Lin, *J. Label Compd. Radiopharm.* **2008**, *51*, 268-272; b) M. M. Lee, B. R. Peterson, *ACS Omega* **2016**, *1*, 1266-1276; c) P. Lignier, J. Estager, N. Kardos, L. Gravouil, J. Gazza, E. Naffrechoux, M. Draye, *Ultrason. Sonochem.* **2011**, *18*, 28-31; d) G. Vaidyanathan, D. McDougald, J. Choi, M. Pruszynski, E. Koumaianou, Z. Zhou, M. R. Zalutsky, *Org. Biomol. Chem.* **2016**, *14*, 1261-1271; e) K. Tiefenbacher, A. Gollner, J. Mulzer, *Chem.-Eur. J.* **2010**, *16*, 9616-9622.
- [14] a) Y. Yan, B. Qin, C. Ren, X. Chen, Y. K. Yip, R. Ye, D. Zhang, H. Su, H. Zeng, *J. Am. Chem. Soc.* **2010**, *132*, 5869-5879; b) K. C. Nicolaou, A. F. Stepan, T. Lister, A. Li, A. Montero, G. S. Tria, C. I. Turner, Y. Tang, J. Wang, R. M. Denton, D. J. Edmonds, *J. Am. Chem. Soc.* **2008**, *130*, 13110-13119.
- [15] V. N. Sonar, M. Venkatraj, S. Parkin, P. A. Crooks, *Acta Crystallogr., Sect. E: Struct. Rep. Online* **2007**, *63*, o3227-o3227.
- [16] a) L. Wang, J. Gong, L. Deng, Z. Xiang, Z. Chen, Y. Wang, J. Chen, Z. Yang, *Org. Lett.* **2009**, *11*, 1809-1812; b) L. E. Kiss, H. S. Ferreira, L. Torrao, M. J. Bonifacio, P. N. Palma, P. Soares-da-Silva, D. A. Leamonth, *J. Med. Chem.* **2010**, *53*, 3396-3411.
- [17] a) A. K. Ghosh, K. Xi, *J. Org. Chem.* **2009**, *74*, 1163-1170; b) P. Heretsch, A. Giannis, *Synthesis* **2007**, *2007*, 2614-2616; c) K. C. Nicolaou, S. Natarajan, H. Li, N. F. Jain, R. Hughes, M. E. Solomon, J. M. Ramanjulu, C. N. C. Boddy, M. Takayanagi, *Angew. Chem. Int. Ed.* **1998**, *37*, 2708-2714.

## NMR spectra Data of Products.

**Figure S4.**  $^1\text{H}$  NMR (400 MHz) and  $^{13}\text{C}$  NMR (101 MHz) spectrum of **7a** in  $\text{CDCl}_3$

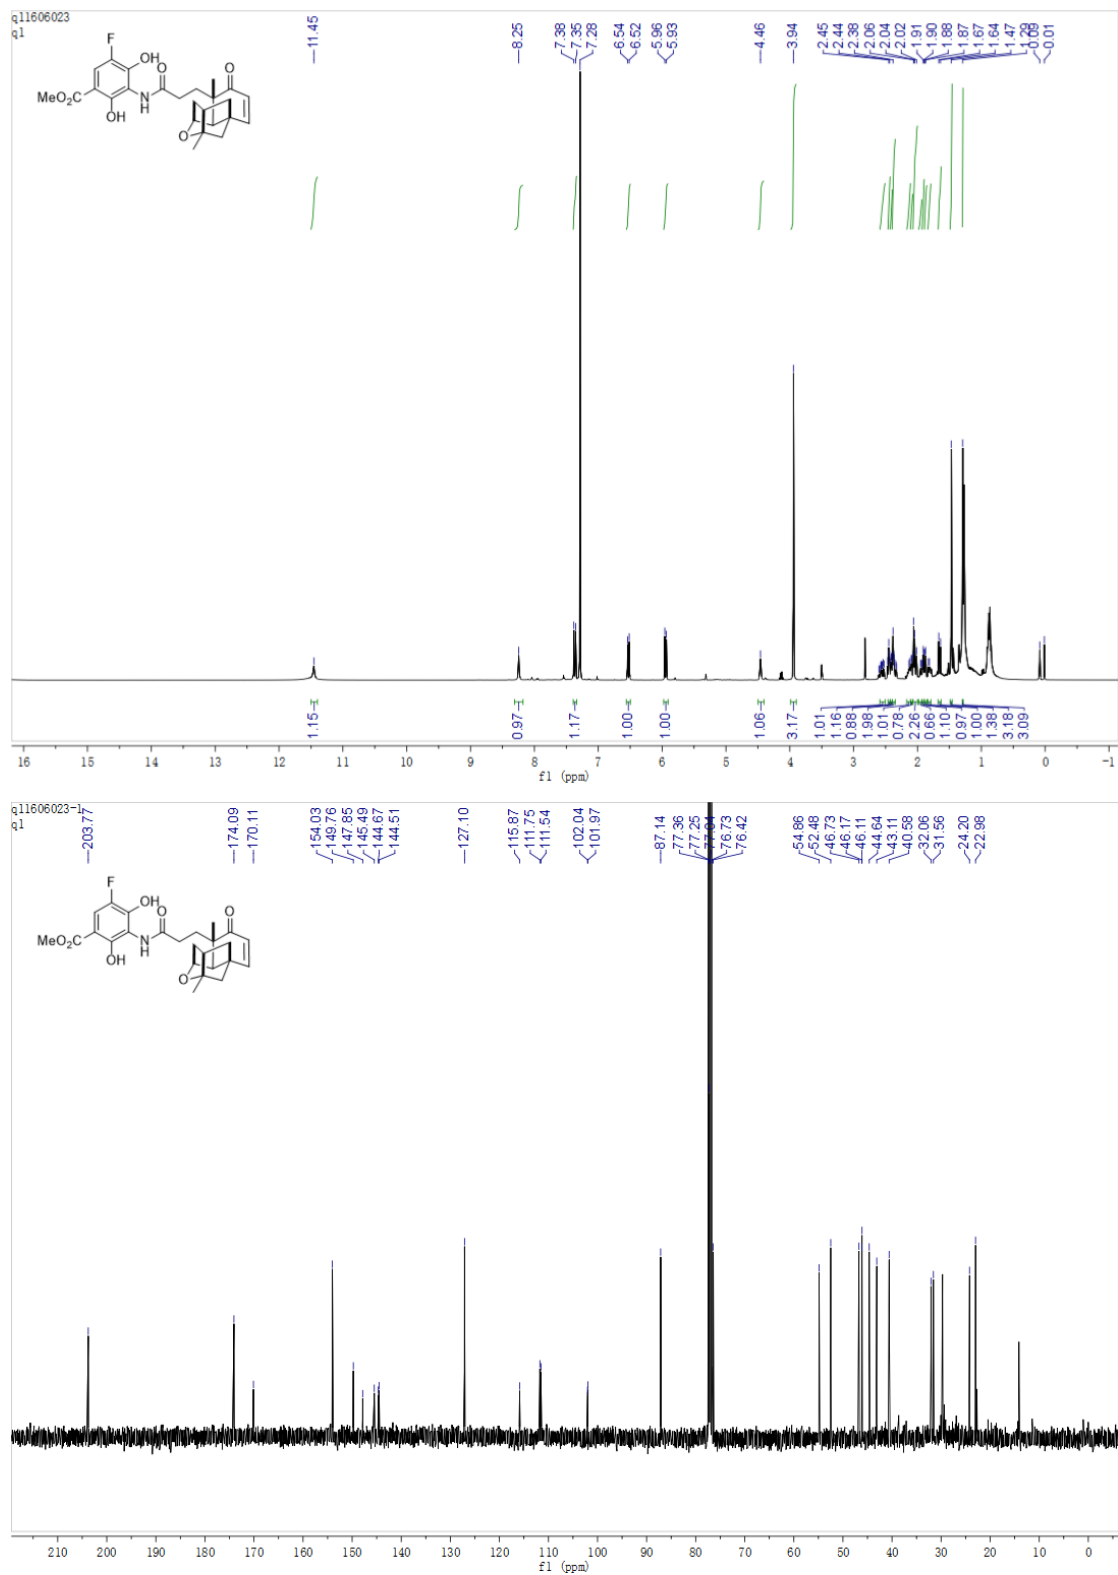

**Figure S5.**  $^1\text{H}$  NMR (500 MHz) and  $^{13}\text{C}$  NMR (126 MHz) spectrum of **7b** in  $\text{DMSO-}d_6$

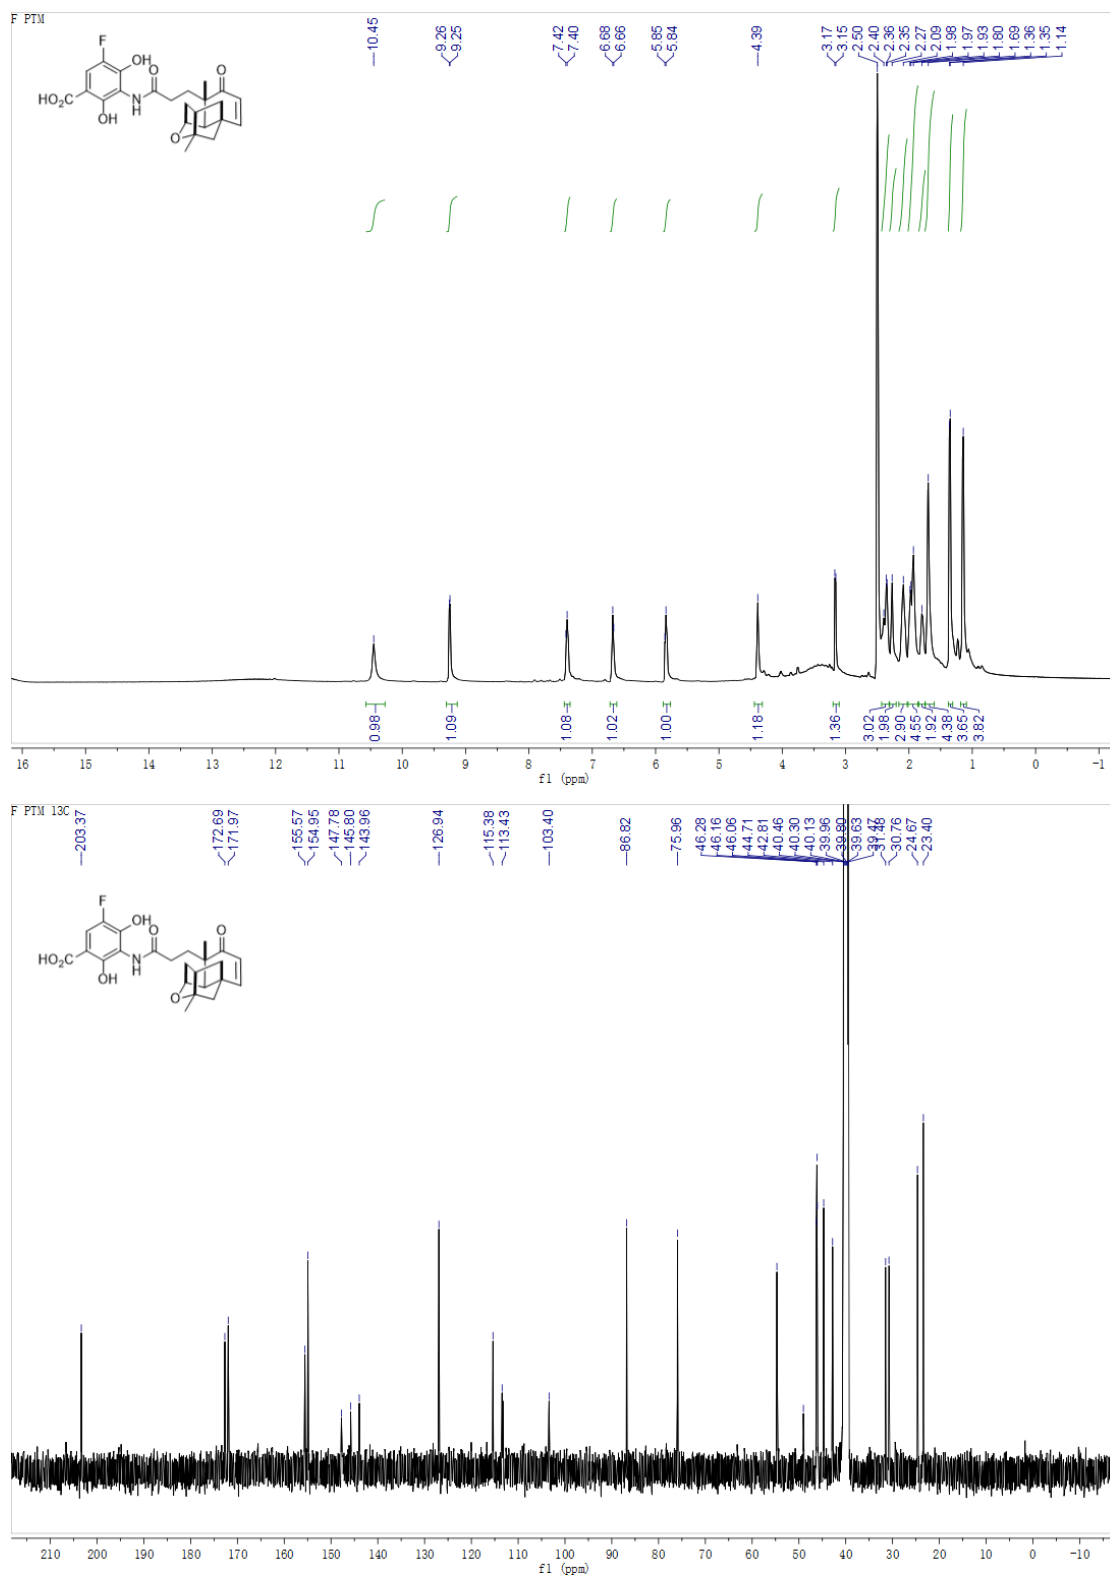

**Figure S6.**  $^1\text{H}$ - $^{13}\text{C}$  HSQC spectrum of **7b** in  $\text{DMSO-}d_6$

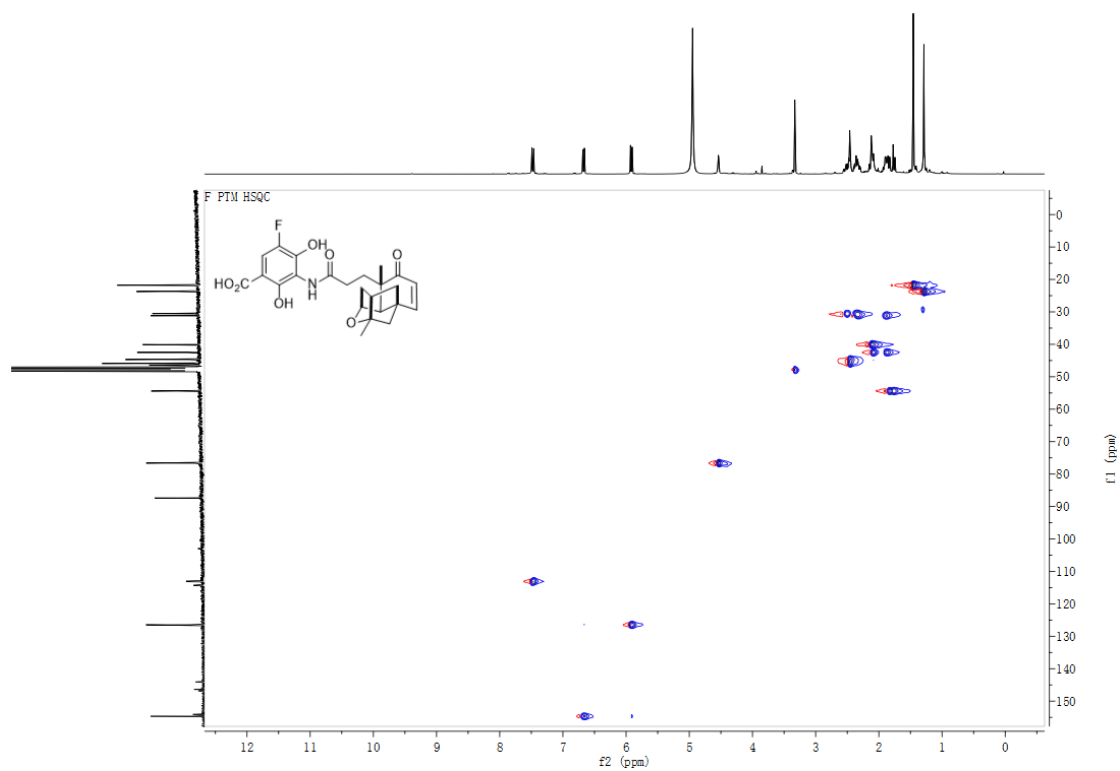

**Figure S7.**  $^1\text{H}$  NMR (500 MHz) and  $^{13}\text{C}$  NMR (126 MHz) spectrum of **8** in  $\text{DMSO-}d_6$

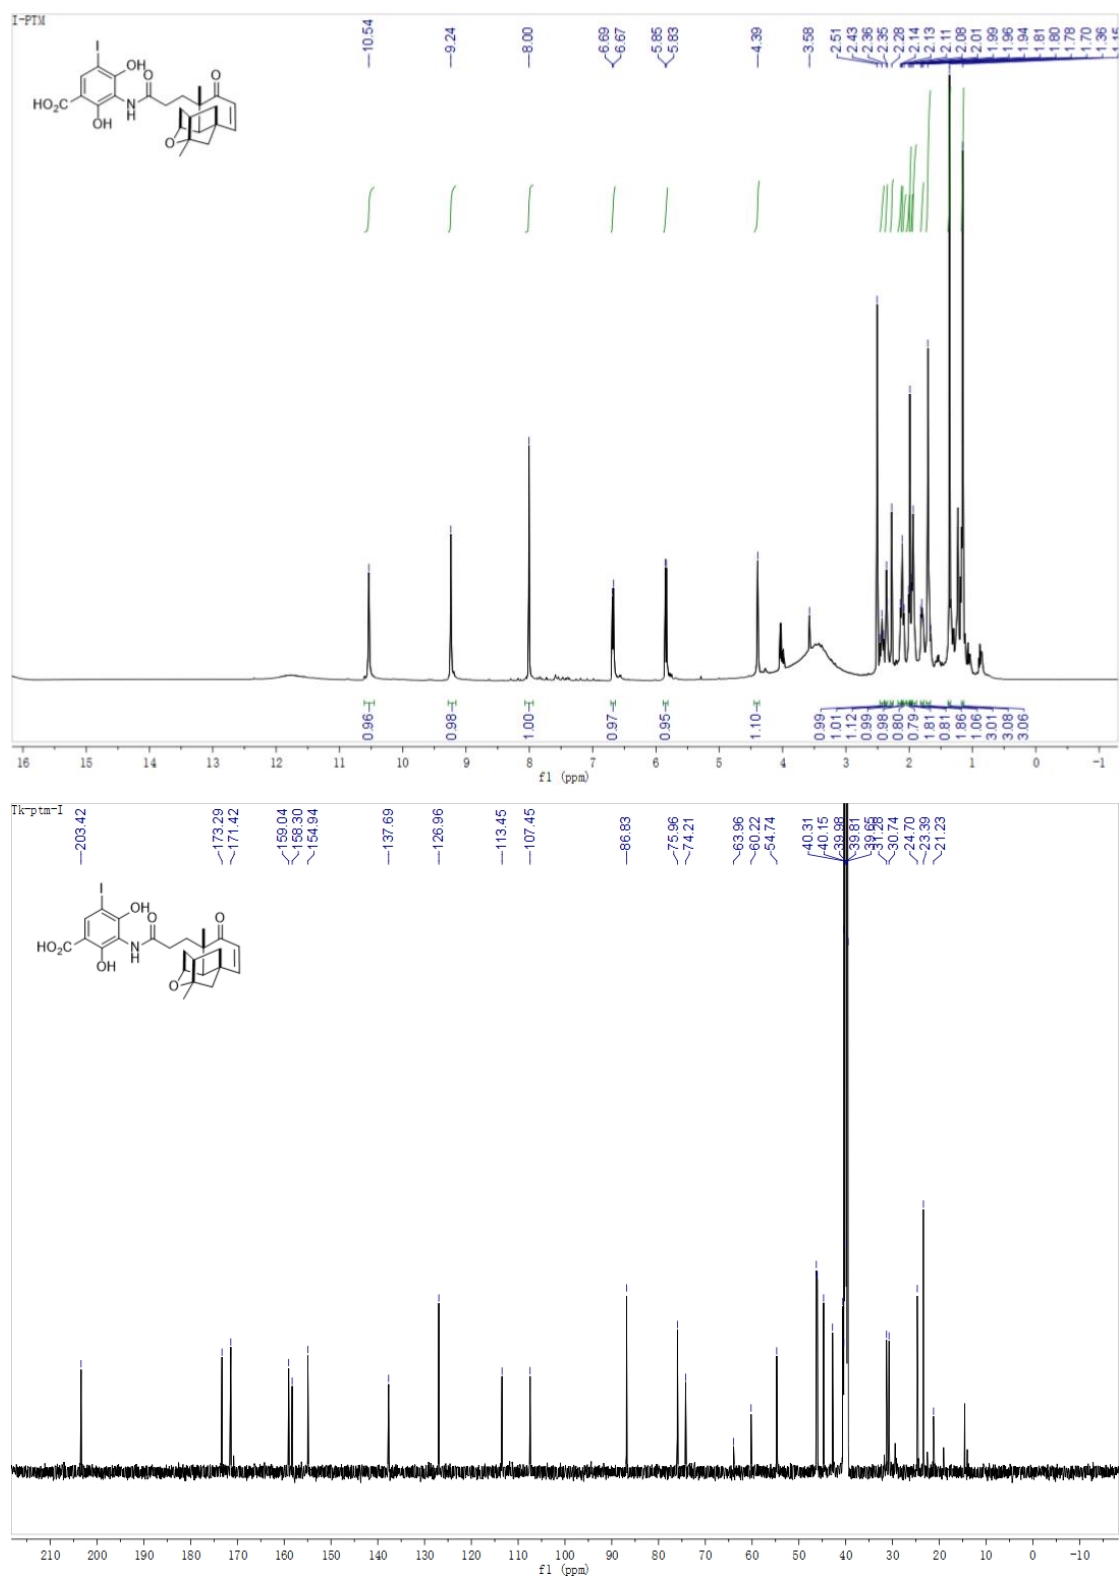

**Figure S8.**  $^1\text{H}$ - $^{13}\text{C}$  HSQC spectrum of **8** in  $\text{DMSO-}d_6$

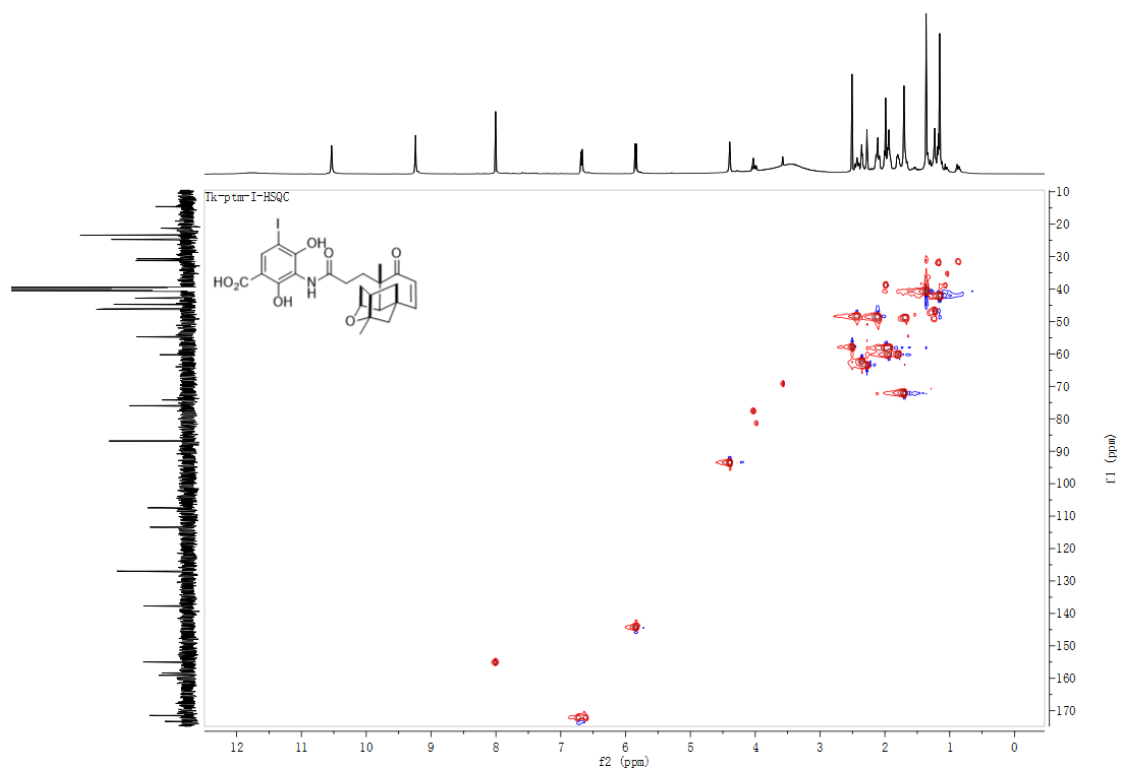

**Figure S9.**  $^1\text{H}$  NMR (500 MHz) and  $^{13}\text{C}$  NMR (126 MHz) spectrum of **9** in MeOD

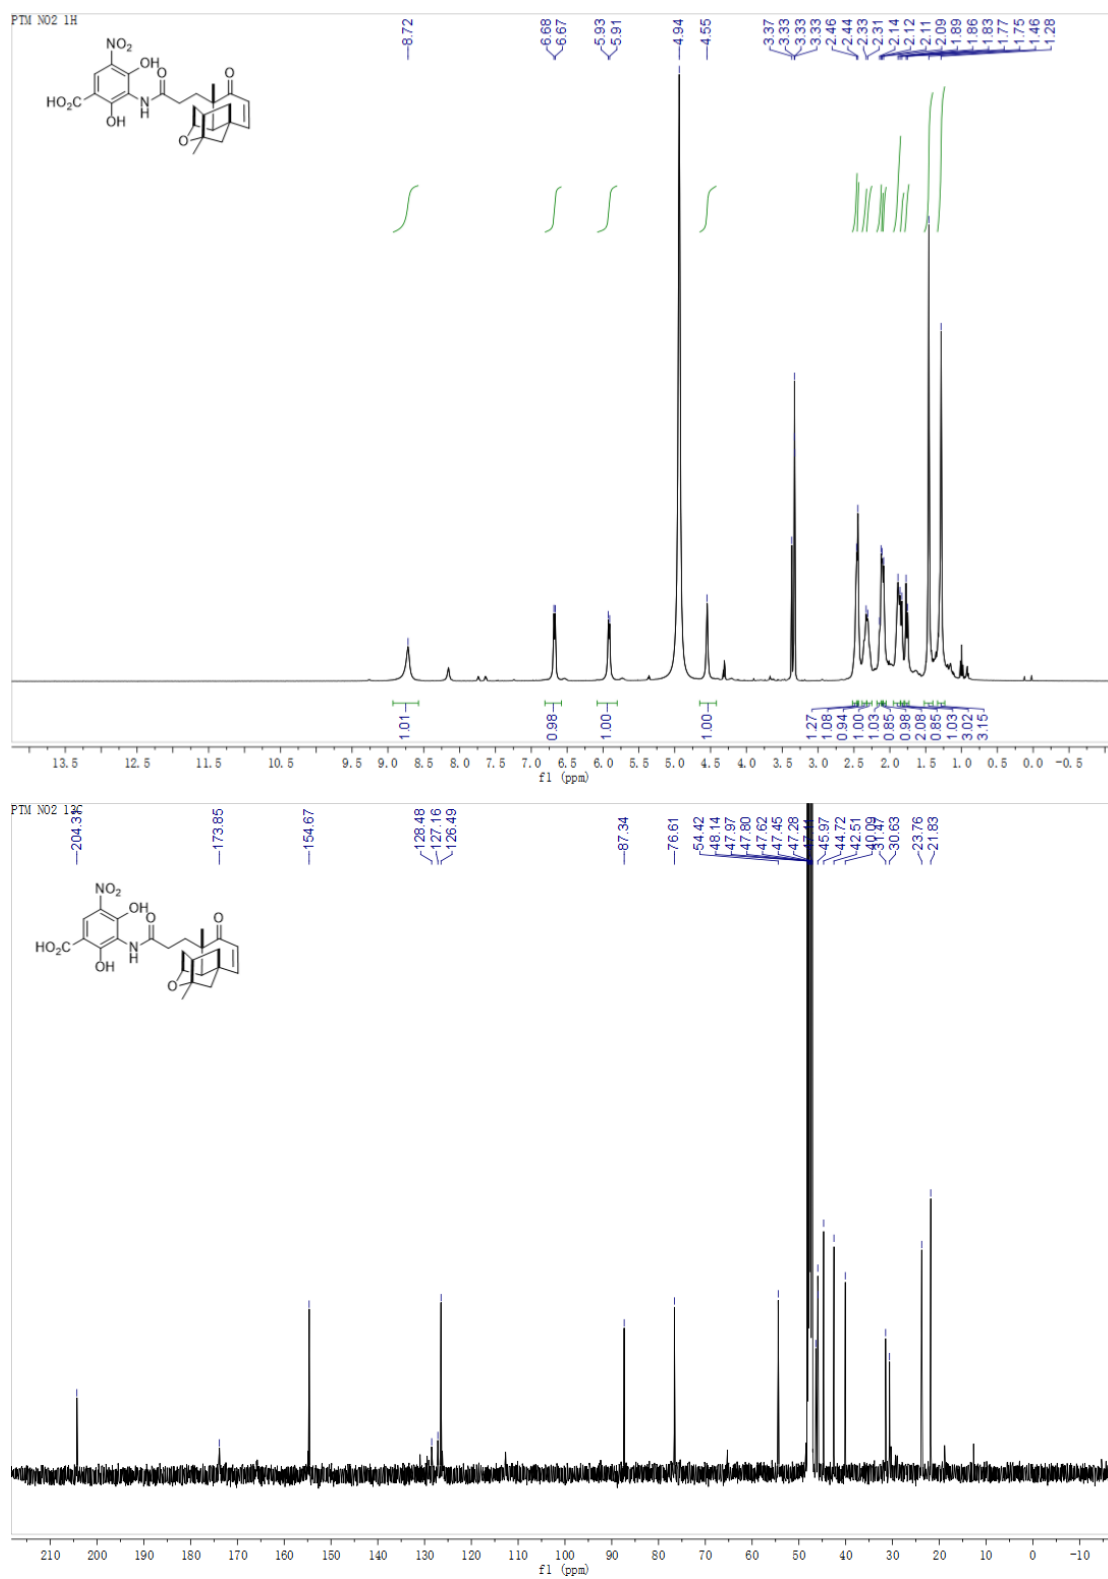



**Figure S10.**  $^1\text{H}$  NMR (400 MHz) and  $^{13}\text{C}$  NMR (126 MHz) spectrum of **10a** in  $\text{DMSO-}d_6$

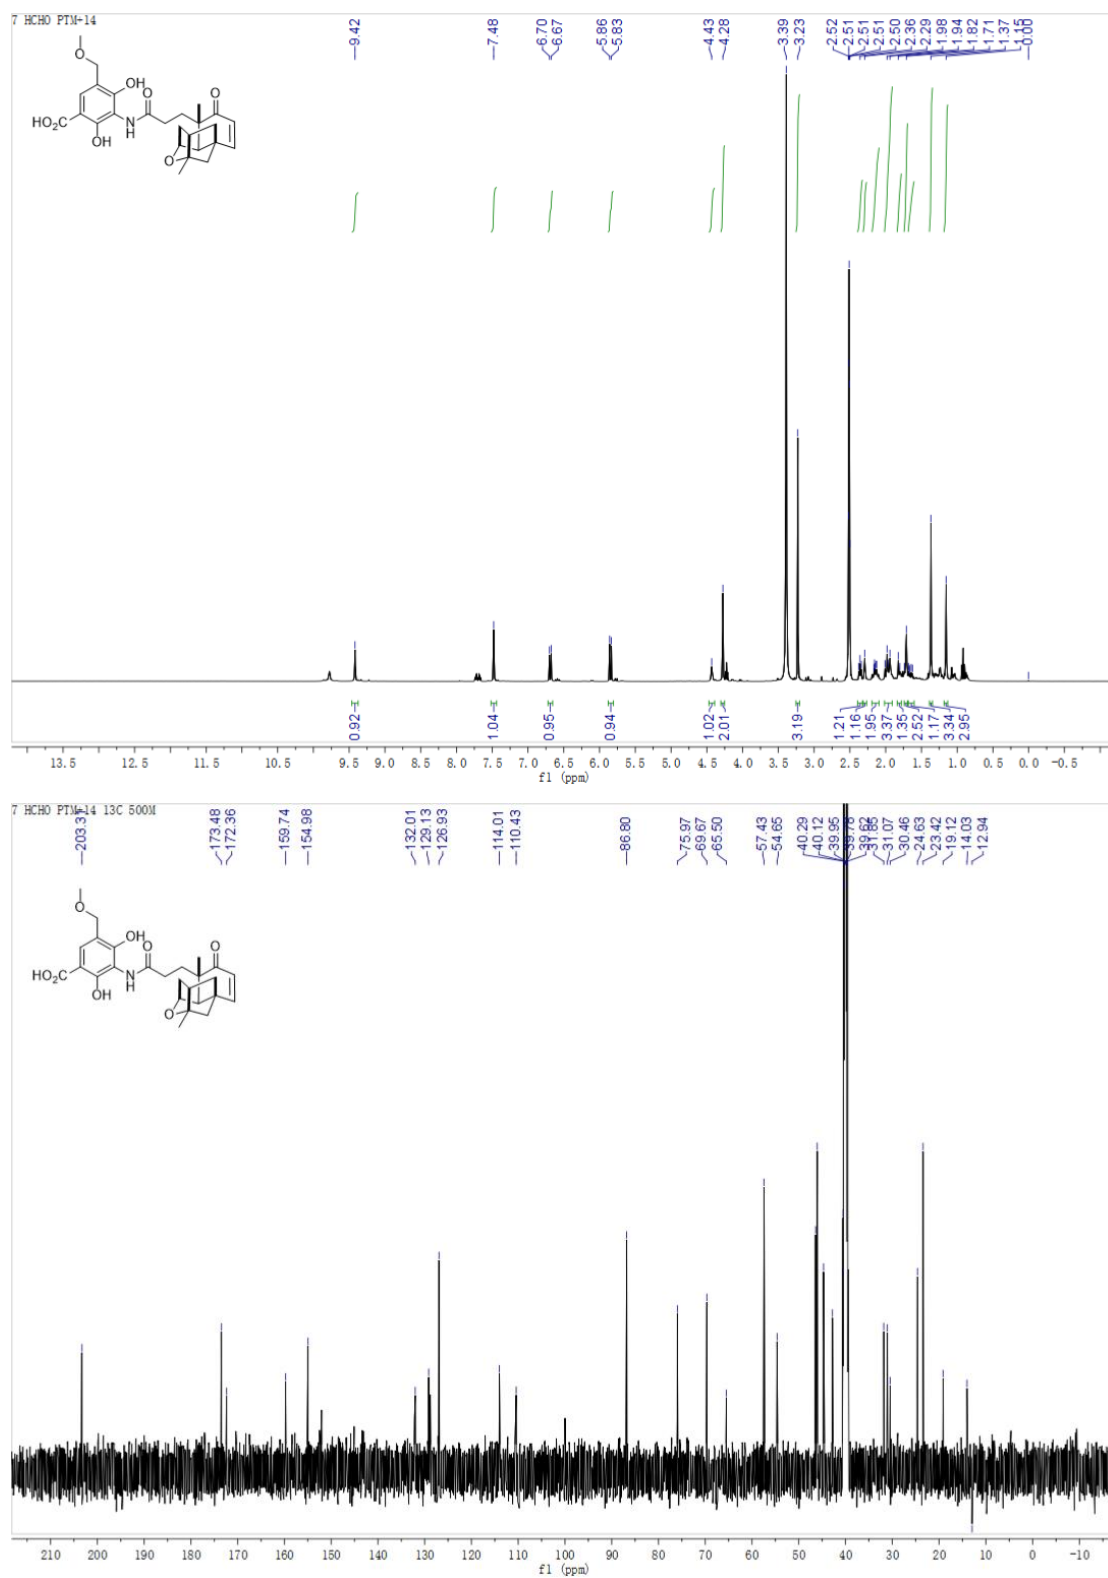

**Figure S11.**  $^1\text{H}$ - $^{13}\text{C}$  HSQC spectrum of **10a** in  $\text{DMSO-}d_6$

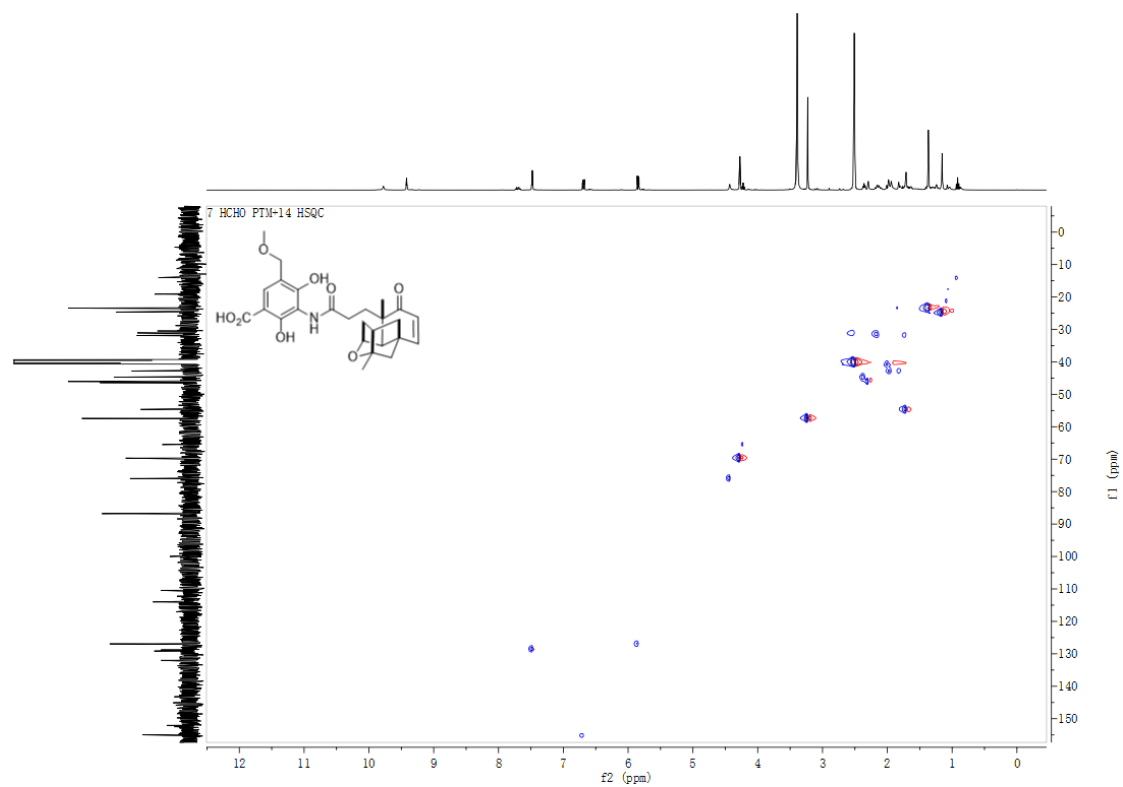

**Figure S12.**  $^1\text{H}$  NMR (400 MHz) and  $^{13}\text{C}$  NMR (101 MHz) spectrum of **10b** in  $\text{DMSO-}d_6$

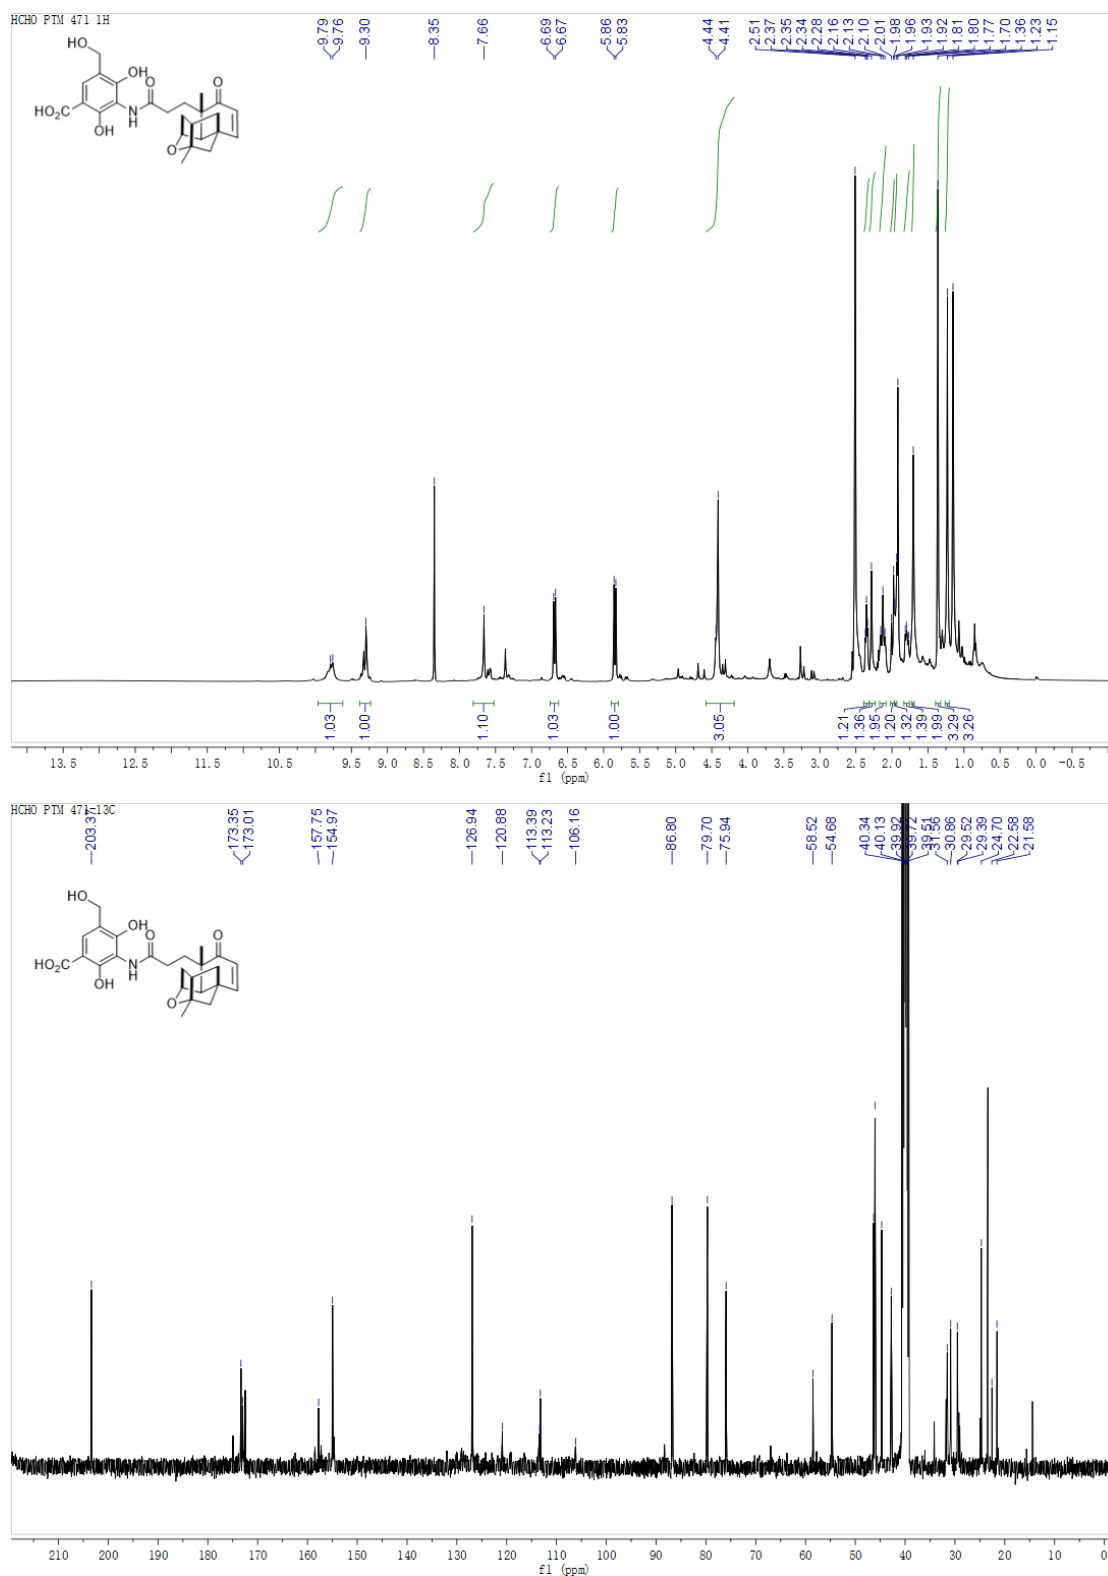

**Figure S13.**  $^1\text{H}$ - $^{13}\text{C}$  HSQC spectrum of **10b** in  $\text{DMSO-}d_6$

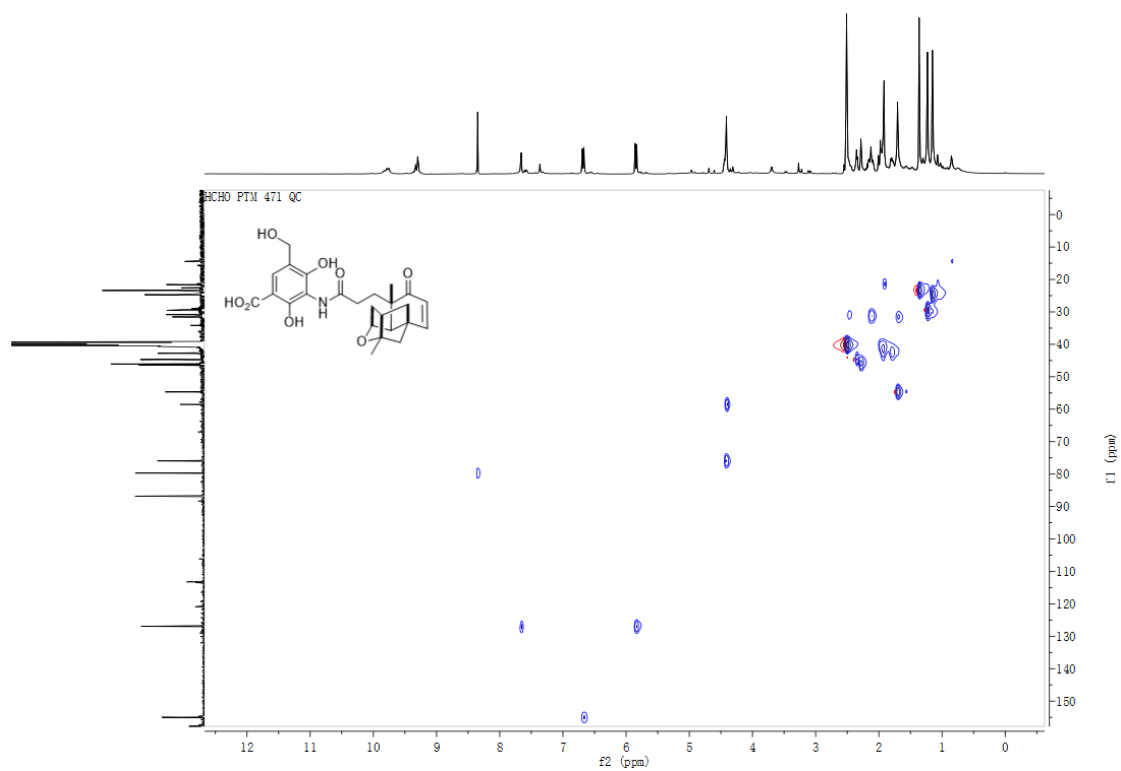

**Figure S14.**  $^1\text{H}$  NMR (400 MHz) and  $^{13}\text{C}$  NMR (101 MHz) spectrum of **25a** in  $\text{CDCl}_3$

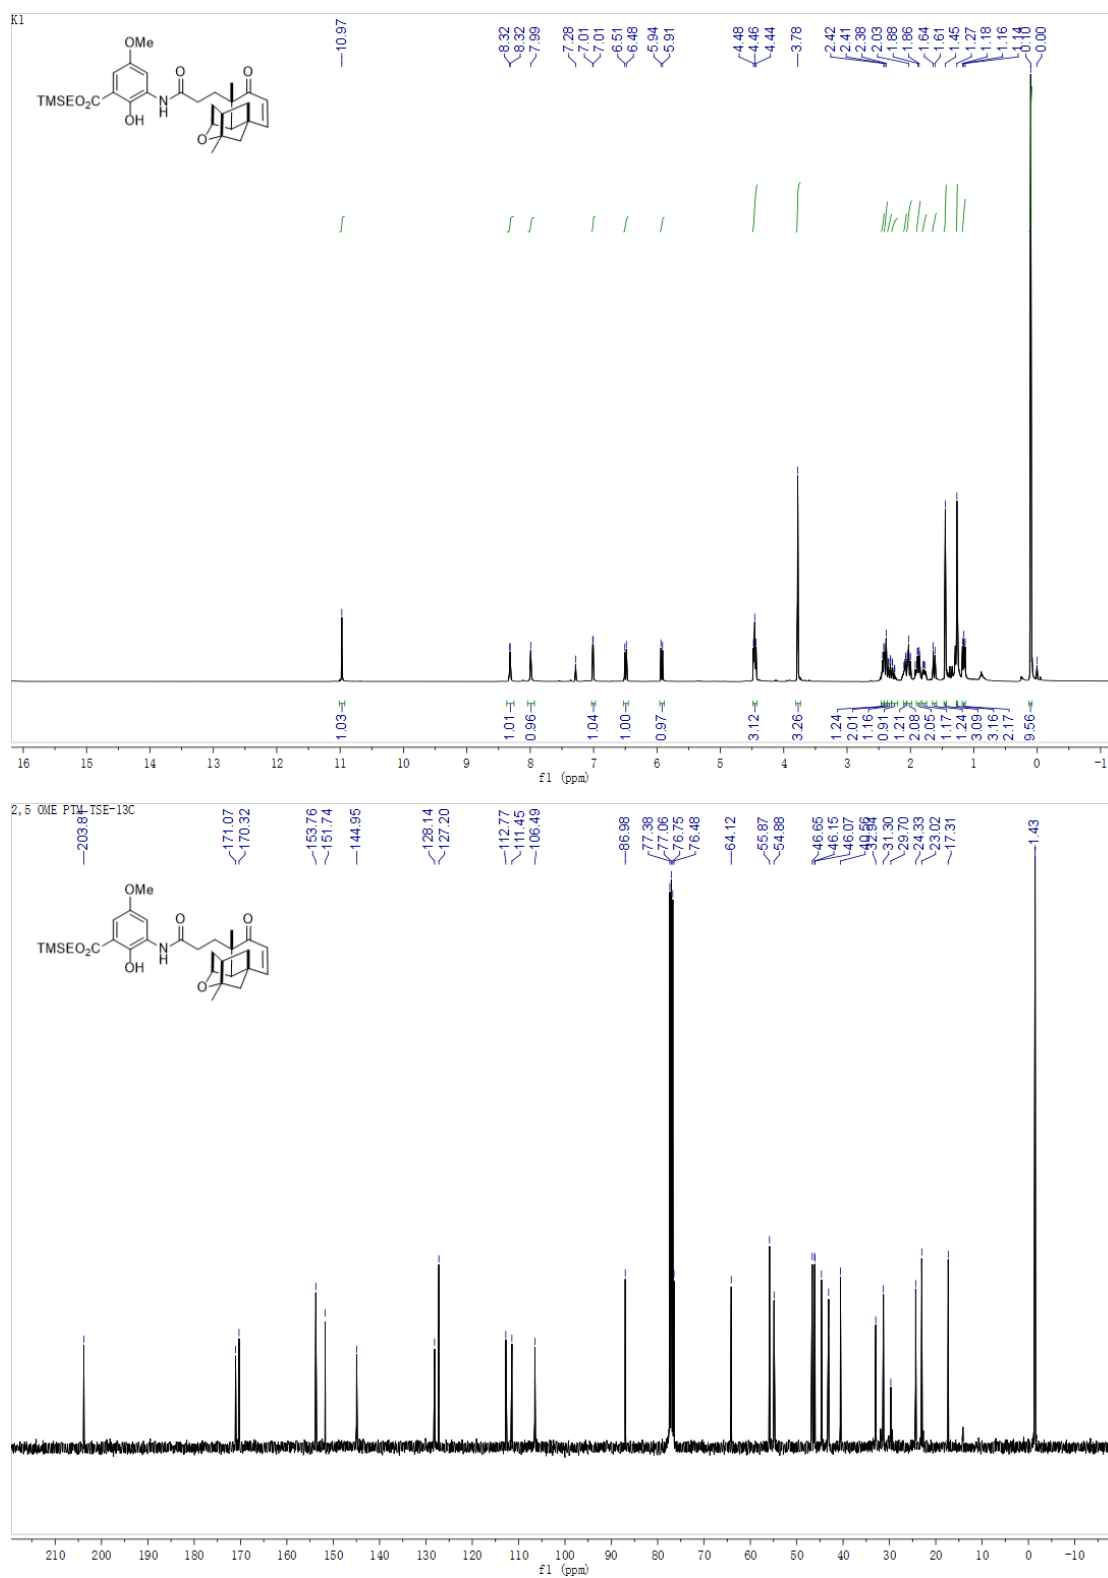

**Figure S15.**  $^1\text{H}$  NMR (400 MHz) and  $^{13}\text{C}$  NMR (101 MHz) spectrum of **26a** in  $\text{CDCl}_3$

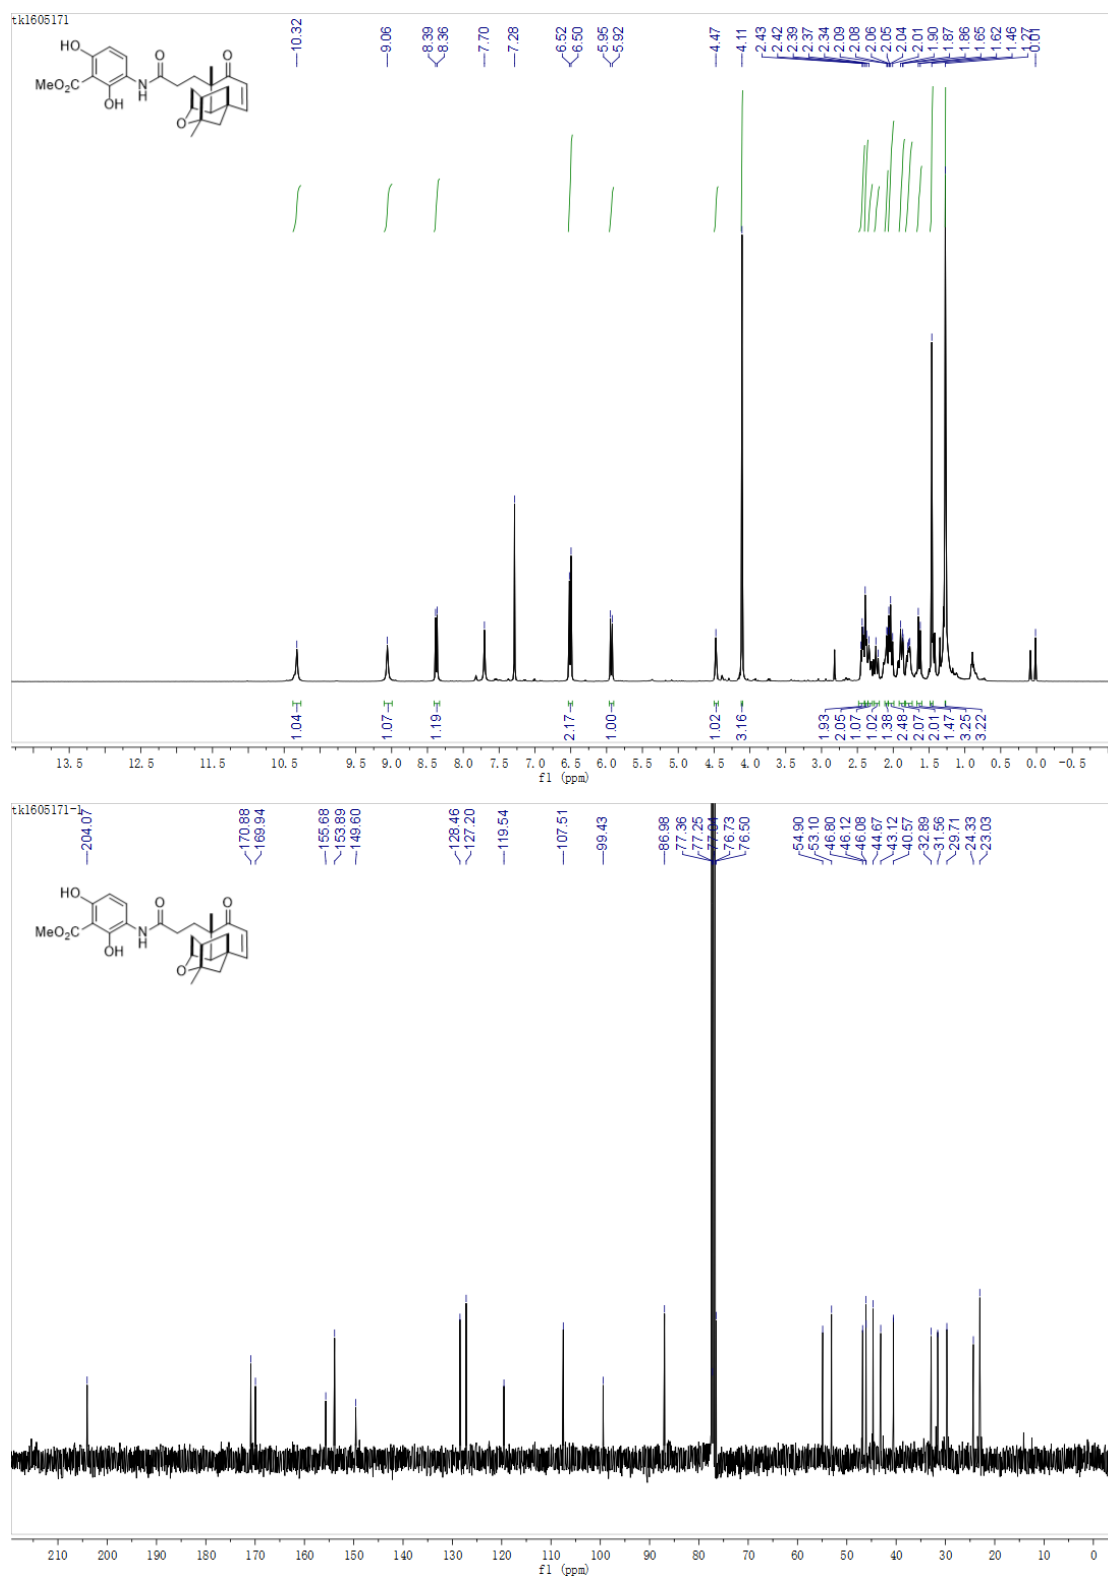

**Figure S16.**  $^1\text{H}$  NMR (400 MHz) and  $^{13}\text{C}$  NMR (101 MHz) spectrum of **26b** in MeOD

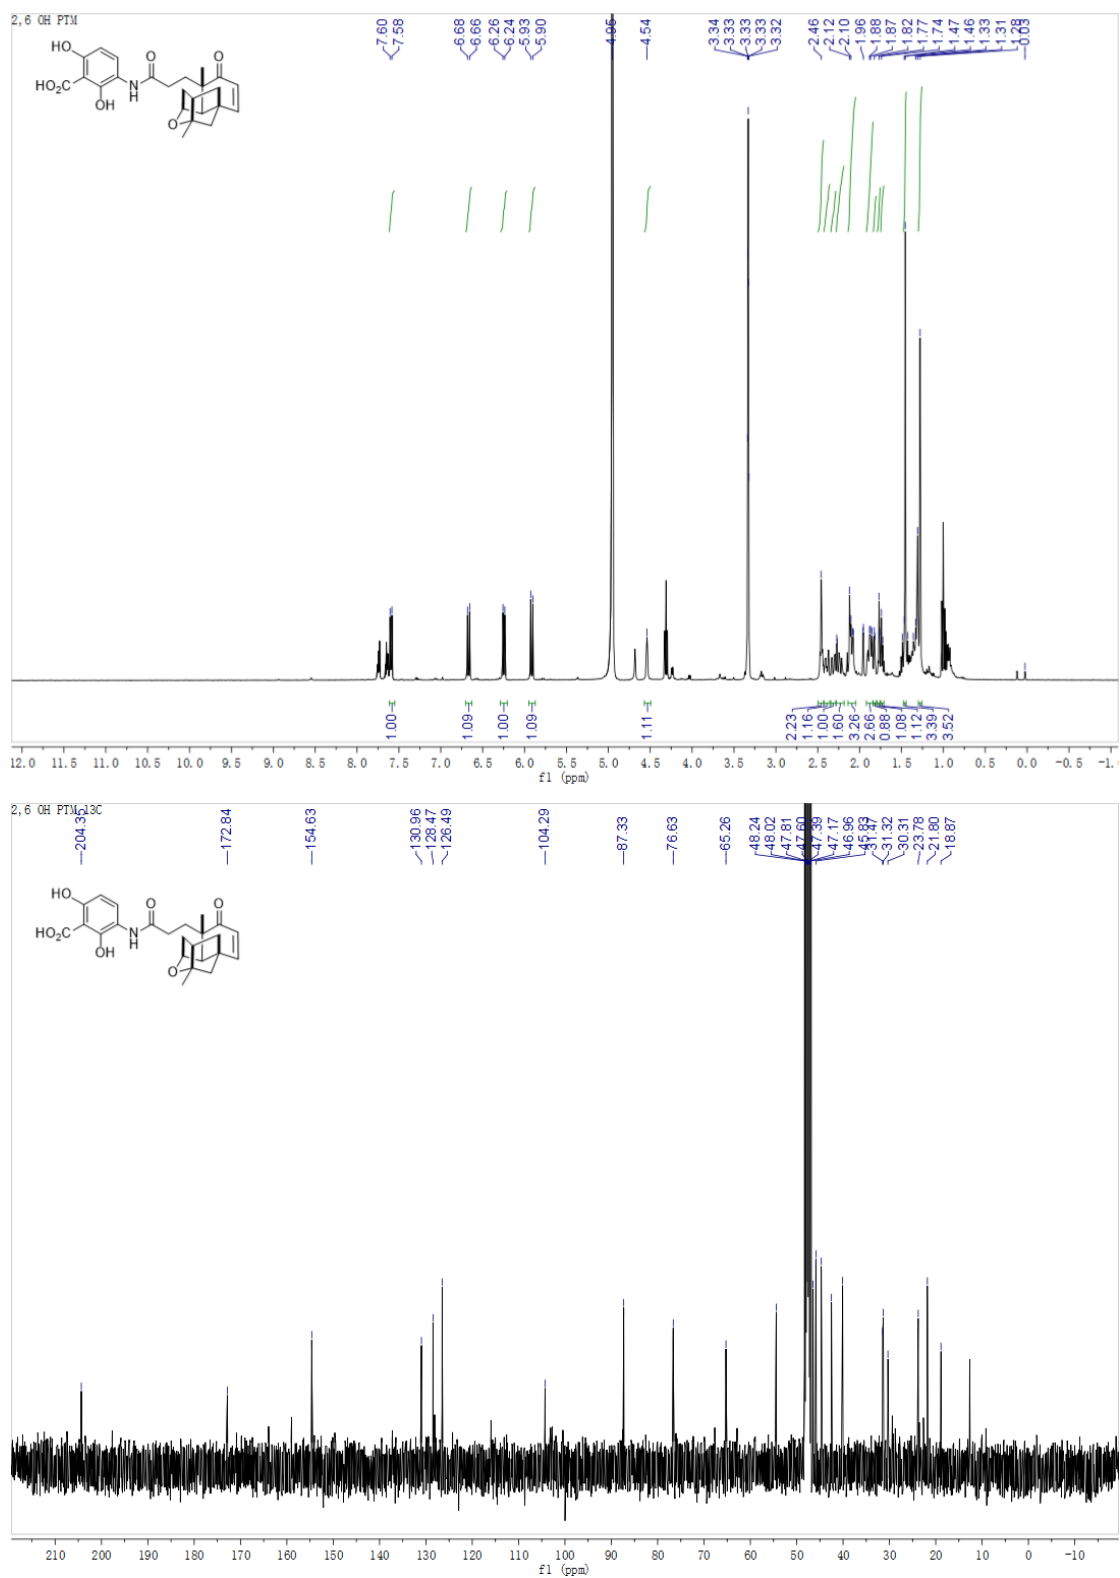

**Figure S17.**  $^1\text{H}$  NMR (400 MHz) and  $^{13}\text{C}$  NMR (101 MHz) spectrum of **27a** in  $\text{CDCl}_3$

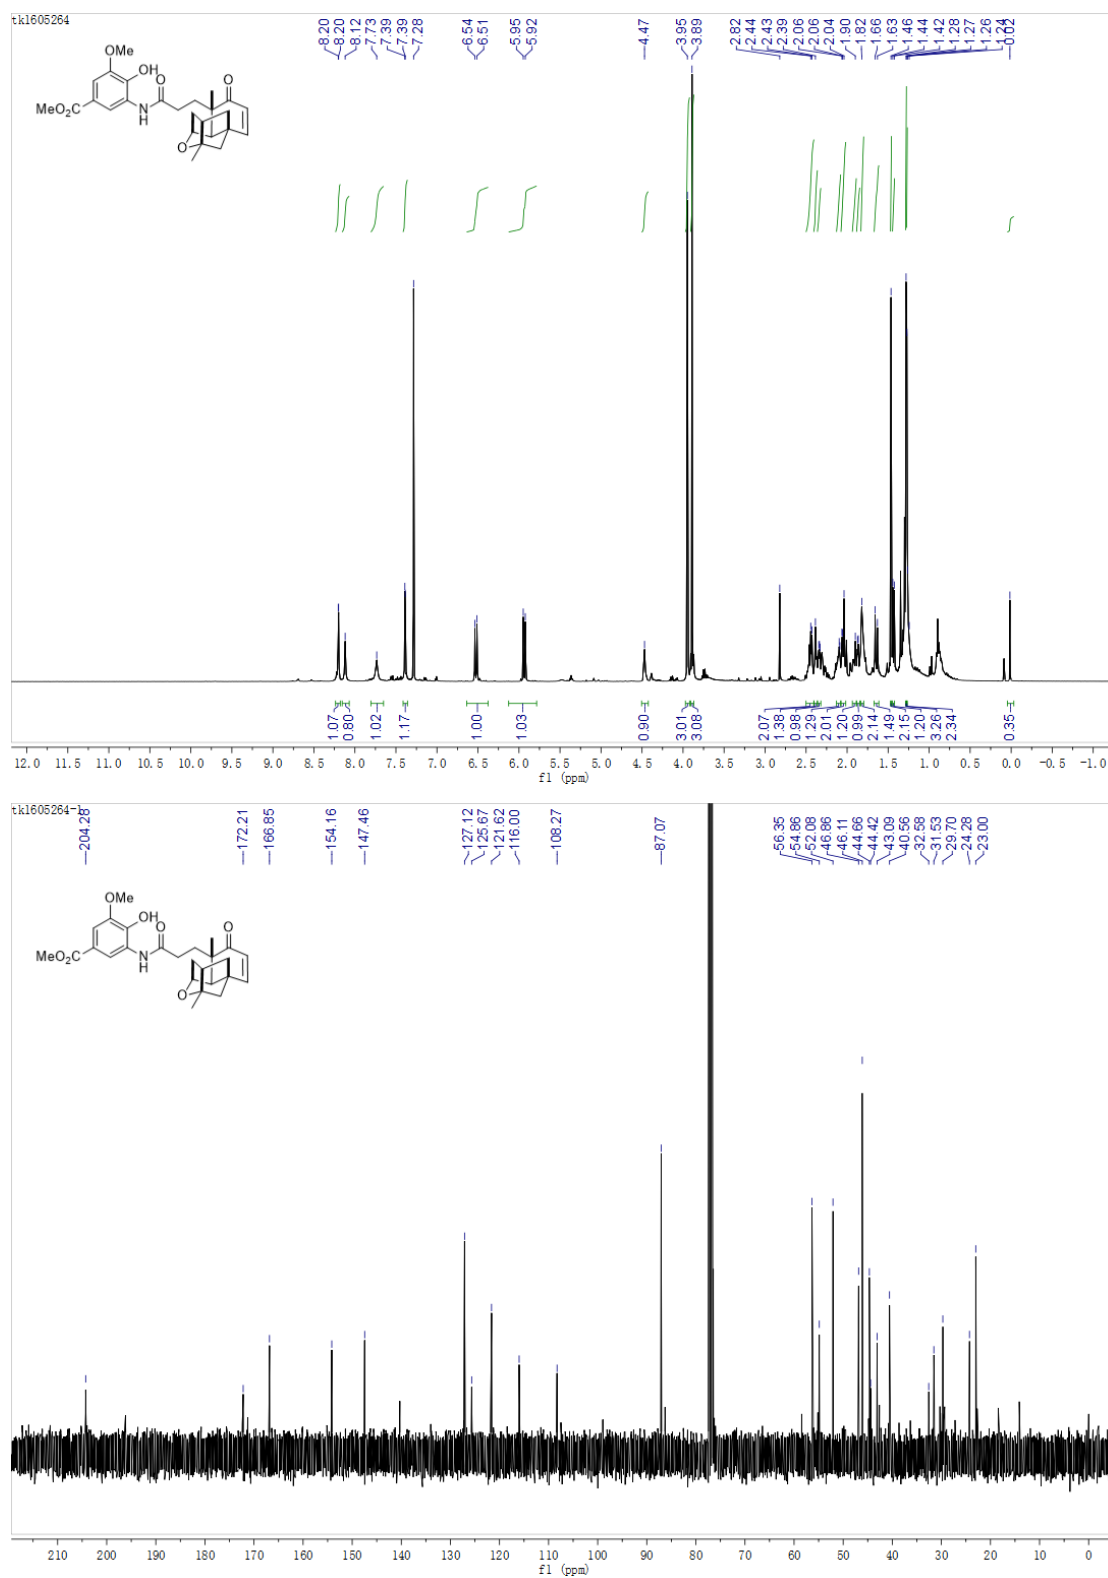



**Figure S18.**  $^1\text{H}$  NMR (500 MHz) and  $^{13}\text{C}$  NMR (126 MHz) spectrum of **27b** in  $\text{CDCl}_3$

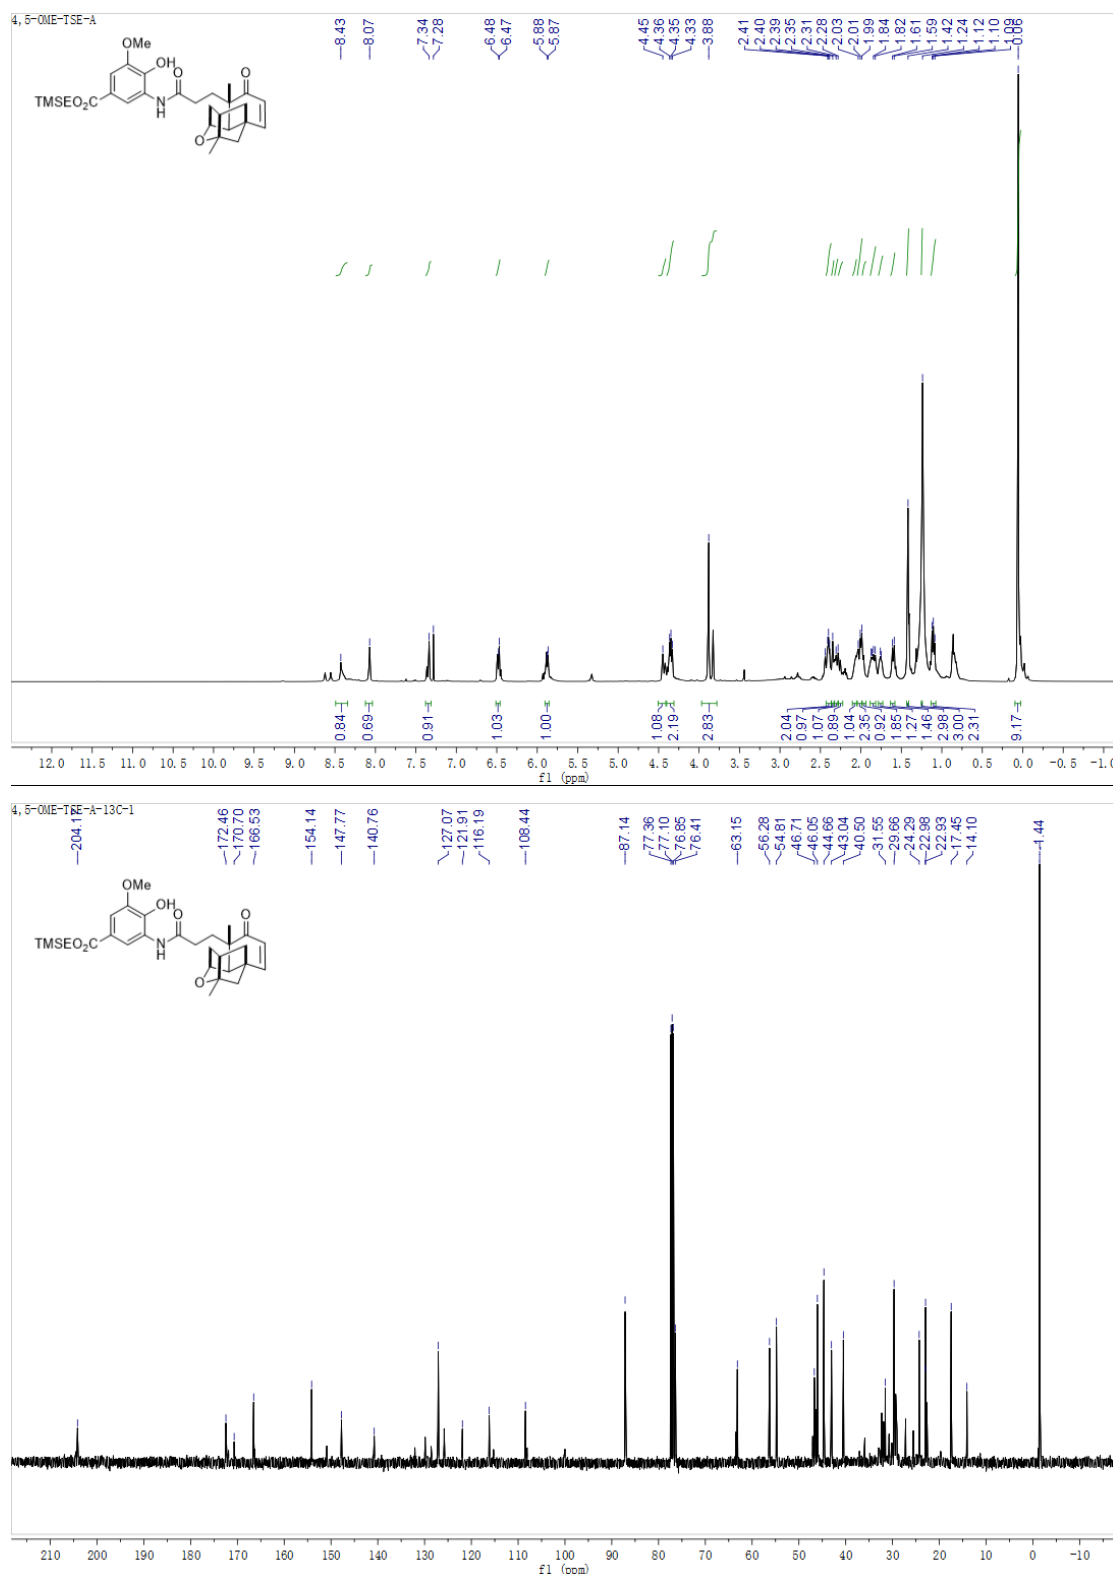

**Figure S19.**  $^1\text{H}$  NMR (500 MHz) and  $^{13}\text{C}$  NMR (126 MHz) spectrum of **28** in  $\text{DMSO-}d_6$

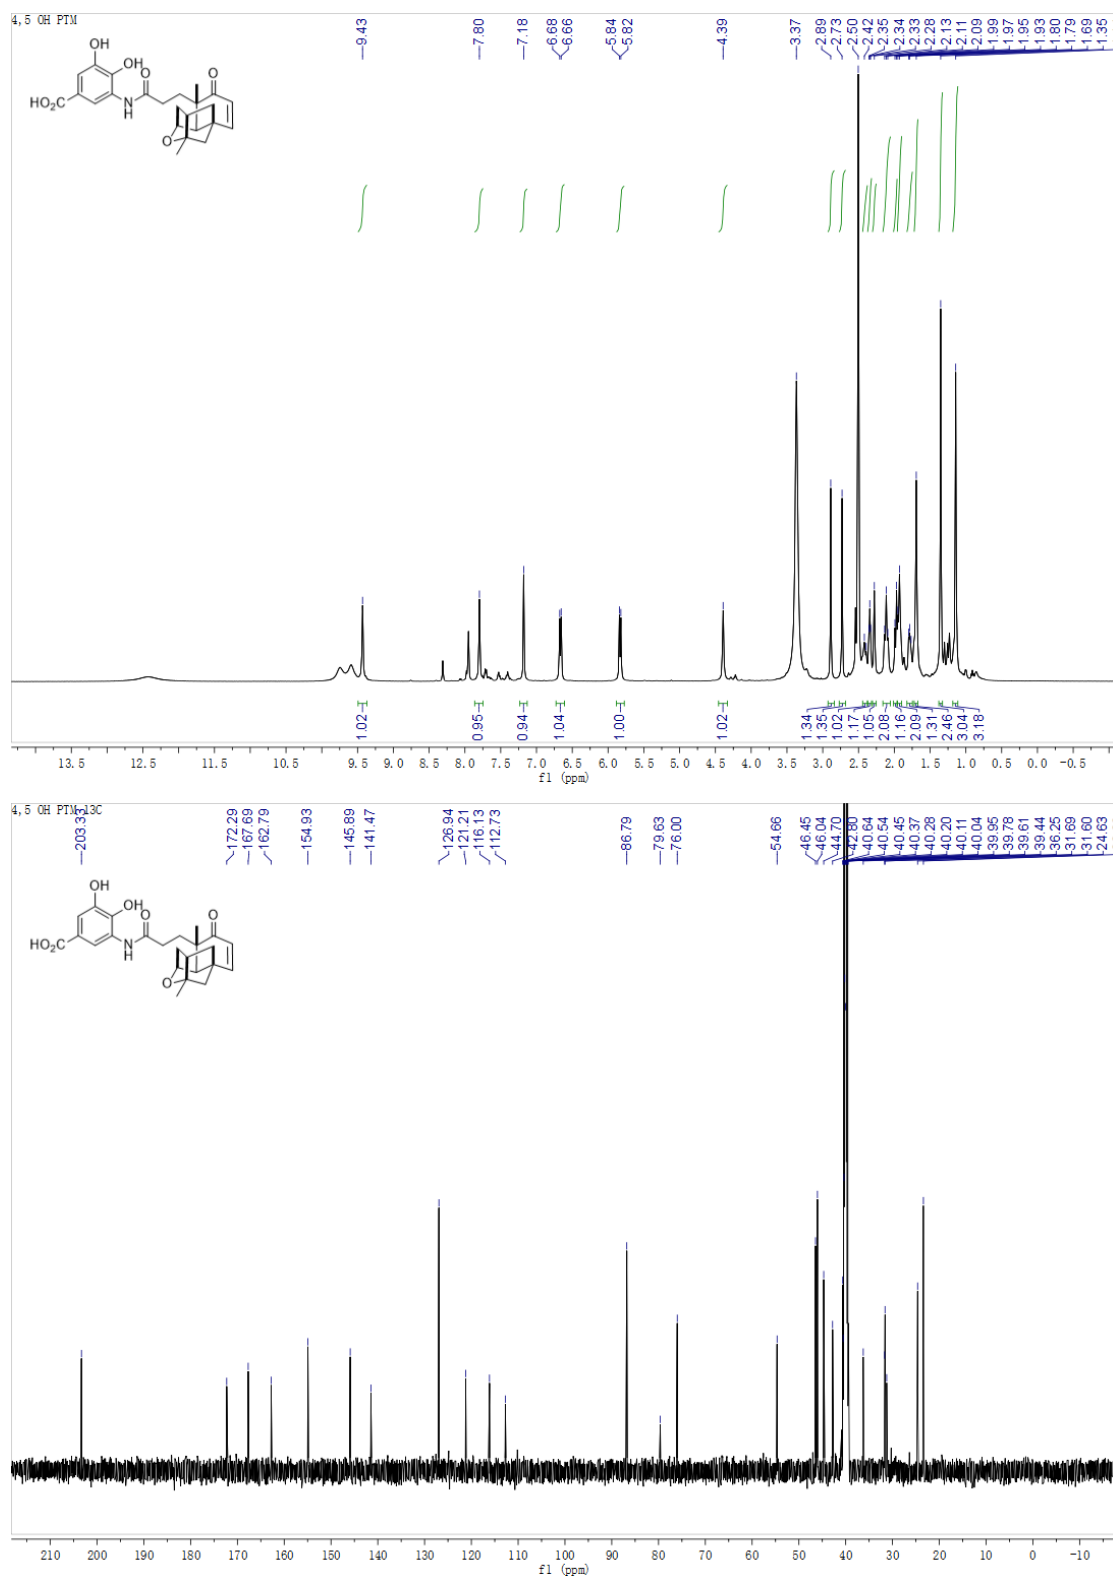

**Figure S20.**  $^1\text{H}$  NMR (400 MHz) and  $^{13}\text{C}$  NMR (101 MHz) spectrum of **29a** in  $\text{CDCl}_3$

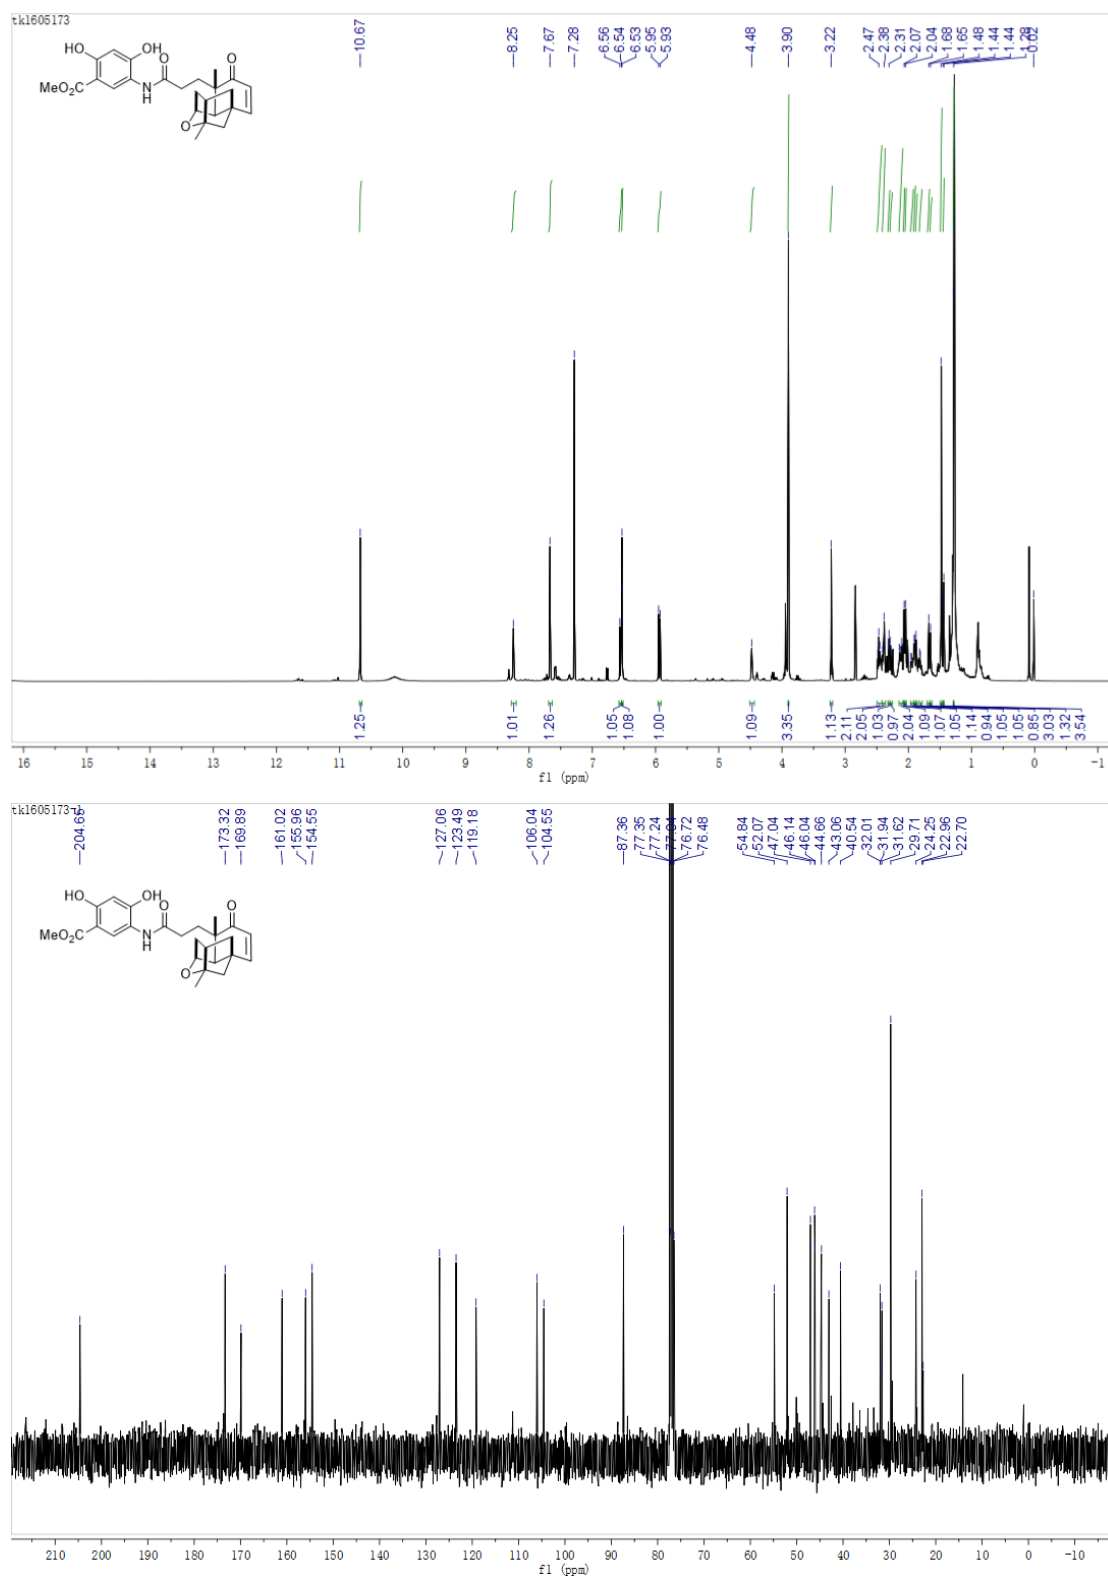

**Figure S21.**  $^1\text{H}$  NMR (500 MHz) and  $^{13}\text{C}$  NMR (126 MHz) spectrum of **29b** in  $\text{CDCl}_3$

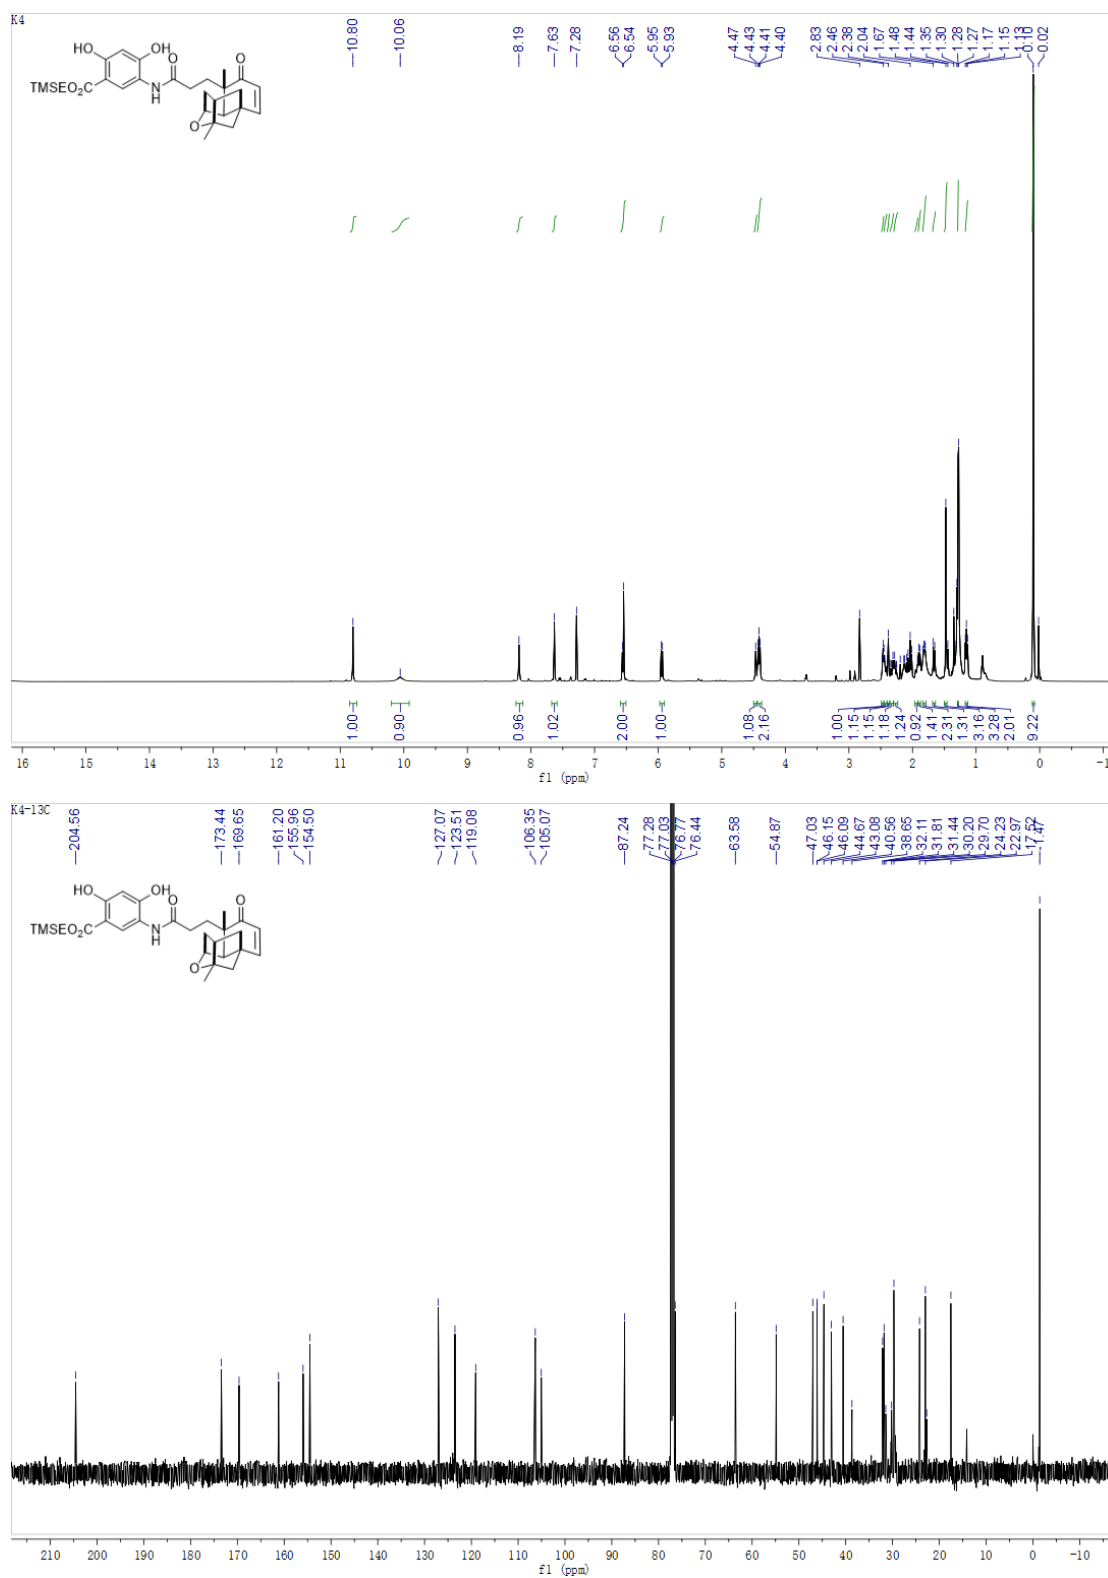

**Figure S22.**  $^1\text{H}$  NMR (400 MHz) and  $^{13}\text{C}$  NMR (101 MHz) spectrum of **30** in  $\text{CDCl}_3$

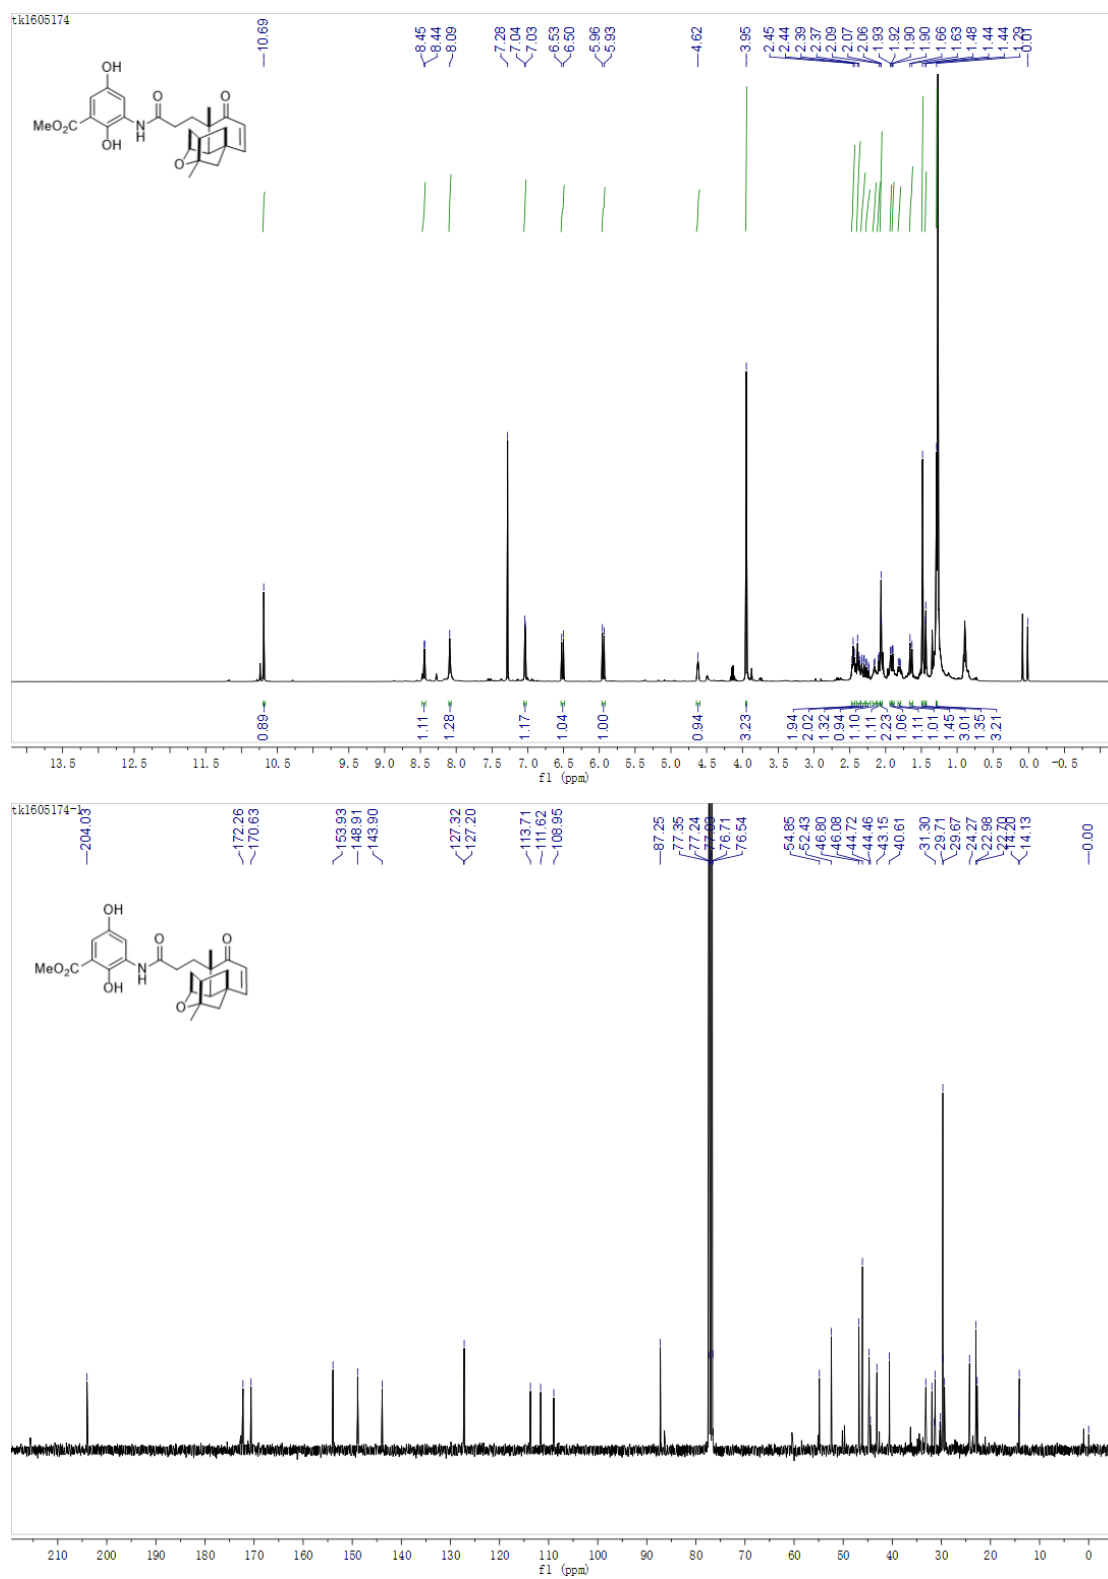

**Figure S23.**  $^1\text{H}$  NMR (500 MHz) and  $^{13}\text{C}$  NMR (126 MHz) spectrum of **25b** in  $\text{DMSO-}d_6$

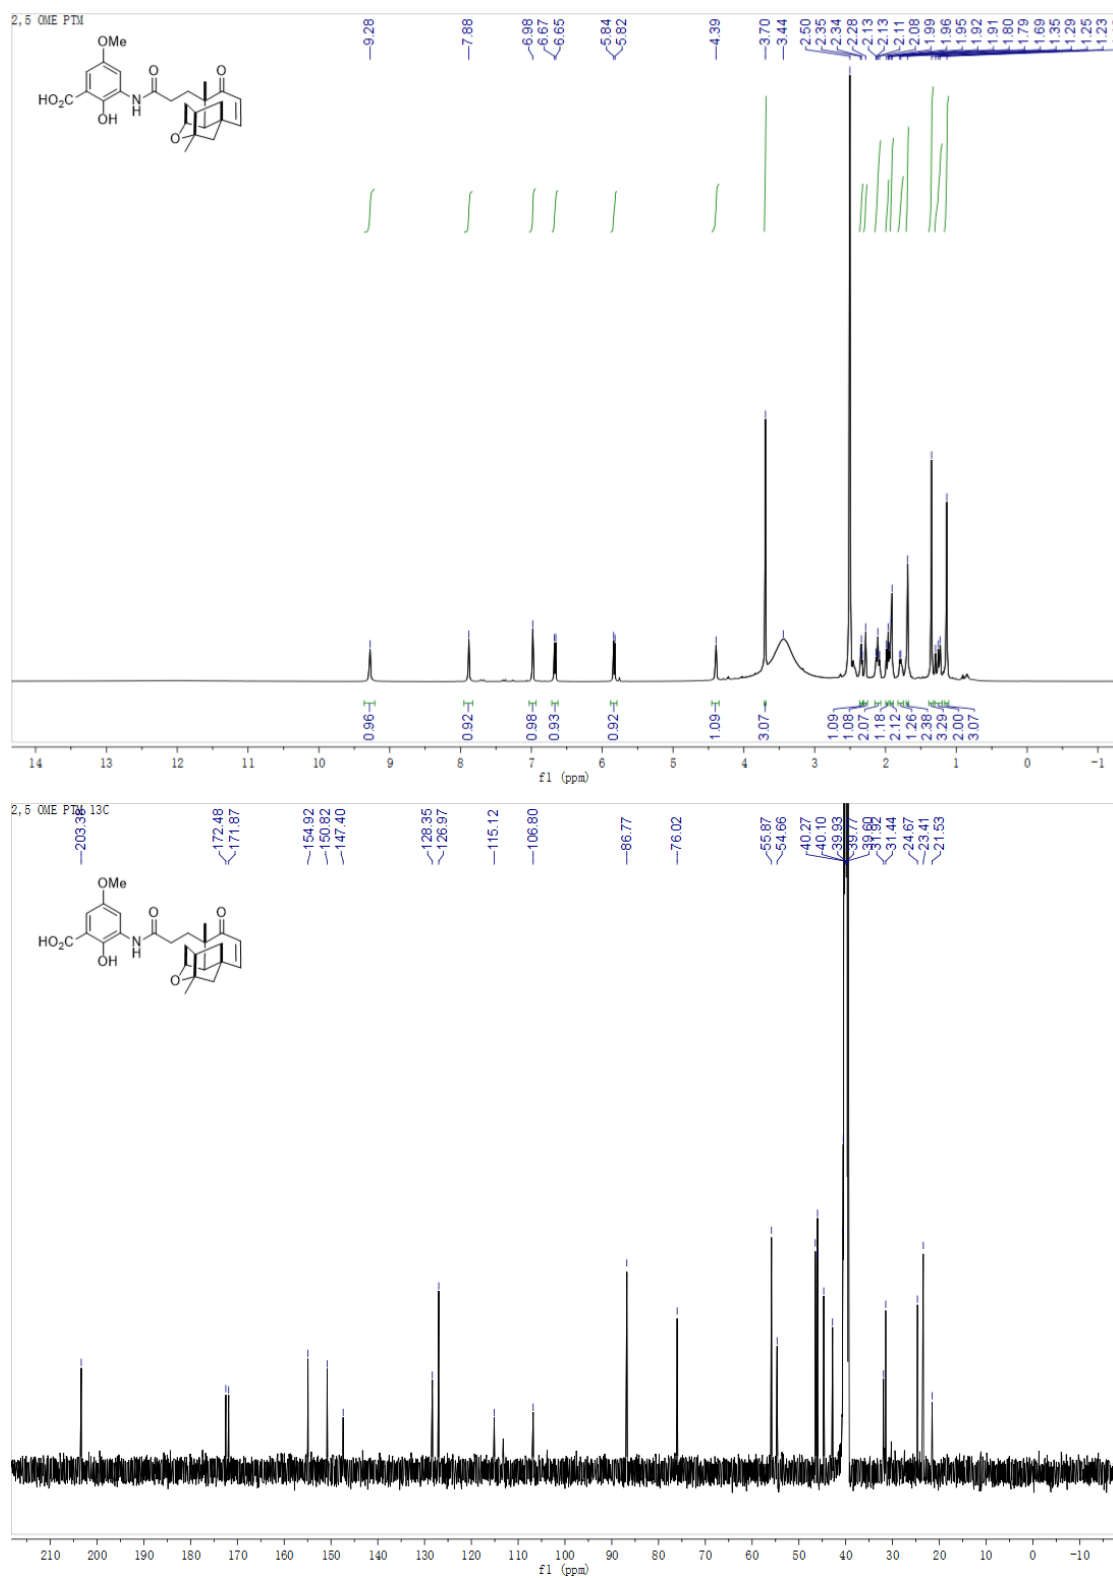

**Figure S24.**  $^1\text{H}$  NMR (500 MHz) and  $^{13}\text{C}$  NMR (126 MHz) spectrum of **27c** in MeOD

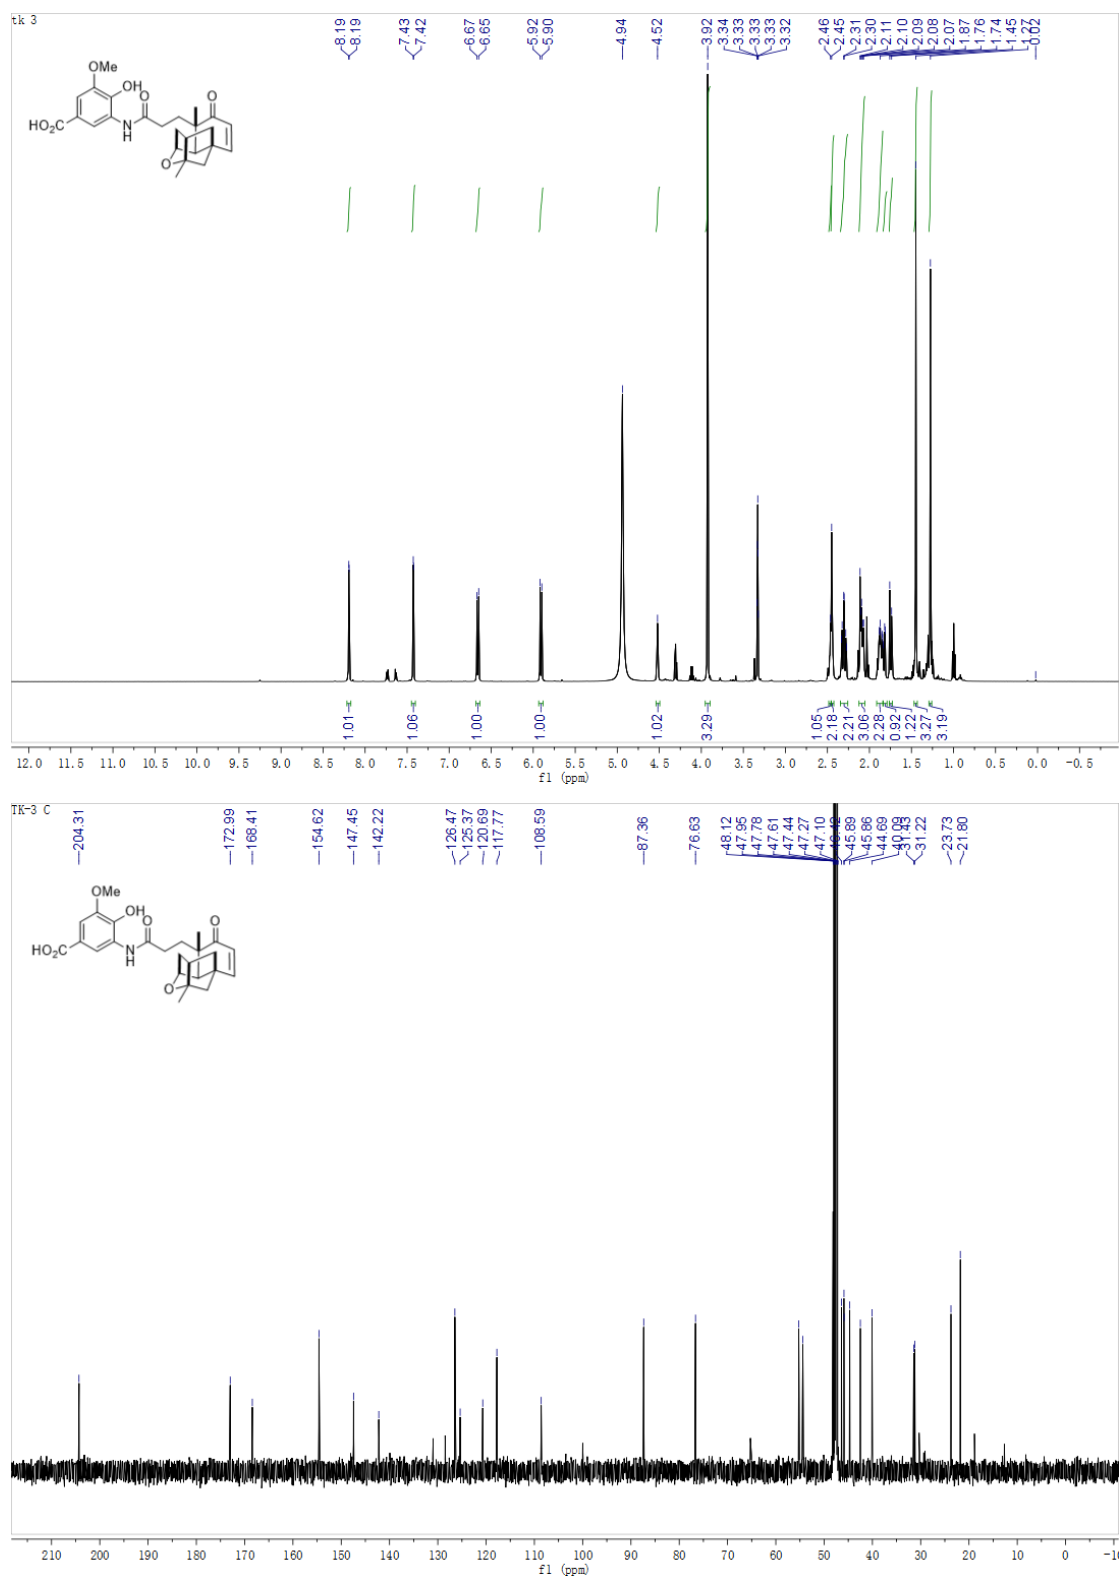

**Figure S25.**  $^1\text{H}$  NMR (400 MHz) and  $^{13}\text{C}$  NMR (101 MHz) spectrum of **29c** in MeOD

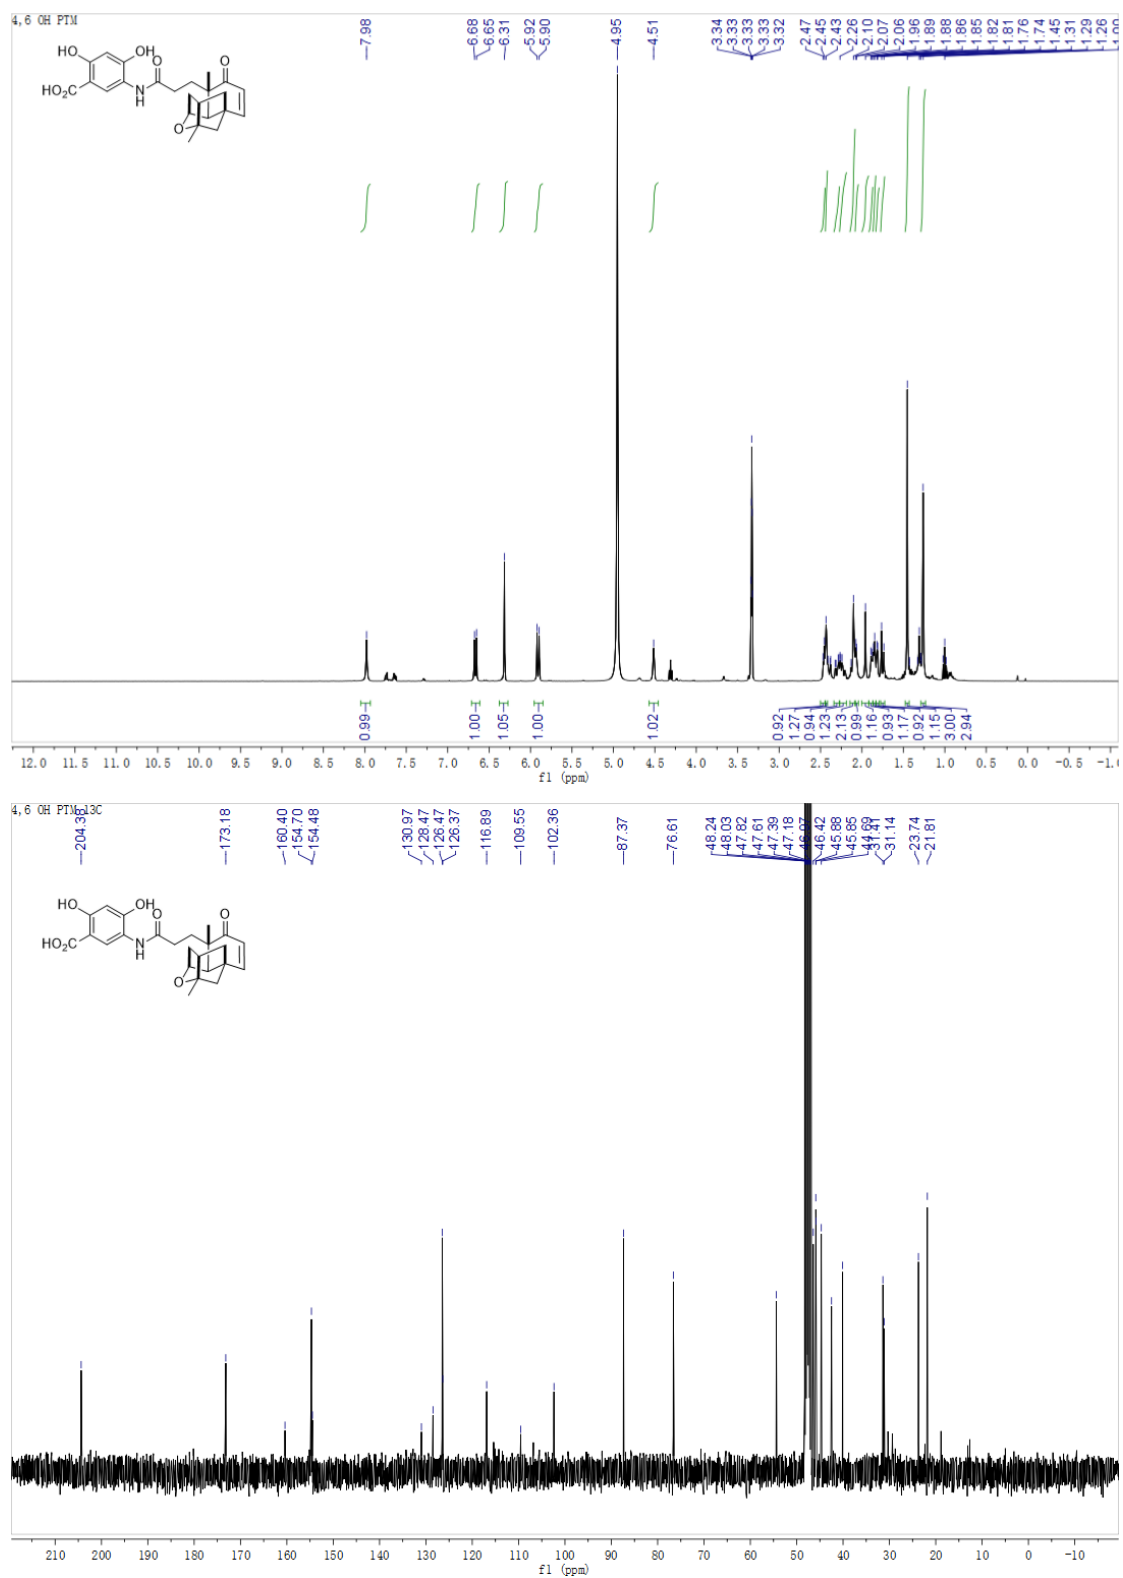



**Figure S26.**  $^1\text{H}$  NMR (400 MHz) and  $^{13}\text{C}$  NMR (101 MHz) spectrum of **4** in  $\text{CDCl}_3$

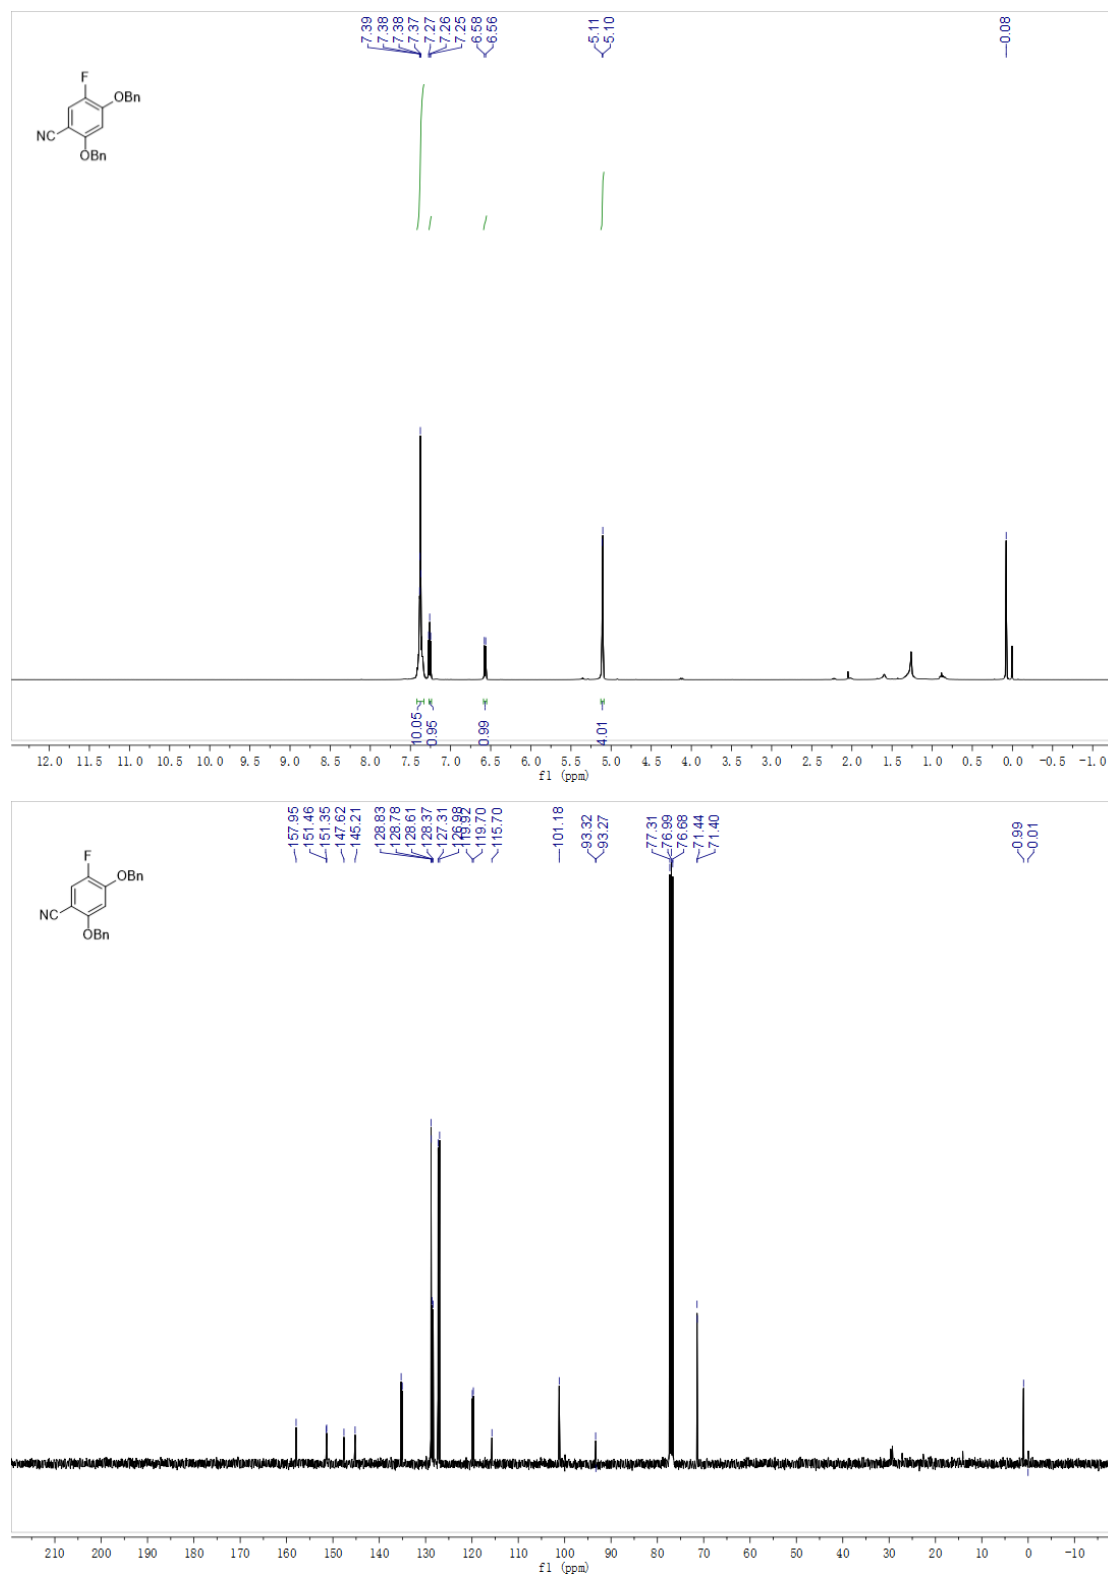

**Figure S27.**  $^1\text{H}$  NMR (400 MHz) and  $^{13}\text{C}$  NMR (101 MHz) spectrum of **5** in  $\text{CDCl}_3$

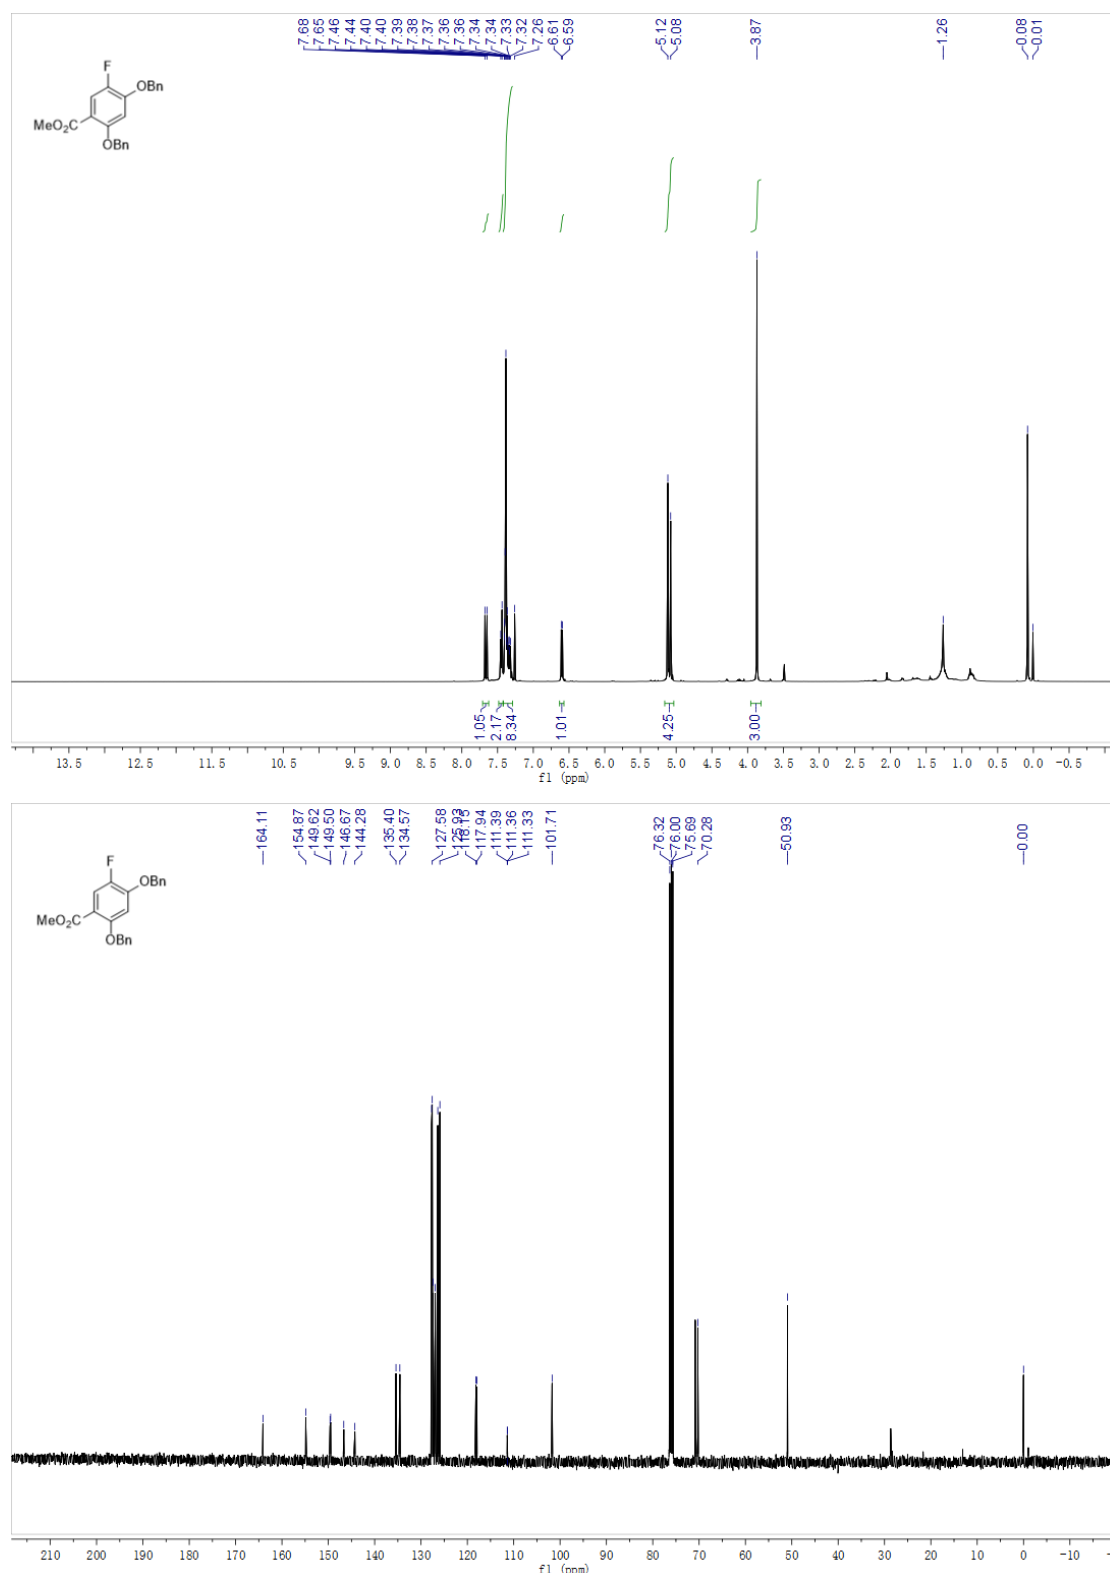

**Figure S28.**  $^1\text{H}$  NMR (400 MHz) and  $^{13}\text{C}$  NMR (101 MHz) spectrum of **S9** in  $\text{CDCl}_3$

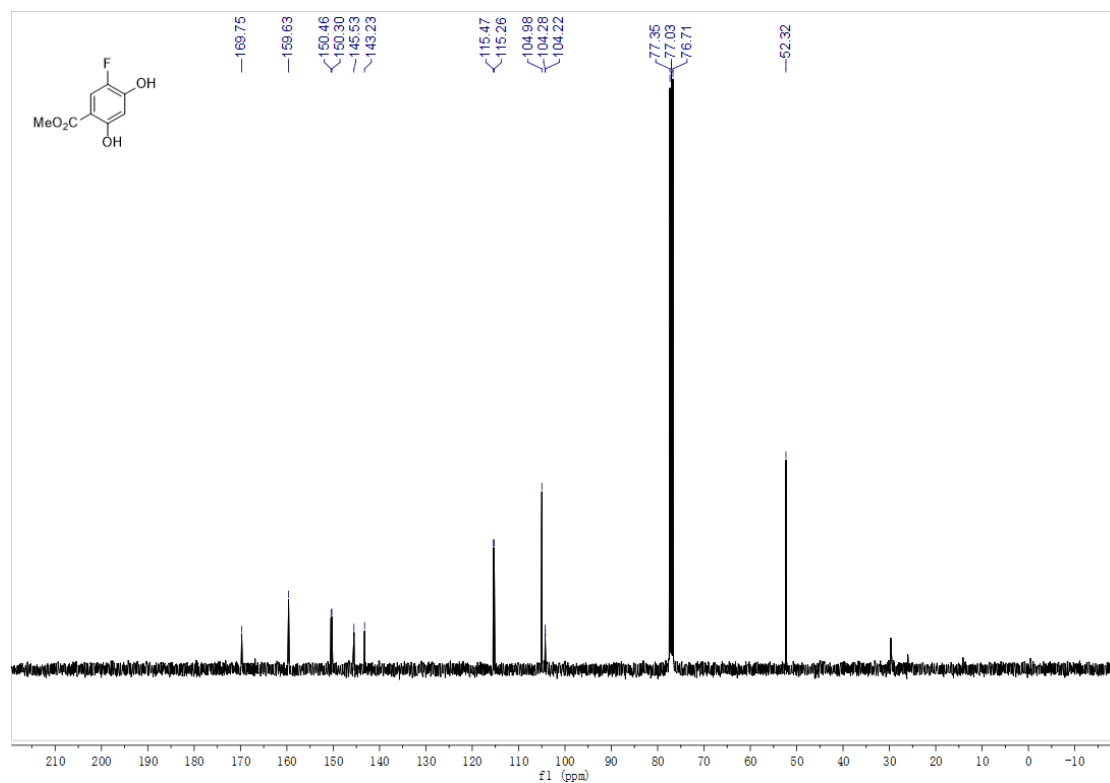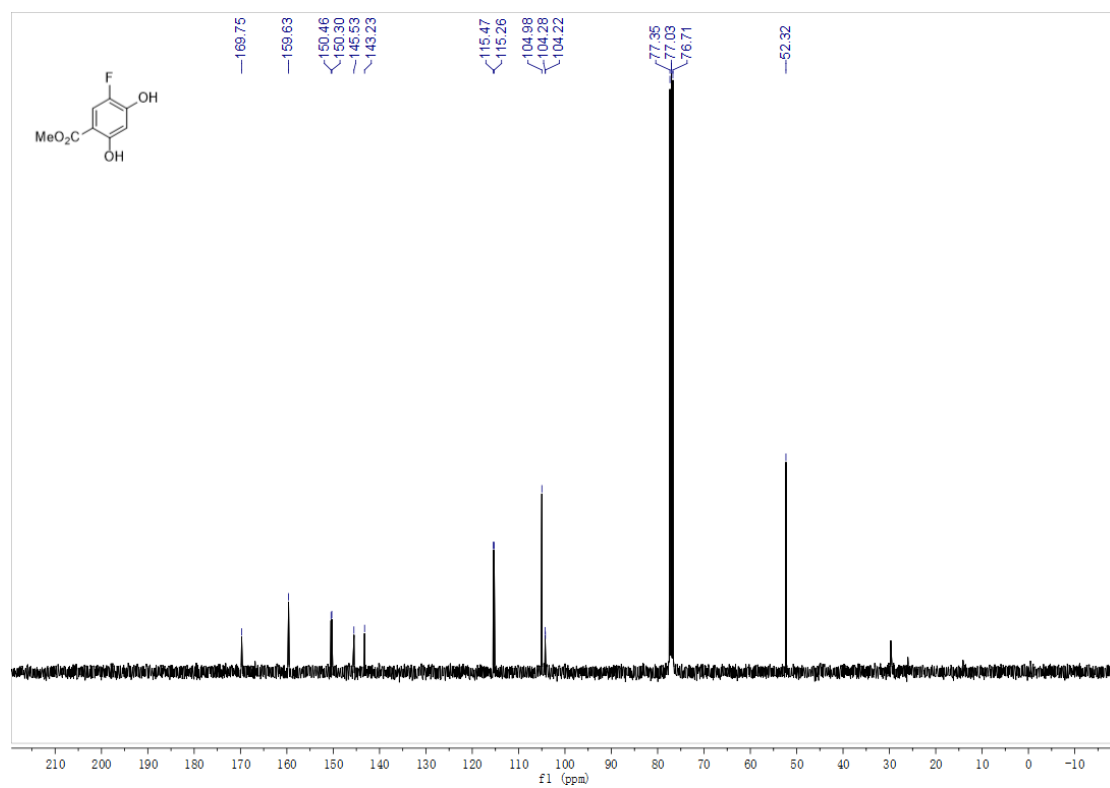

**Figure S29.**  $^1\text{H}$  NMR (400 MHz) and  $^{13}\text{C}$  NMR (101 MHz) spectrum of **6** in  $\text{DMSO-}d_6$

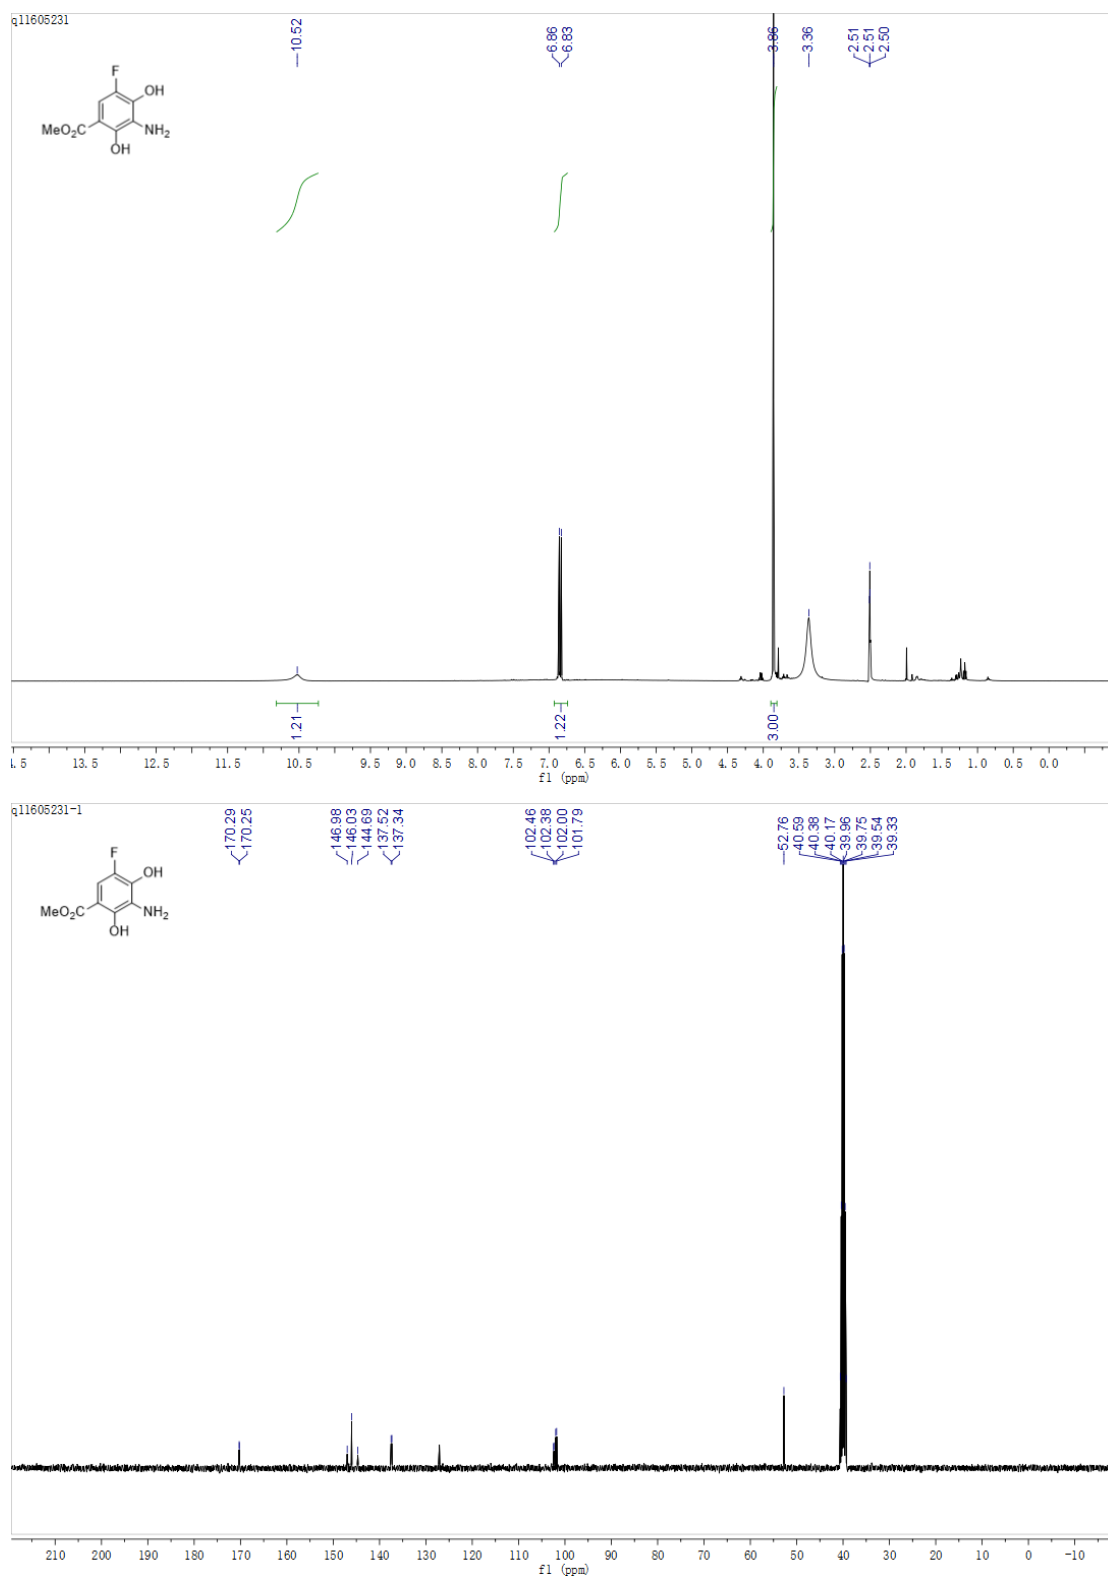

**Figure S30.**  $^1\text{H}$  NMR (400 MHz) and  $^{13}\text{C}$  NMR (101 MHz) spectrum of **13** in  $\text{CDCl}_3$ .

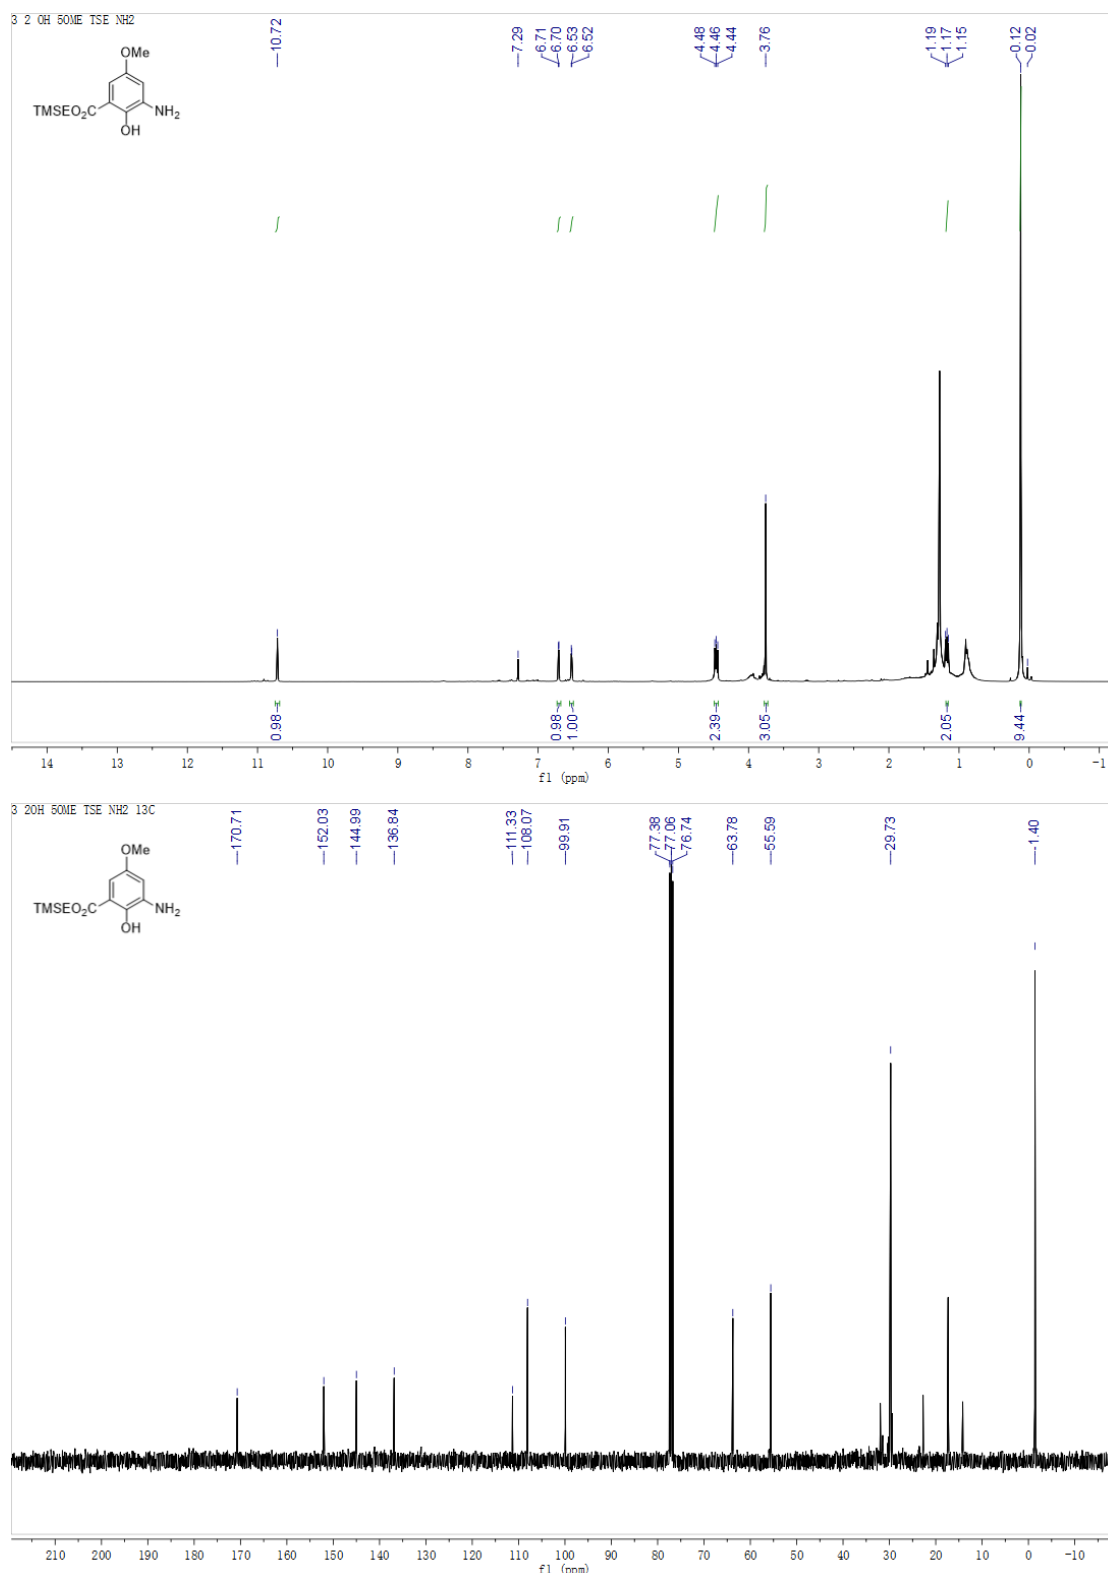

**Figure S31.**  $^1\text{H}$  NMR (400 MHz) and  $^{13}\text{C}$  NMR (101 MHz) spectrum of **15a** in  $\text{CDCl}_3$ .

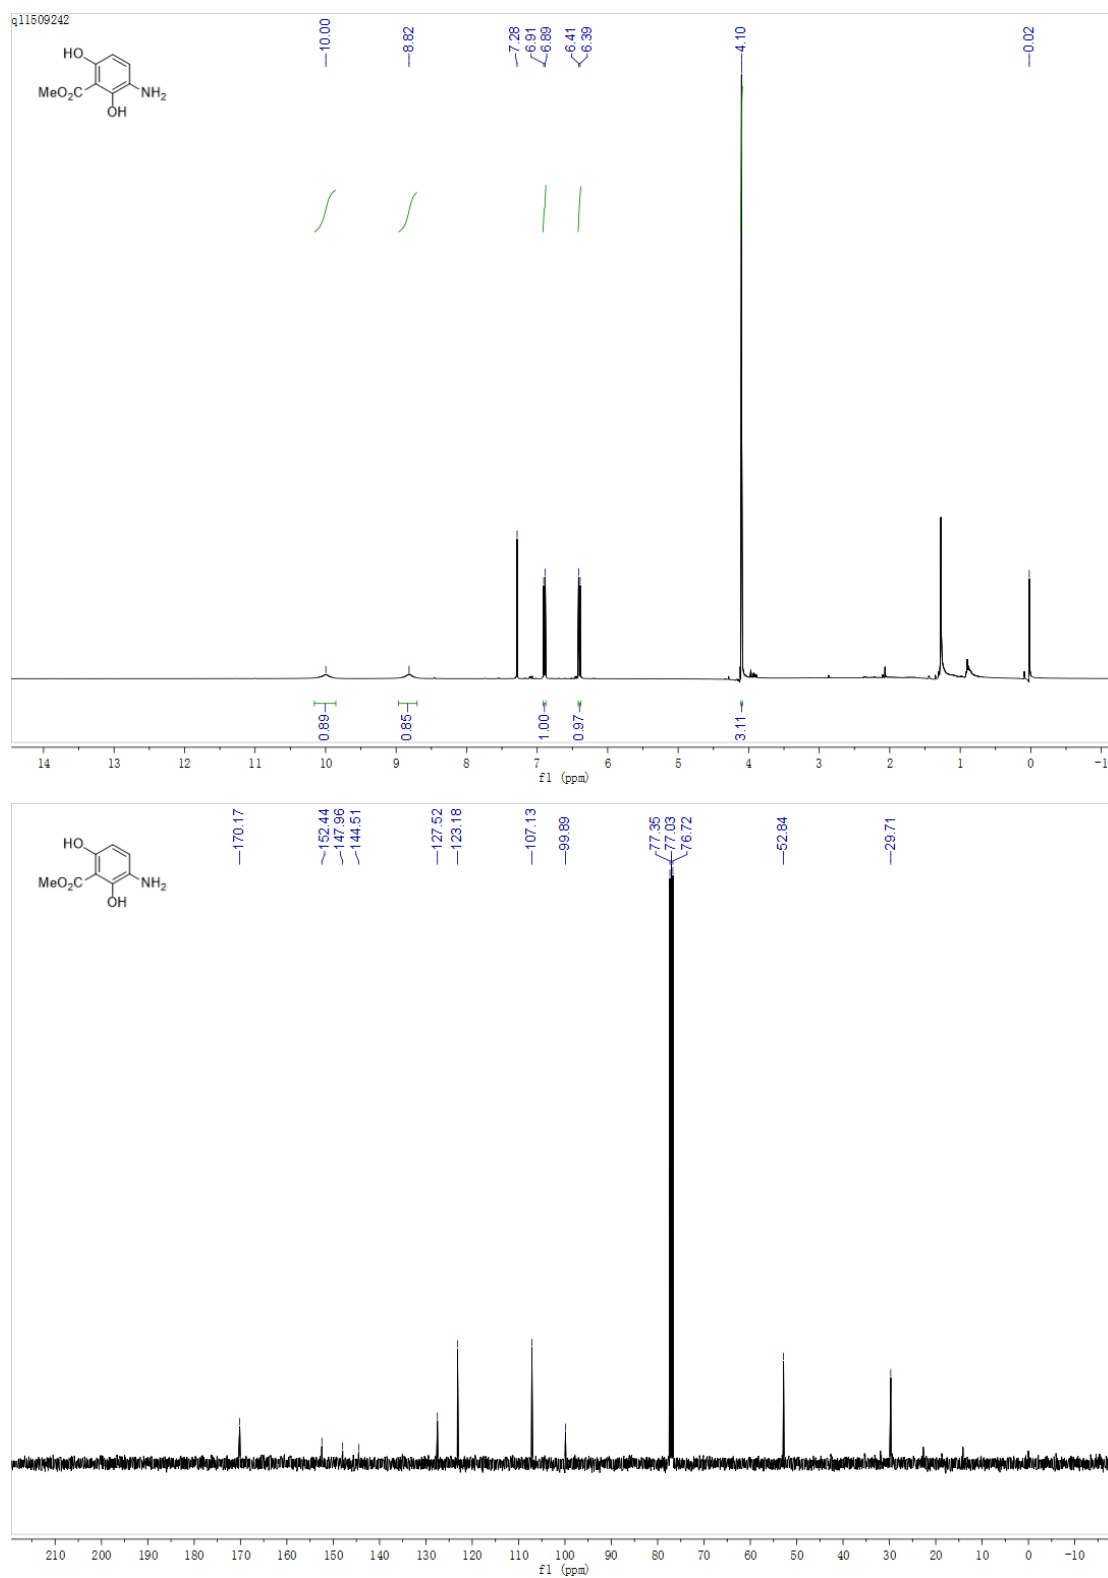

**Figure S32.**  $^1\text{H}$  NMR (500 MHz) and  $^{13}\text{C}$  NMR (126 MHz) spectrum of **15b** in  $\text{DMSO-}d_6$

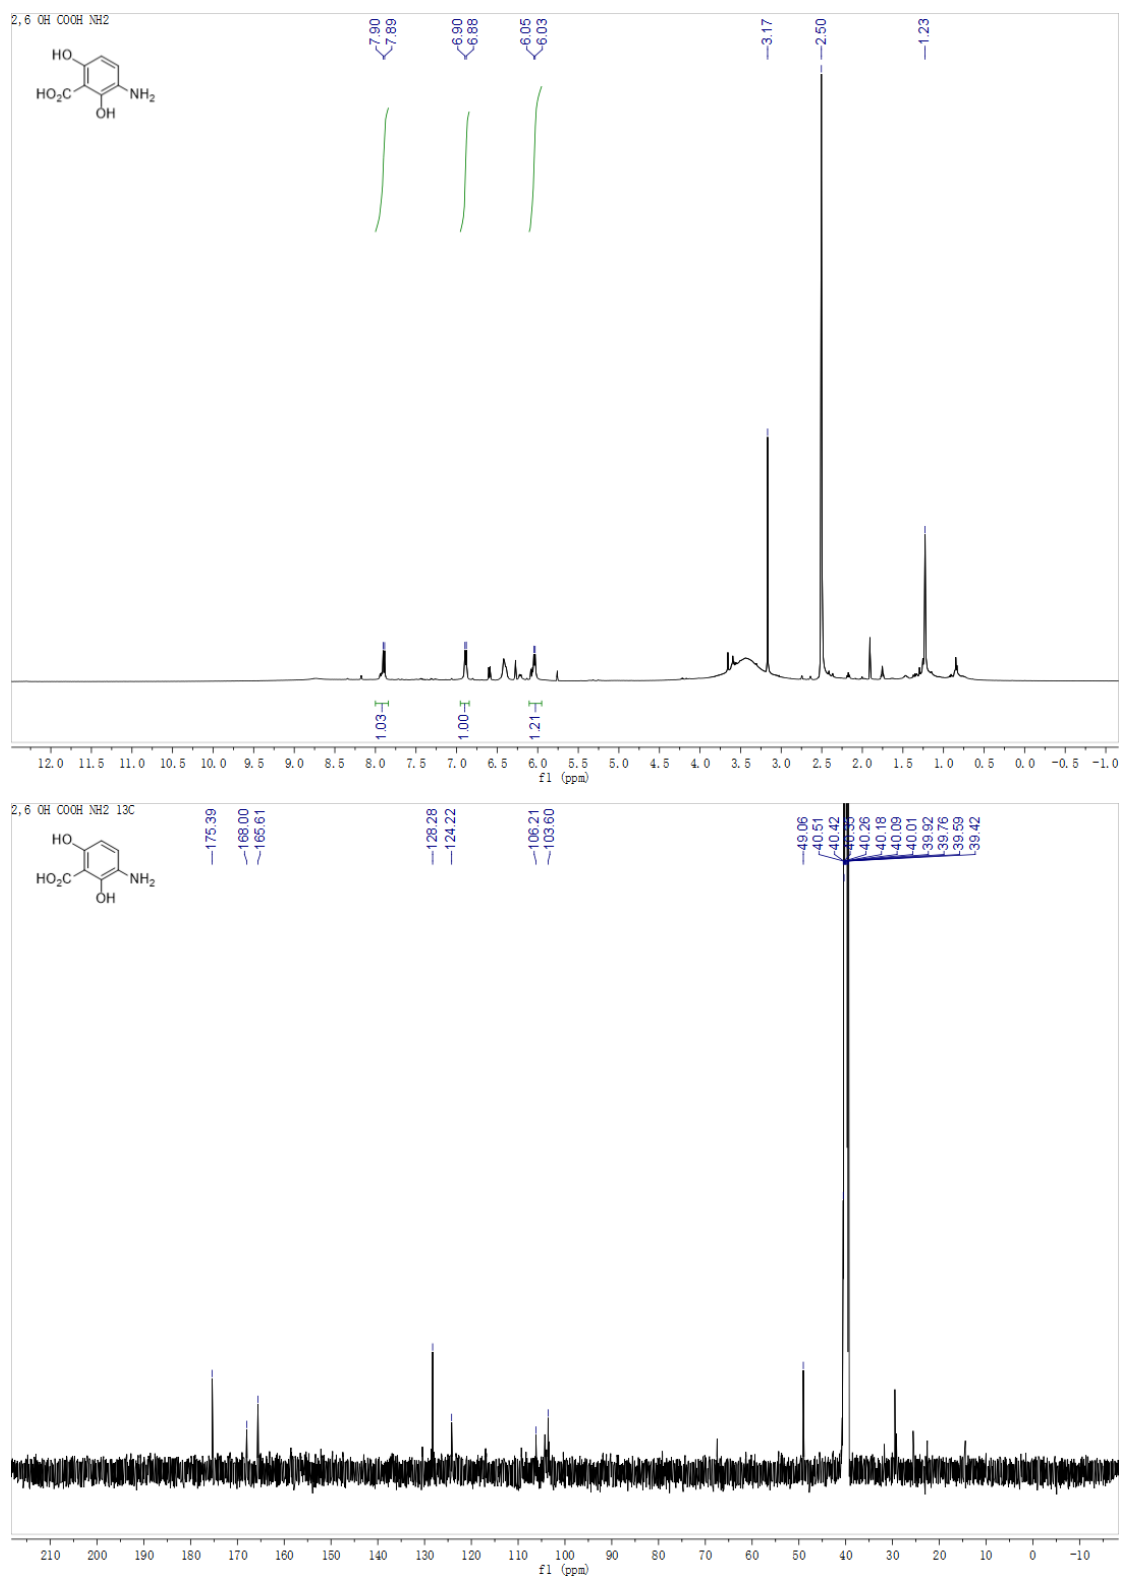

**Figure S33.**  $^1\text{H}$  NMR (400 MHz) and  $^{13}\text{C}$  NMR (101 MHz) spectrum of **17a** in  $\text{CDCl}_3$ .

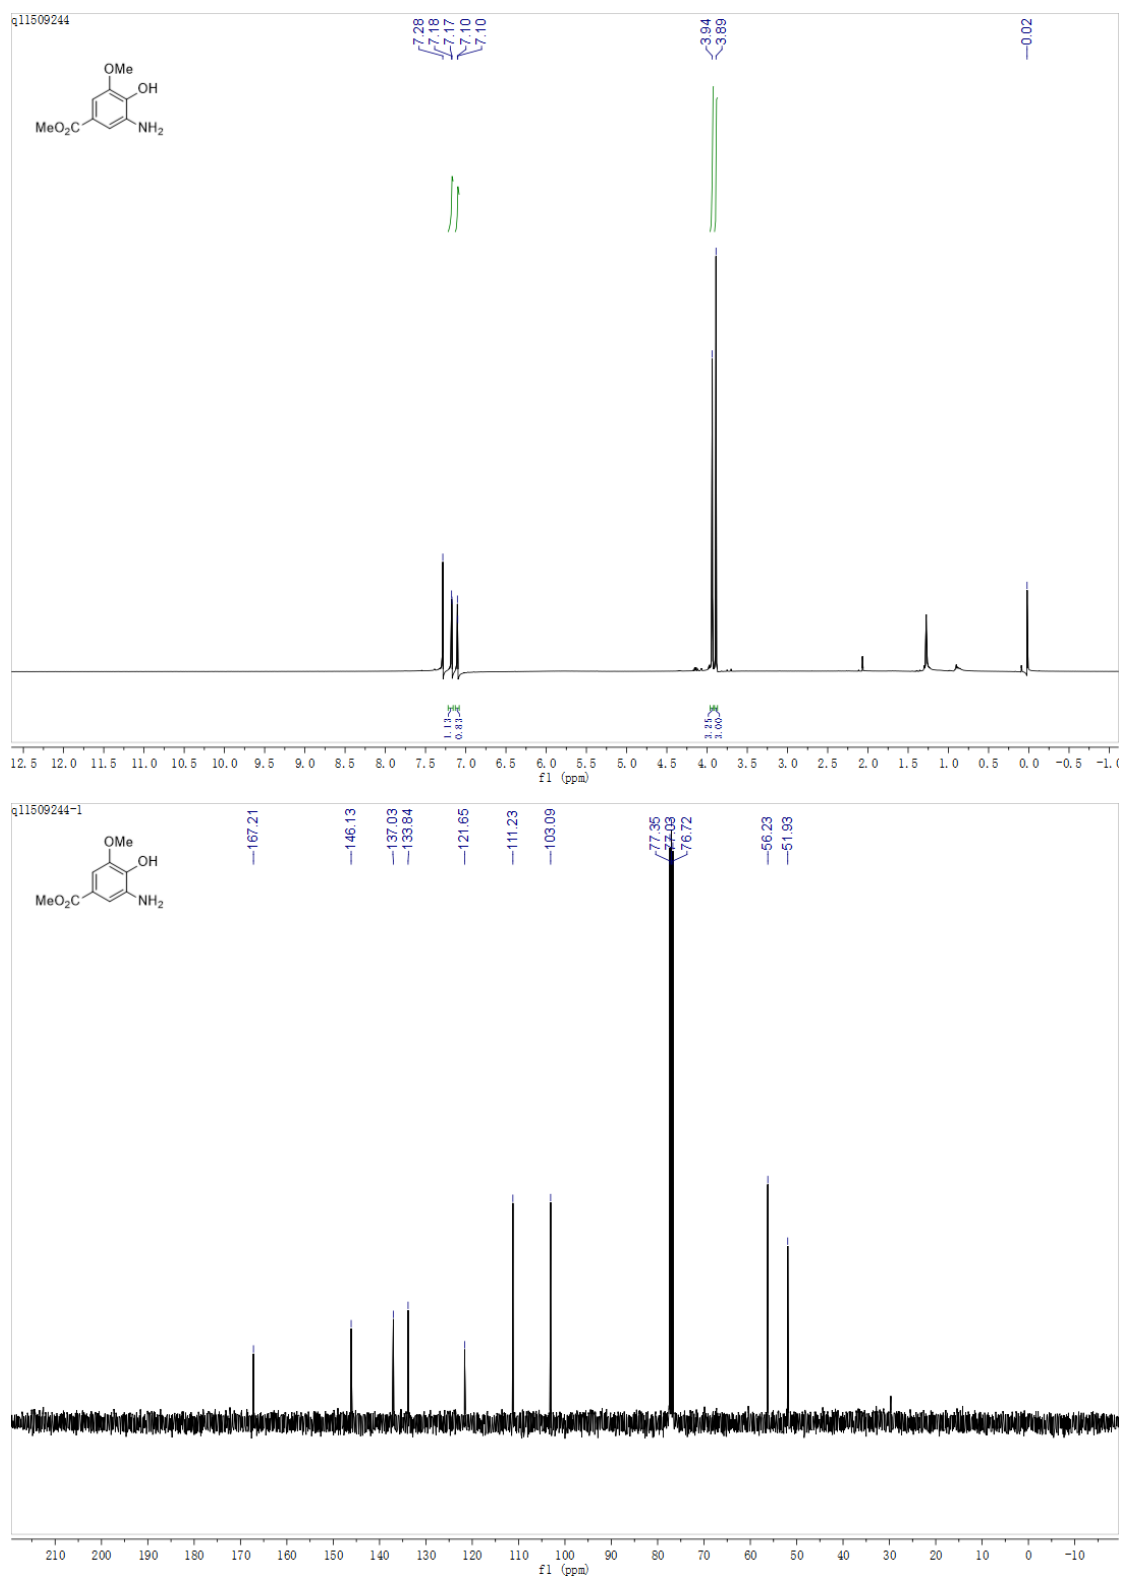



**Figure S34.**  $^1\text{H}$  NMR (400 MHz) and  $^{13}\text{C}$  NMR (101 MHz) spectrum of **17b** in  $\text{CDCl}_3$ .

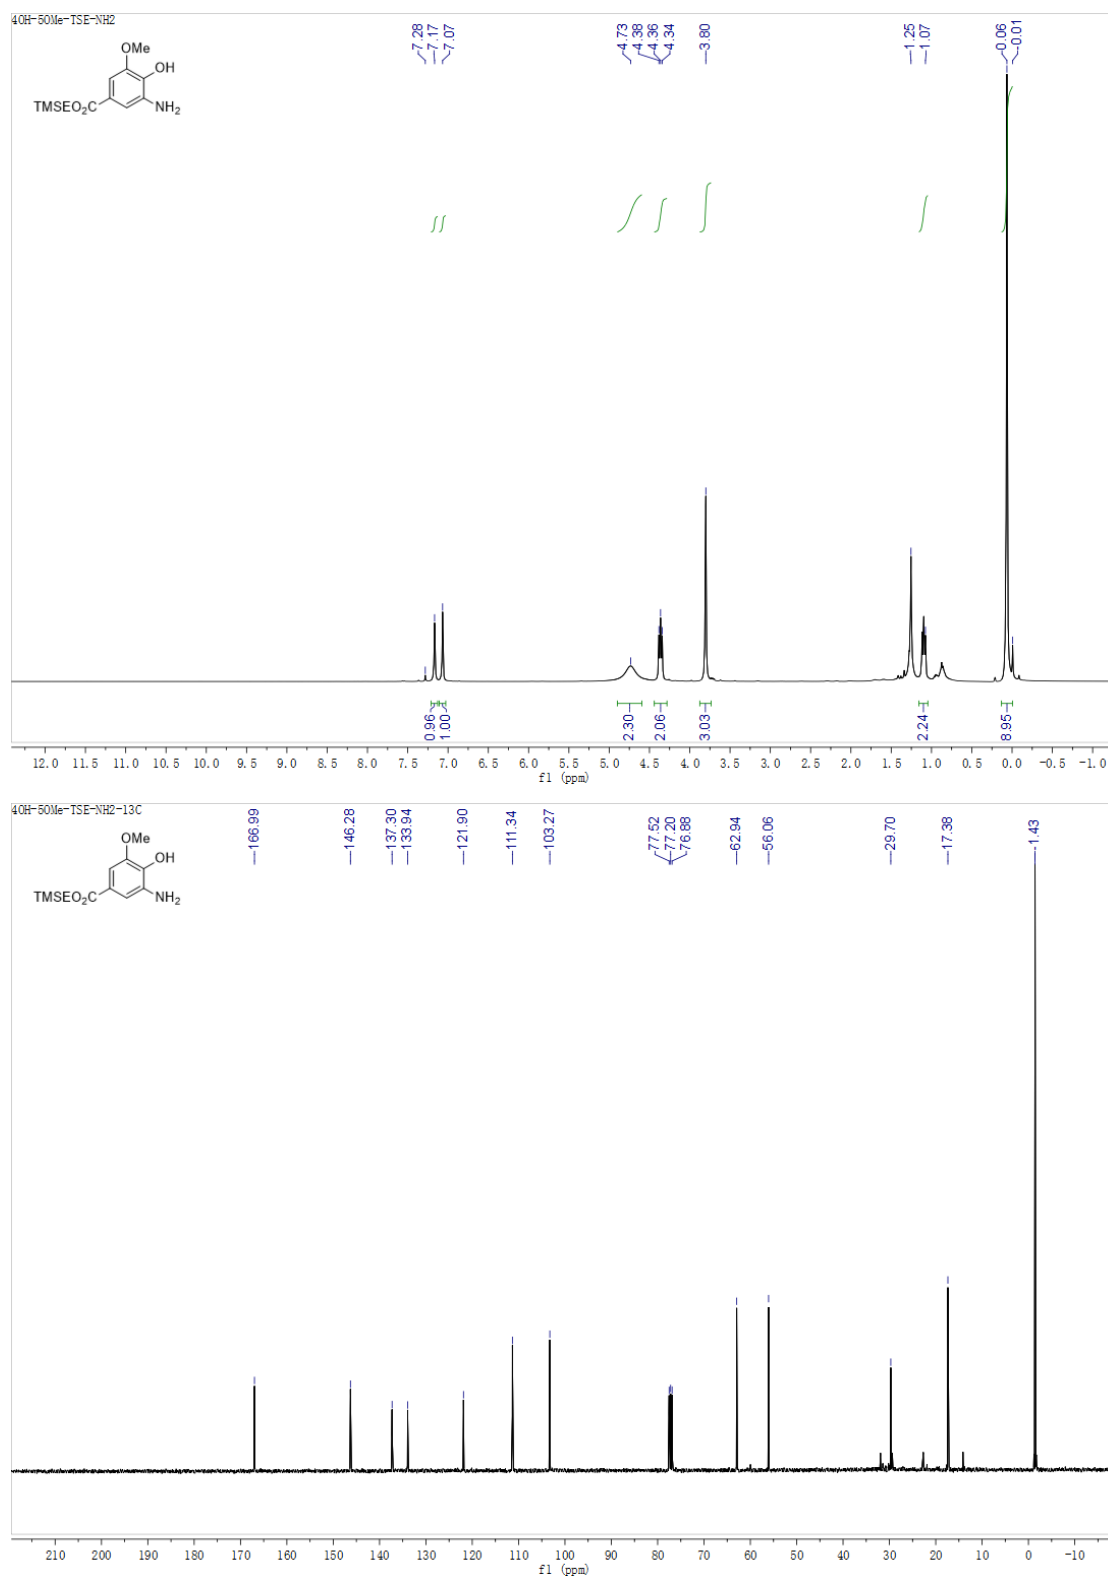

**Figure S35.**  $^1\text{H}$  NMR (400 MHz) and  $^{13}\text{C}$  NMR (101 MHz) spectrum of **19** in  $\text{DMSO-}d_6$

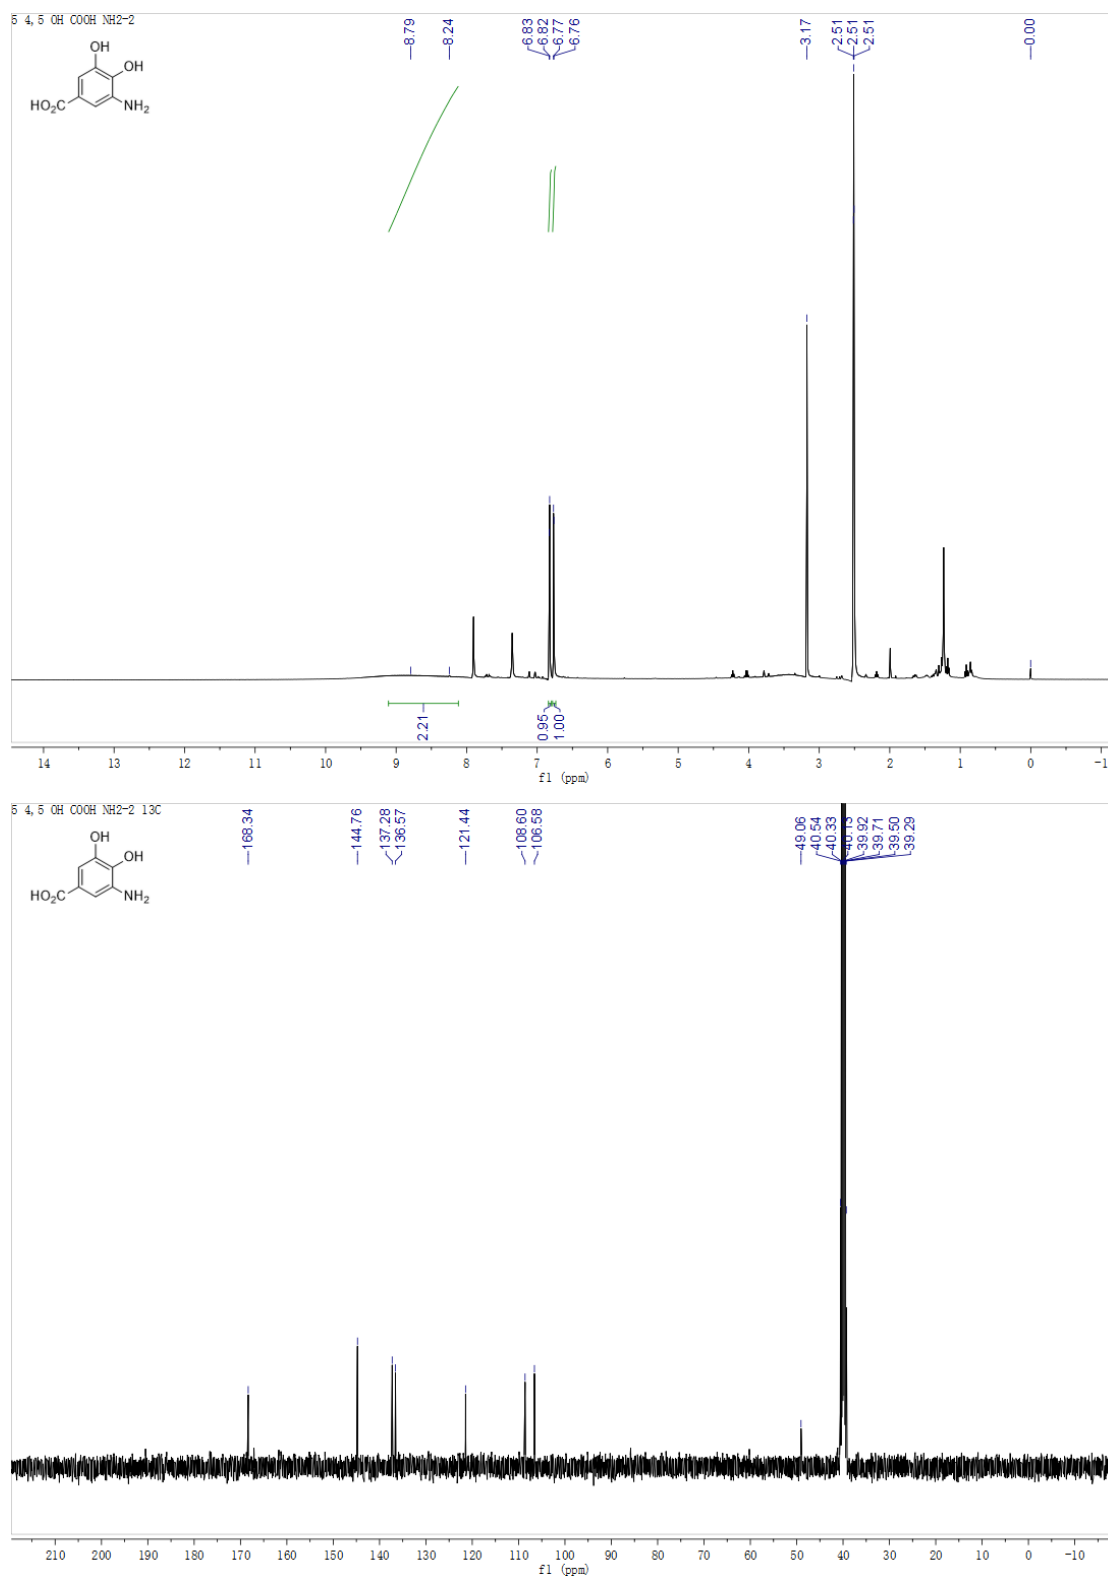

**Figure S36.**  $^1\text{H}$  NMR (400 MHz) and  $^{13}\text{C}$  NMR (101 MHz) spectrum of **21b** in  $\text{CDCl}_3$

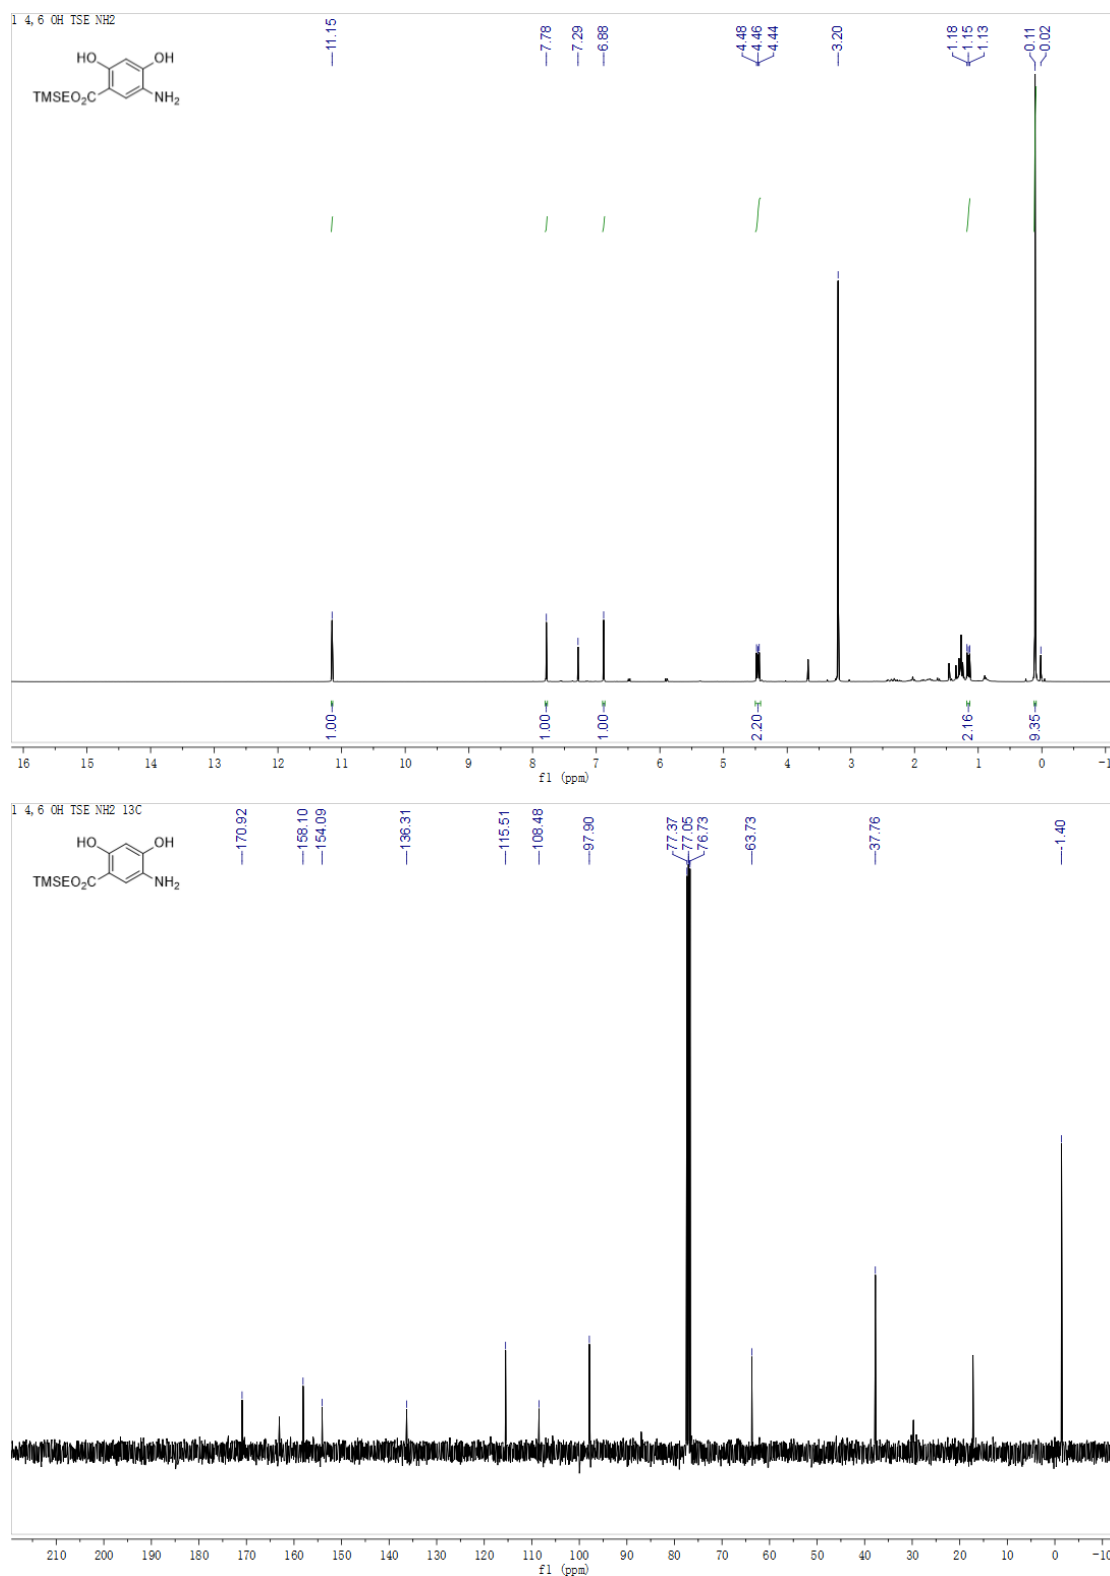

**Figure S37.**  $^1\text{H}$  NMR (400 MHz) and  $^{13}\text{C}$  NMR (101 MHz) spectrum of **24** in  $\text{CDCl}_3$

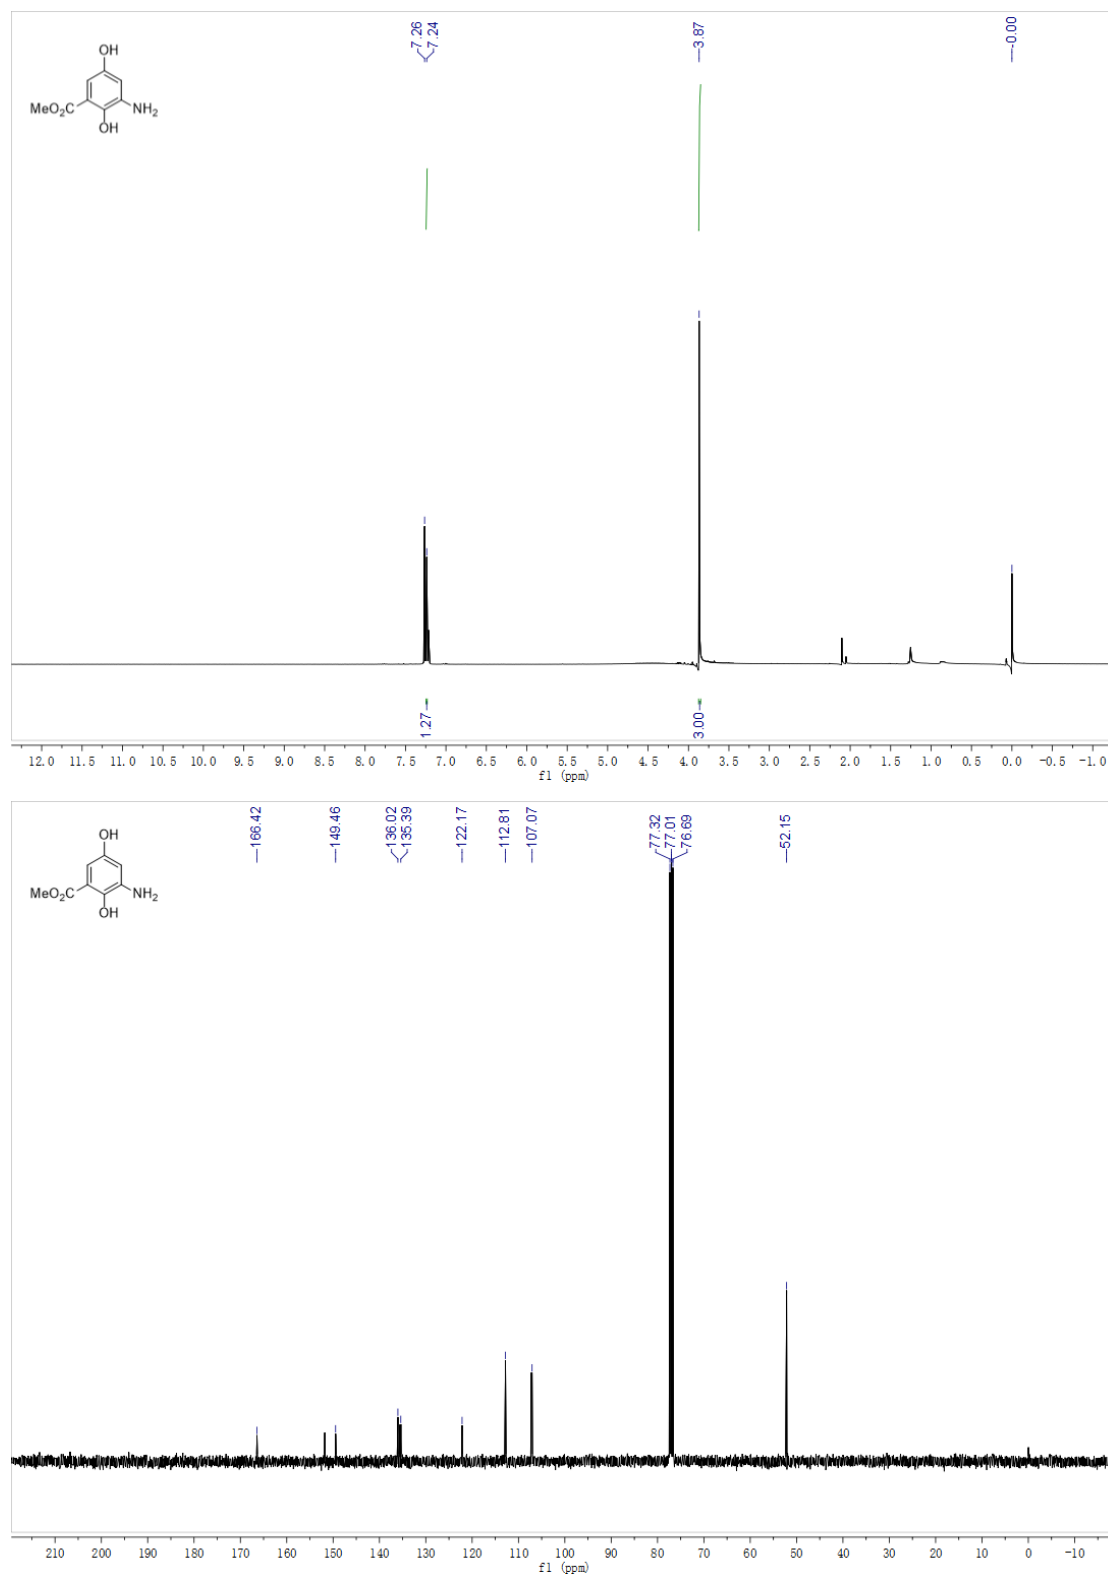

**Figure S38.**  $^1\text{H}$  NMR (400 MHz) and  $^{13}\text{C}$  NMR (101 MHz) spectrum of **12** in  $\text{CDCl}_3$ .

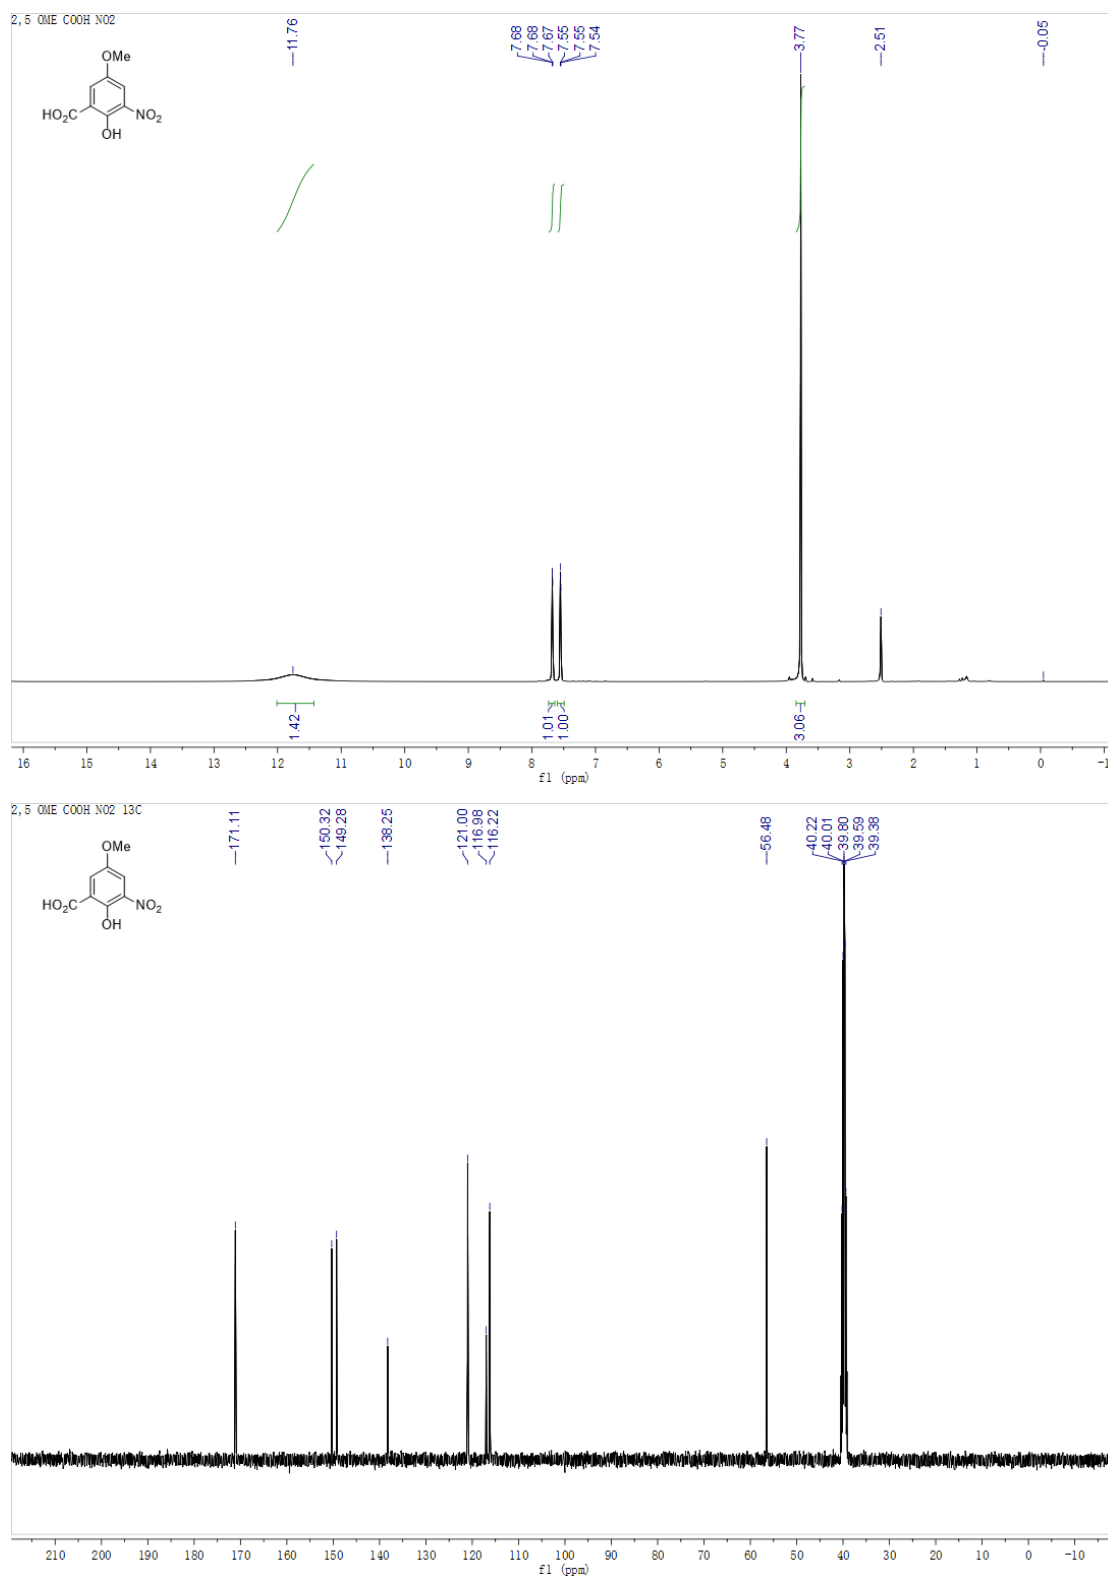

**Figure S39.**  $^1\text{H}$  NMR (400 MHz) and  $^{13}\text{C}$  NMR (101 MHz) spectrum of **14** in  $\text{CDCl}_3$ .

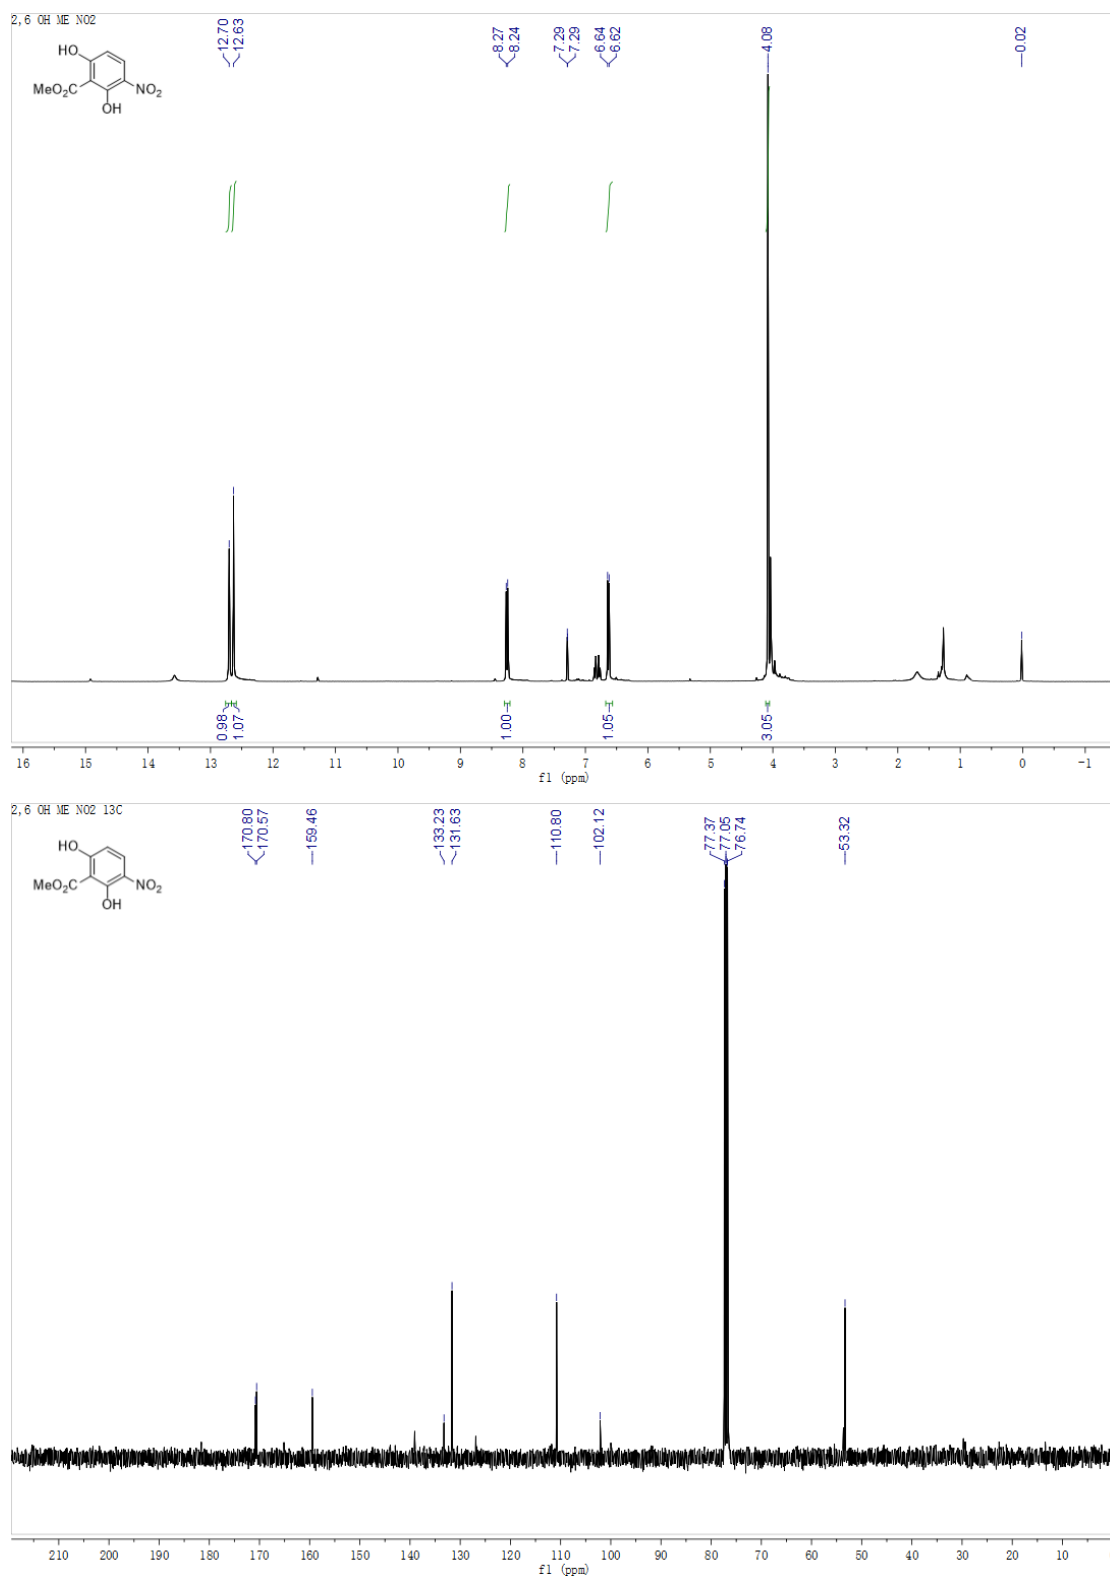

**Figure S40.**  $^1\text{H}$  NMR (500 MHz) and  $^{13}\text{C}$  NMR (126 MHz) spectrum of **23** in  $\text{CDCl}_3$ .

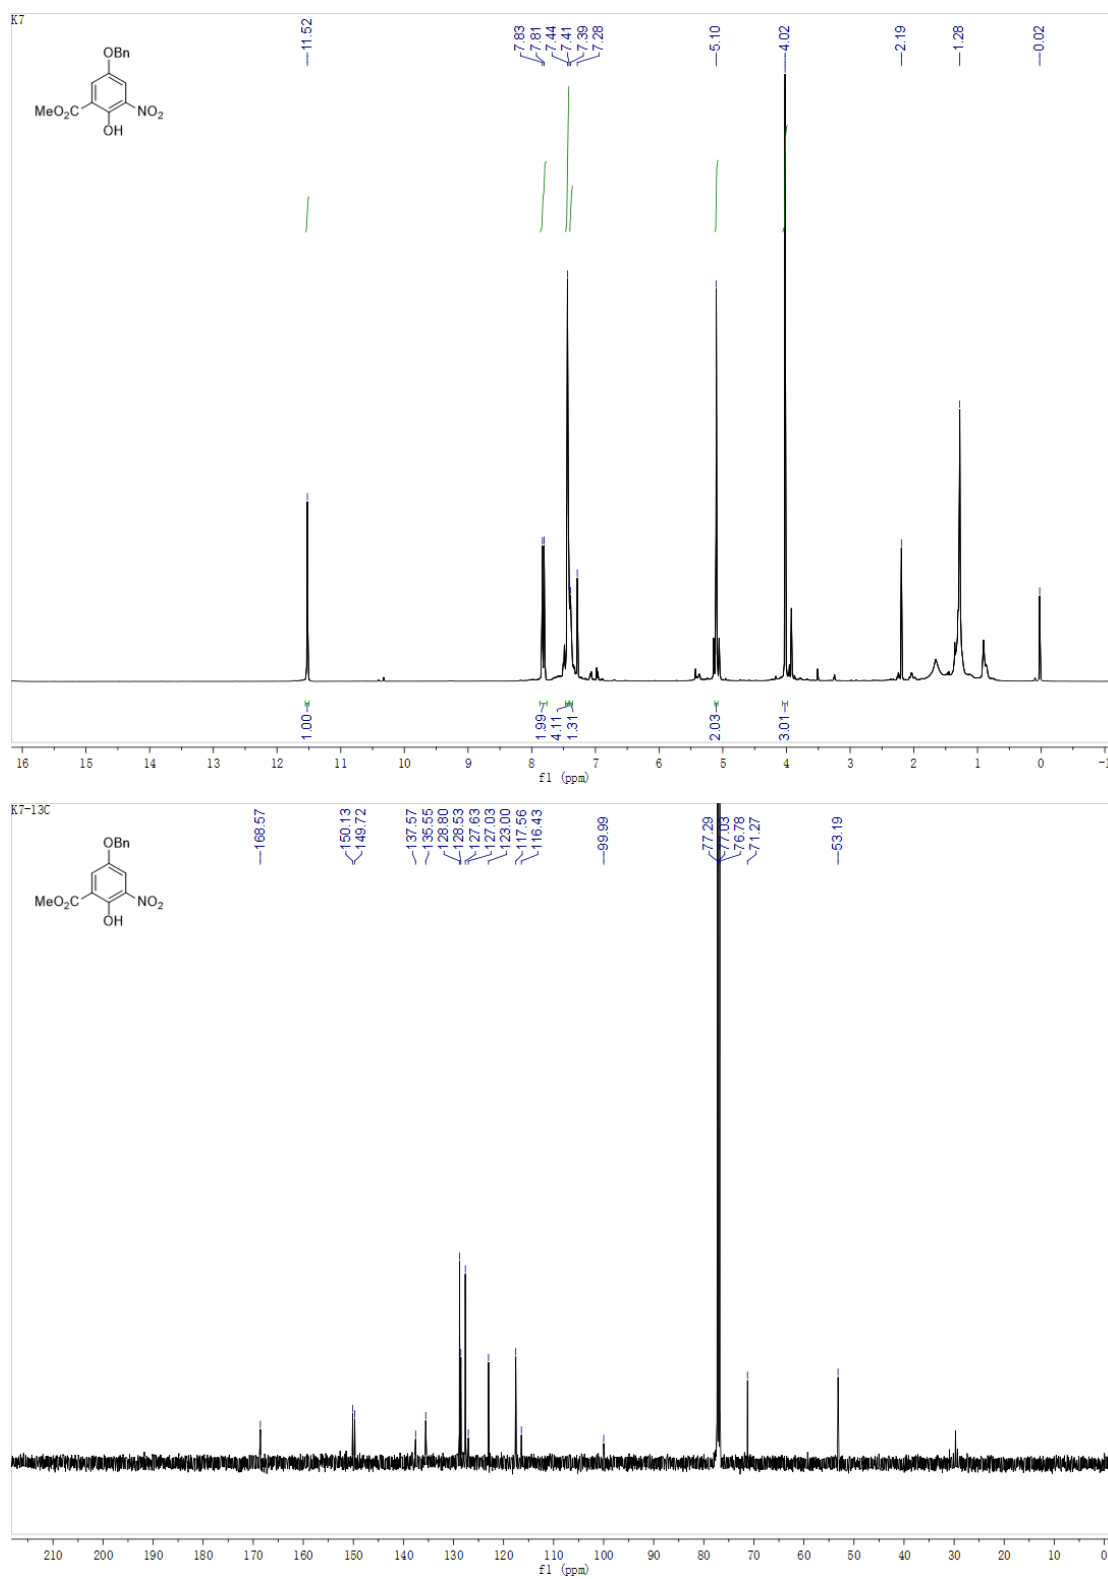

Figure S41.  $^1\text{H}$  NMR (400 MHz) and  $^{13}\text{C}$  NMR (101 MHz) spectrum of **S8** in  $\text{CDCl}_3$ .

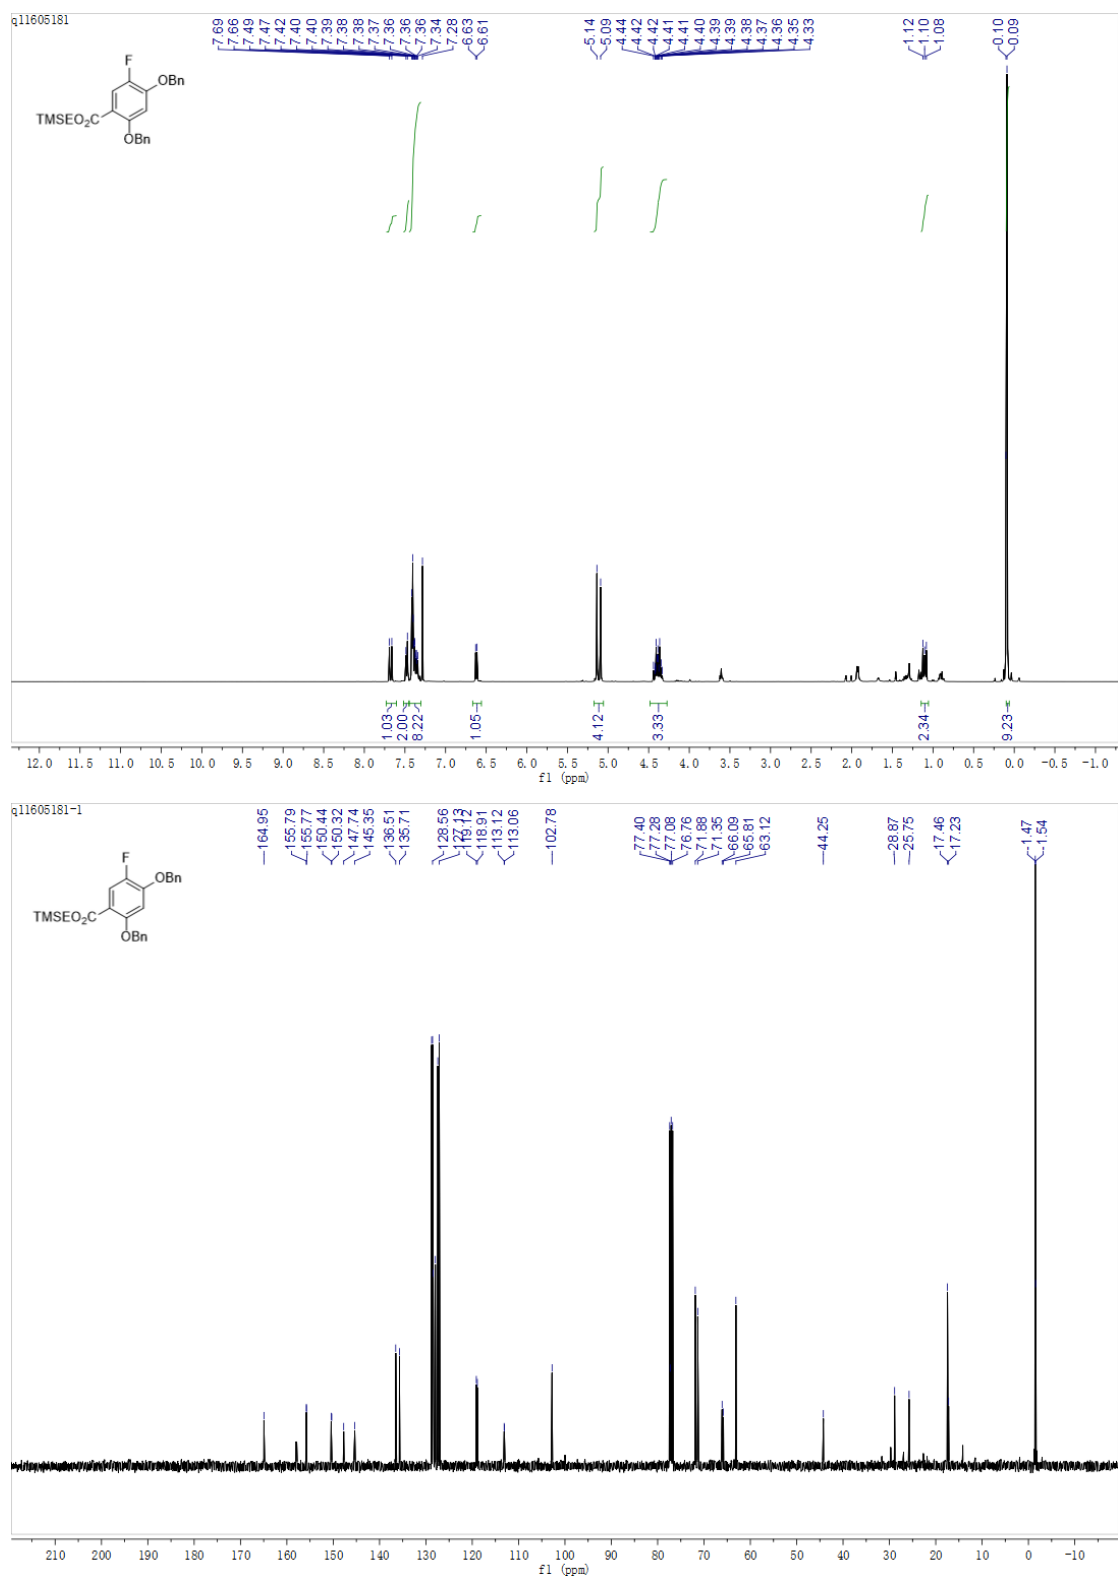



**Figure S42.**  $^1\text{H}$  NMR (400 MHz) and  $^{13}\text{C}$  NMR (101 MHz) spectrum of **S10** in  $\text{CDCl}_3$ .

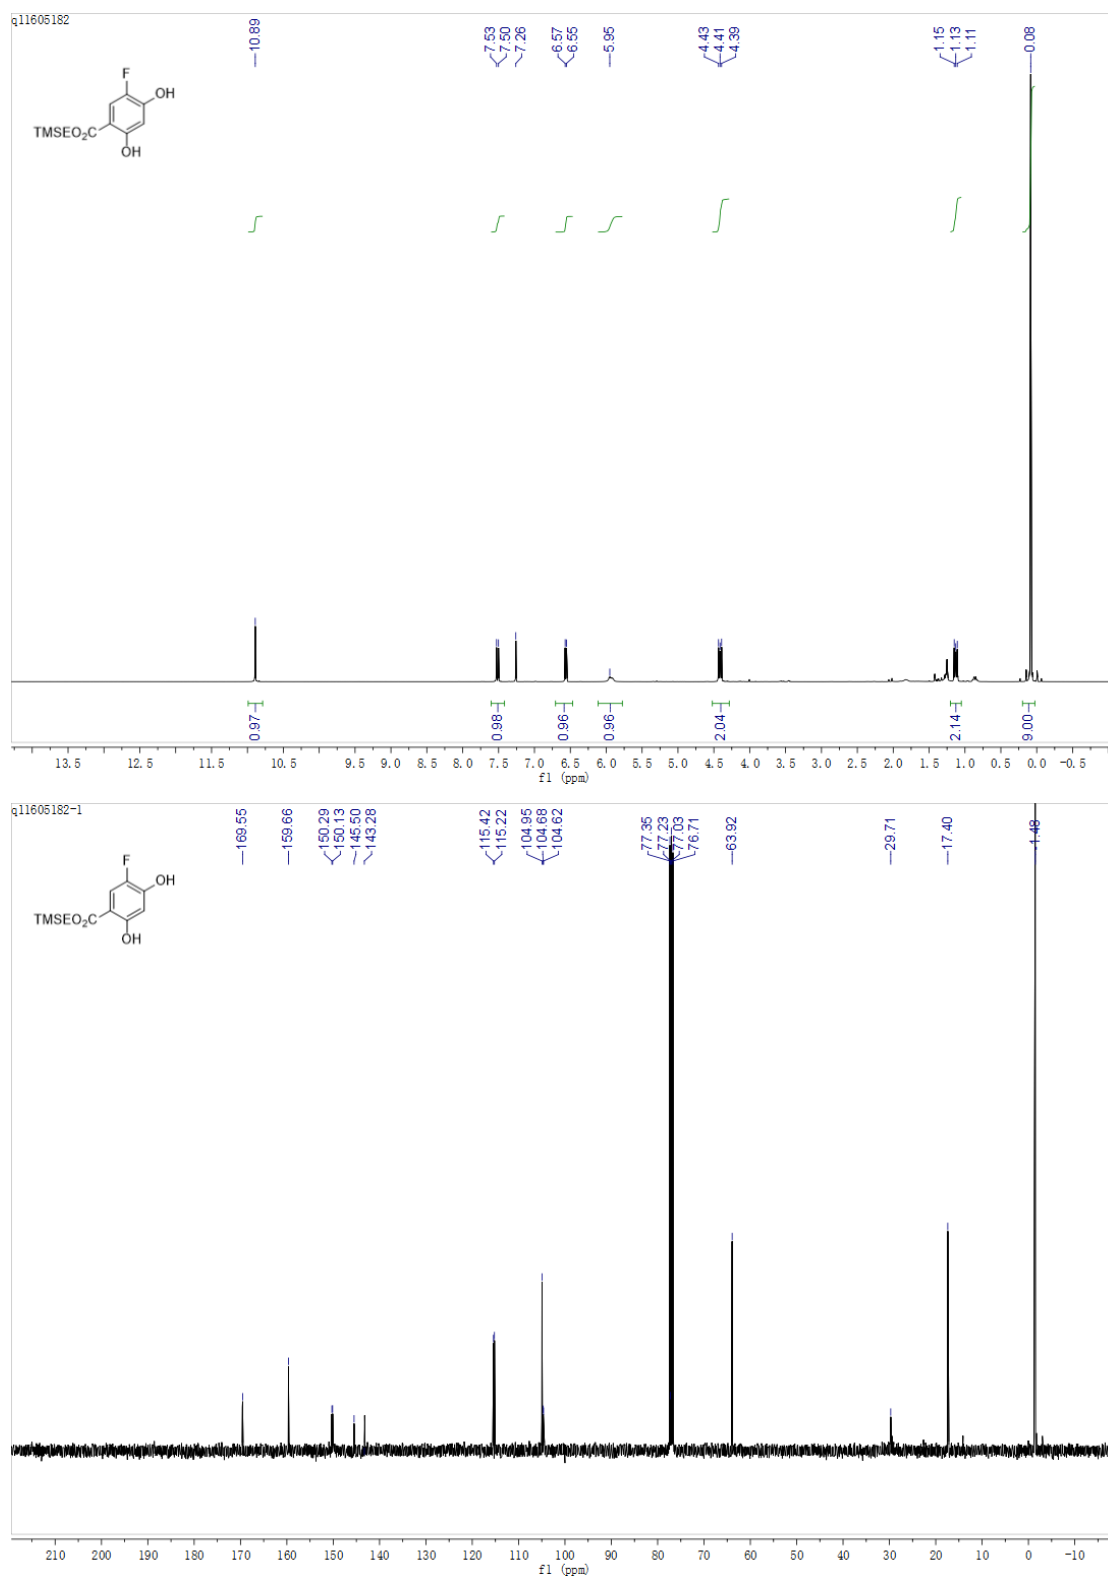

**Figure S43.**  $^1\text{H}$  NMR (400 MHz) and  $^{13}\text{C}$  NMR (101 MHz) spectrum of **S11** in  $\text{CDCl}_3$ .

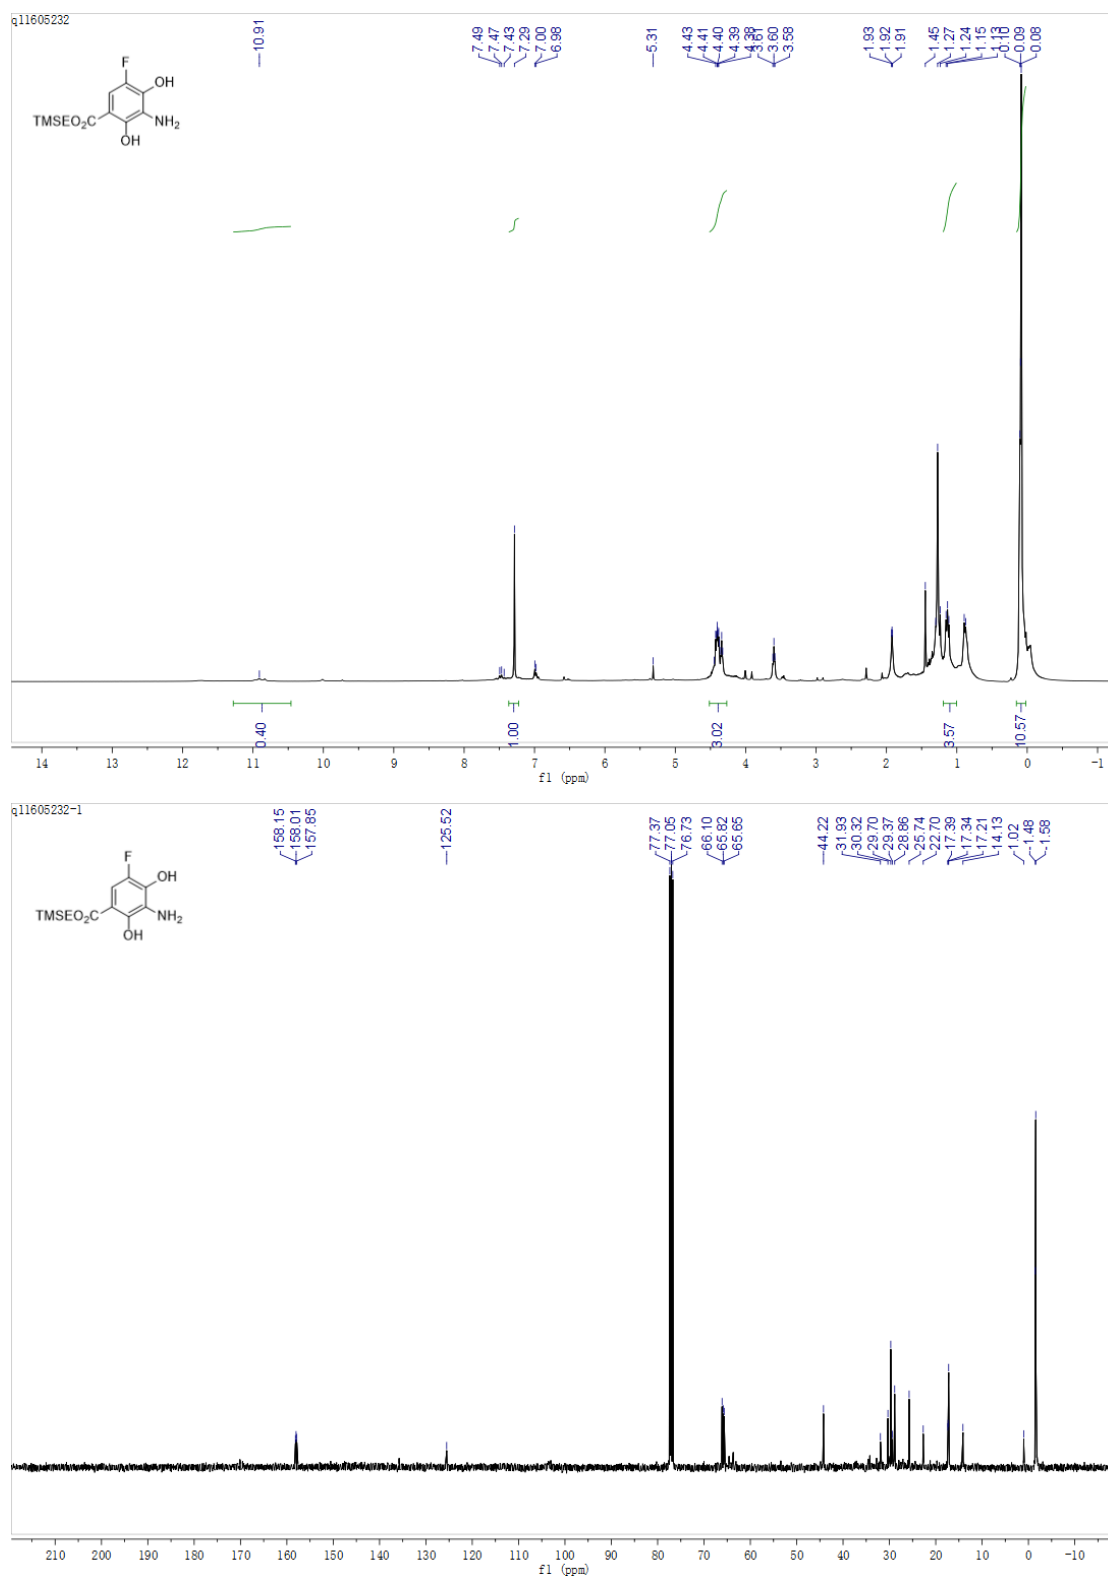

**Figure S44.**  $^1\text{H}$  NMR (400 MHz) and  $^{13}\text{C}$  NMR (126 MHz) spectrum of **18** in MeOD.

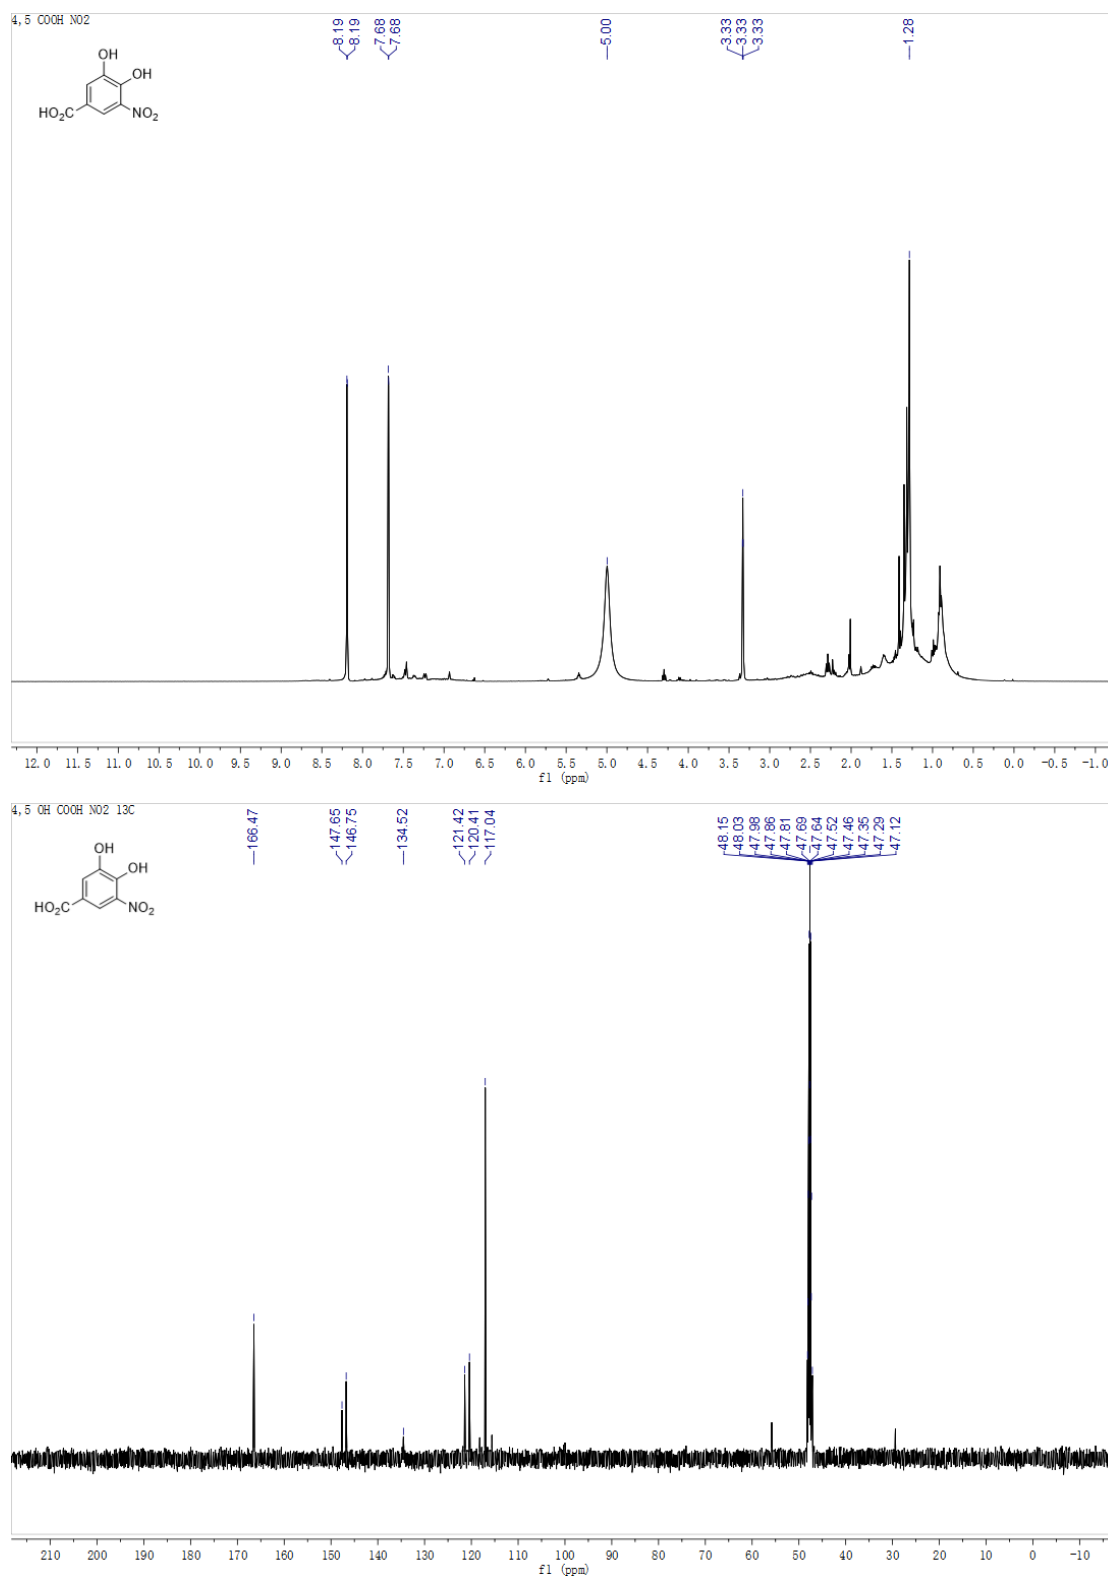

**Figure S45.**  $^1\text{H}$  NMR (400 MHz) and  $^{13}\text{C}$  NMR (101 MHz) spectrum of **S13** in  $\text{CDCl}_3$ .

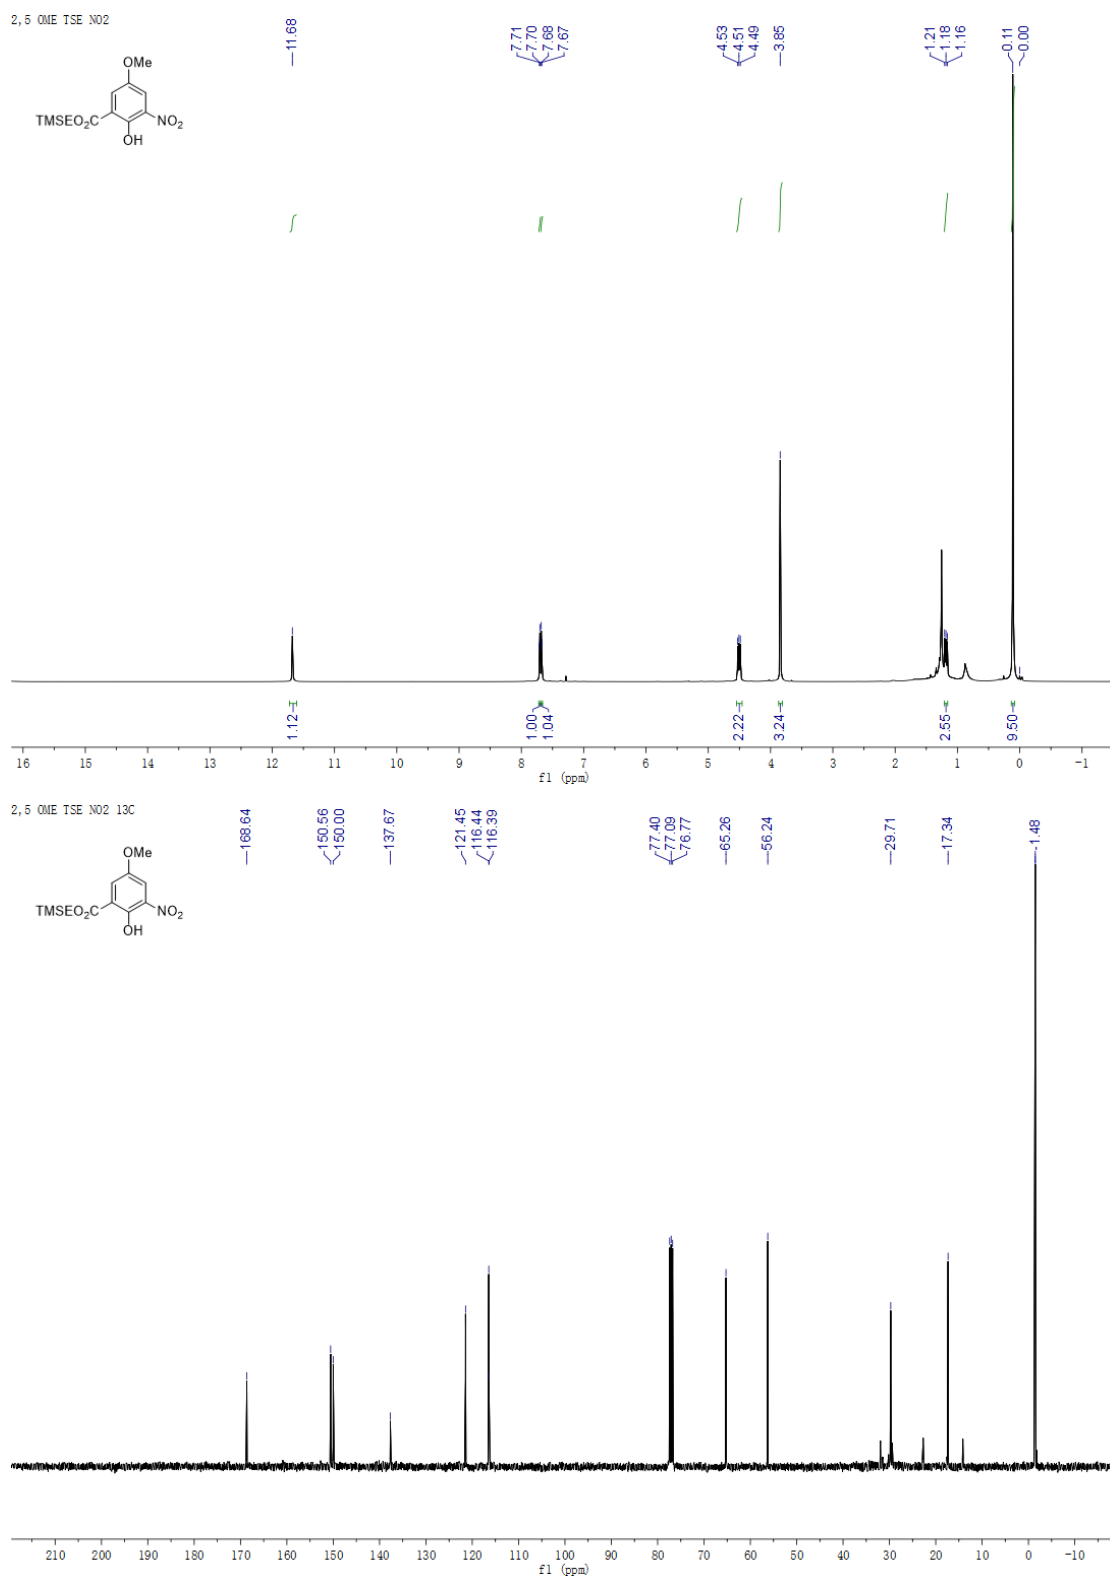

**Figure S46.**  $^1\text{H}$  NMR (400 MHz) and  $^{13}\text{C}$  NMR (101 MHz) spectrum of **S15** in  $\text{DMSO-}d_6$

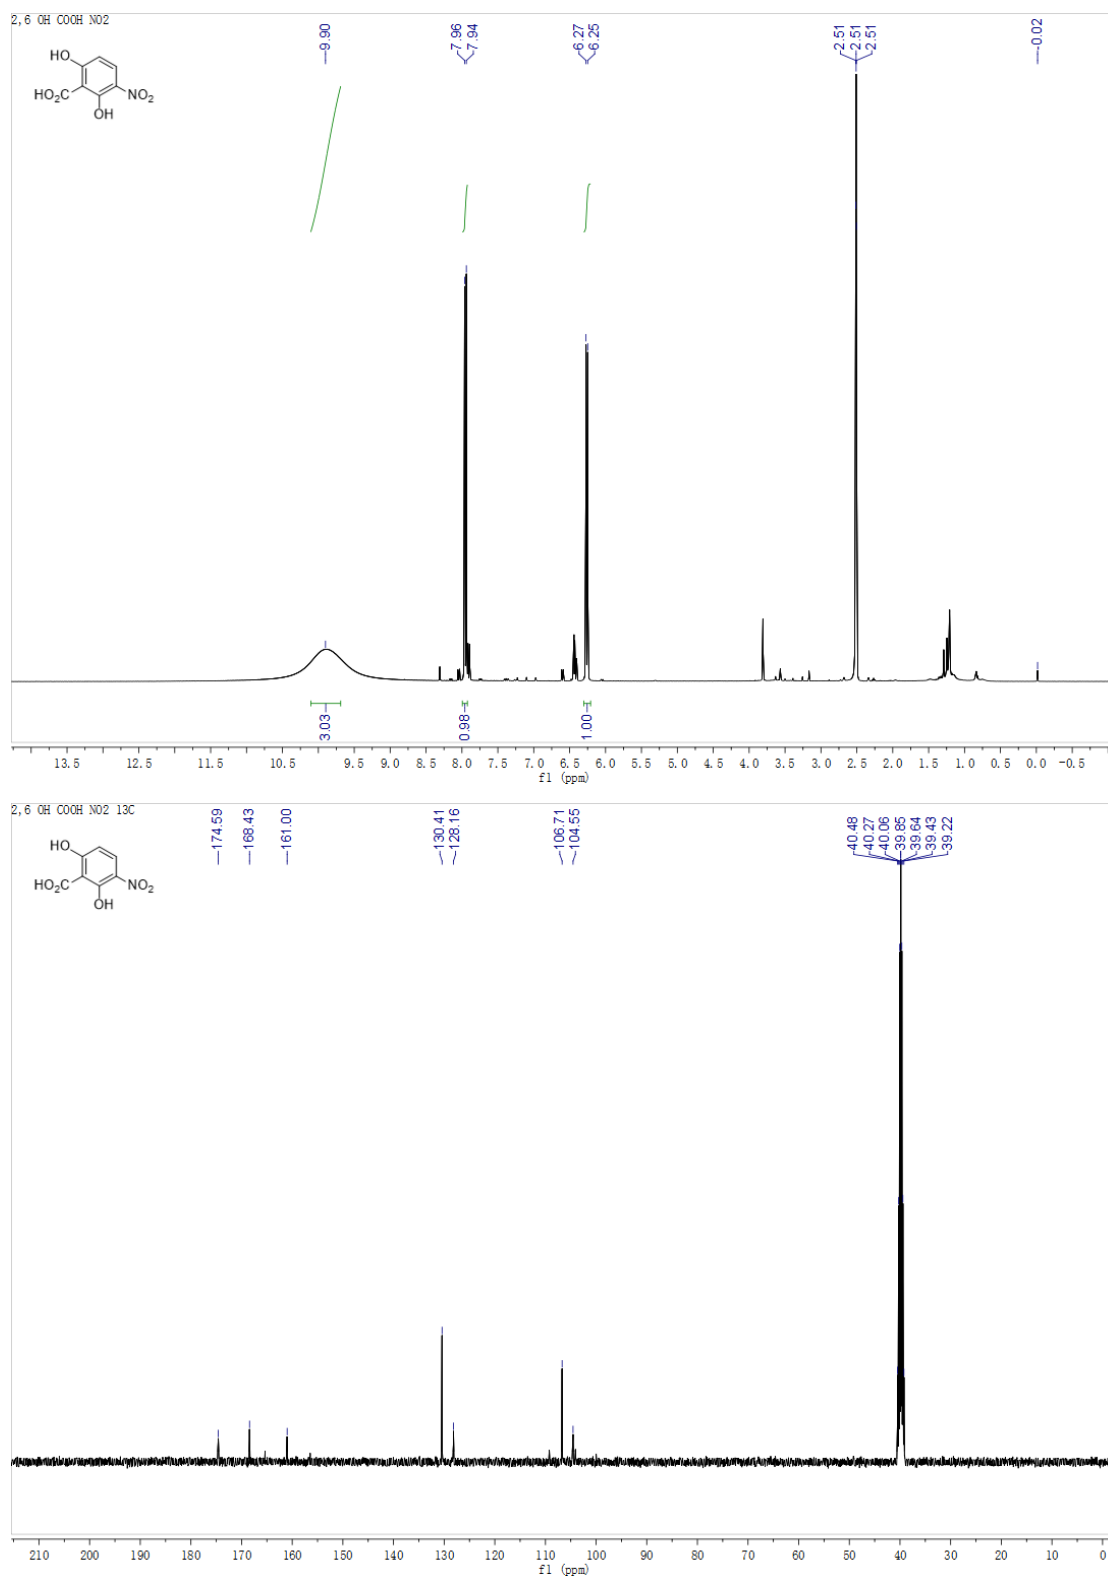

**Figure S47.**  $^1\text{H}$  NMR (400 MHz) and  $^{13}\text{C}$  NMR (101 MHz) spectrum of **S18** in  $\text{CDCl}_3$ .

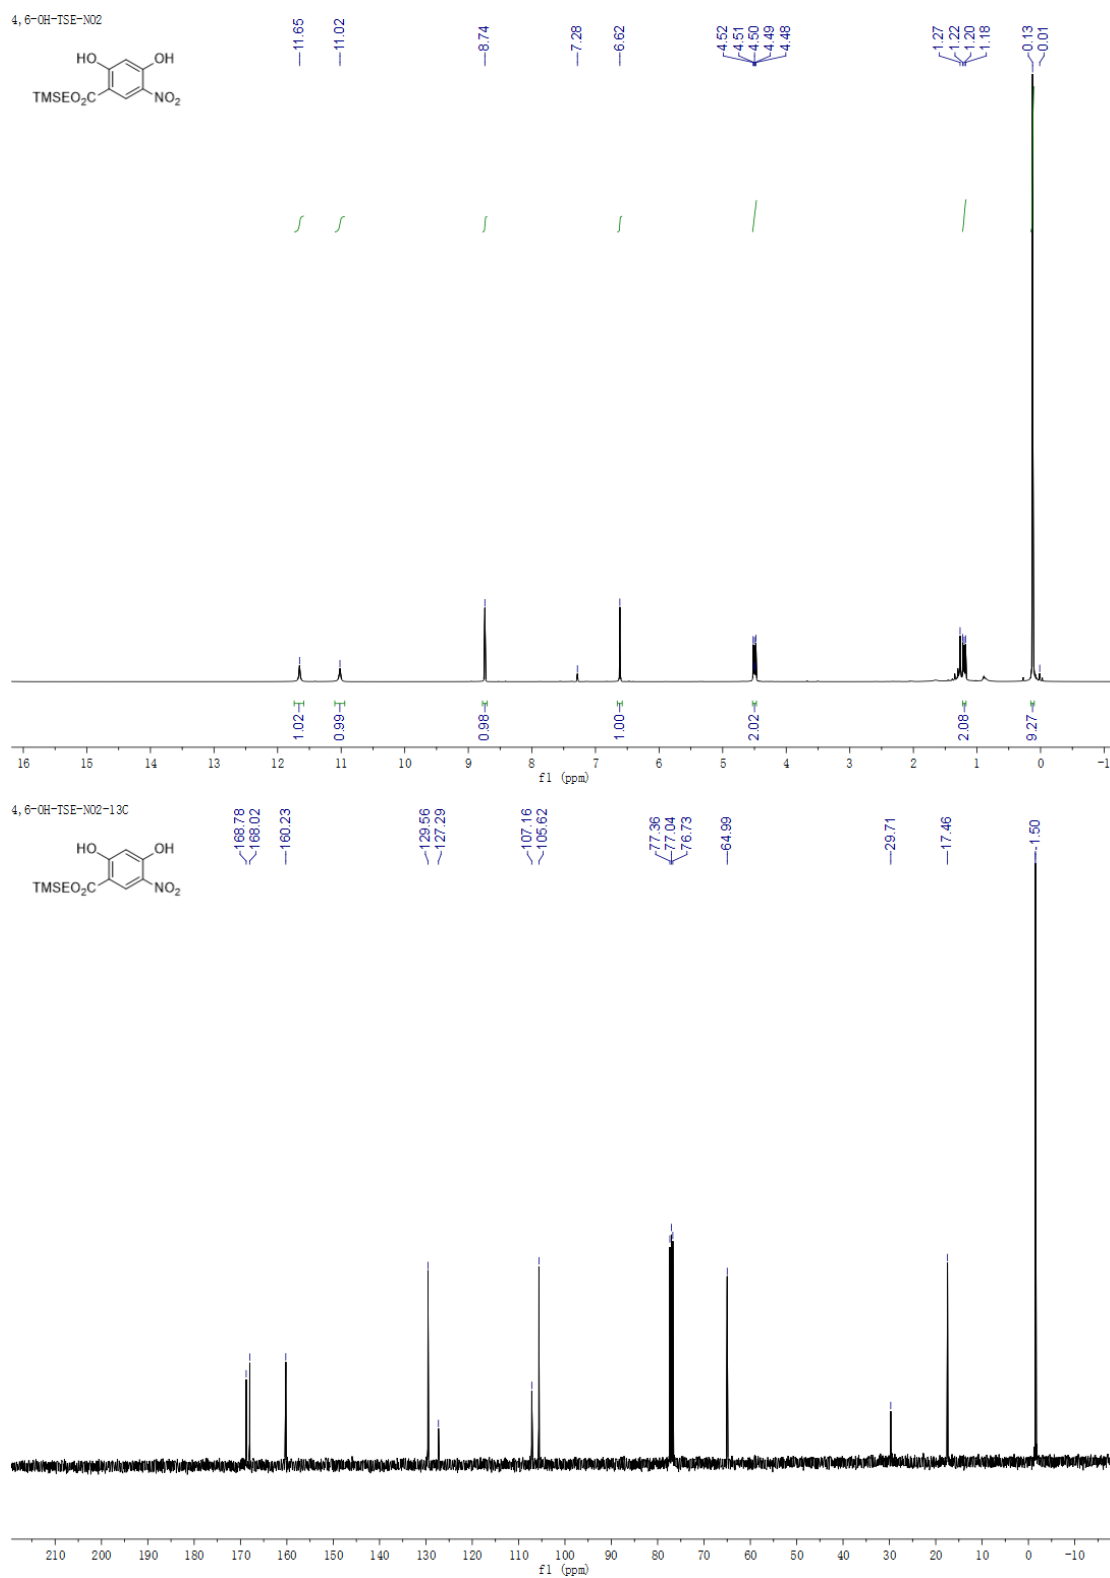

**Figure S48.**  $^1\text{H}$  NMR (400 MHz) and  $^{13}\text{C}$  NMR (101 MHz) spectrum of **s-4f** in MeOD.

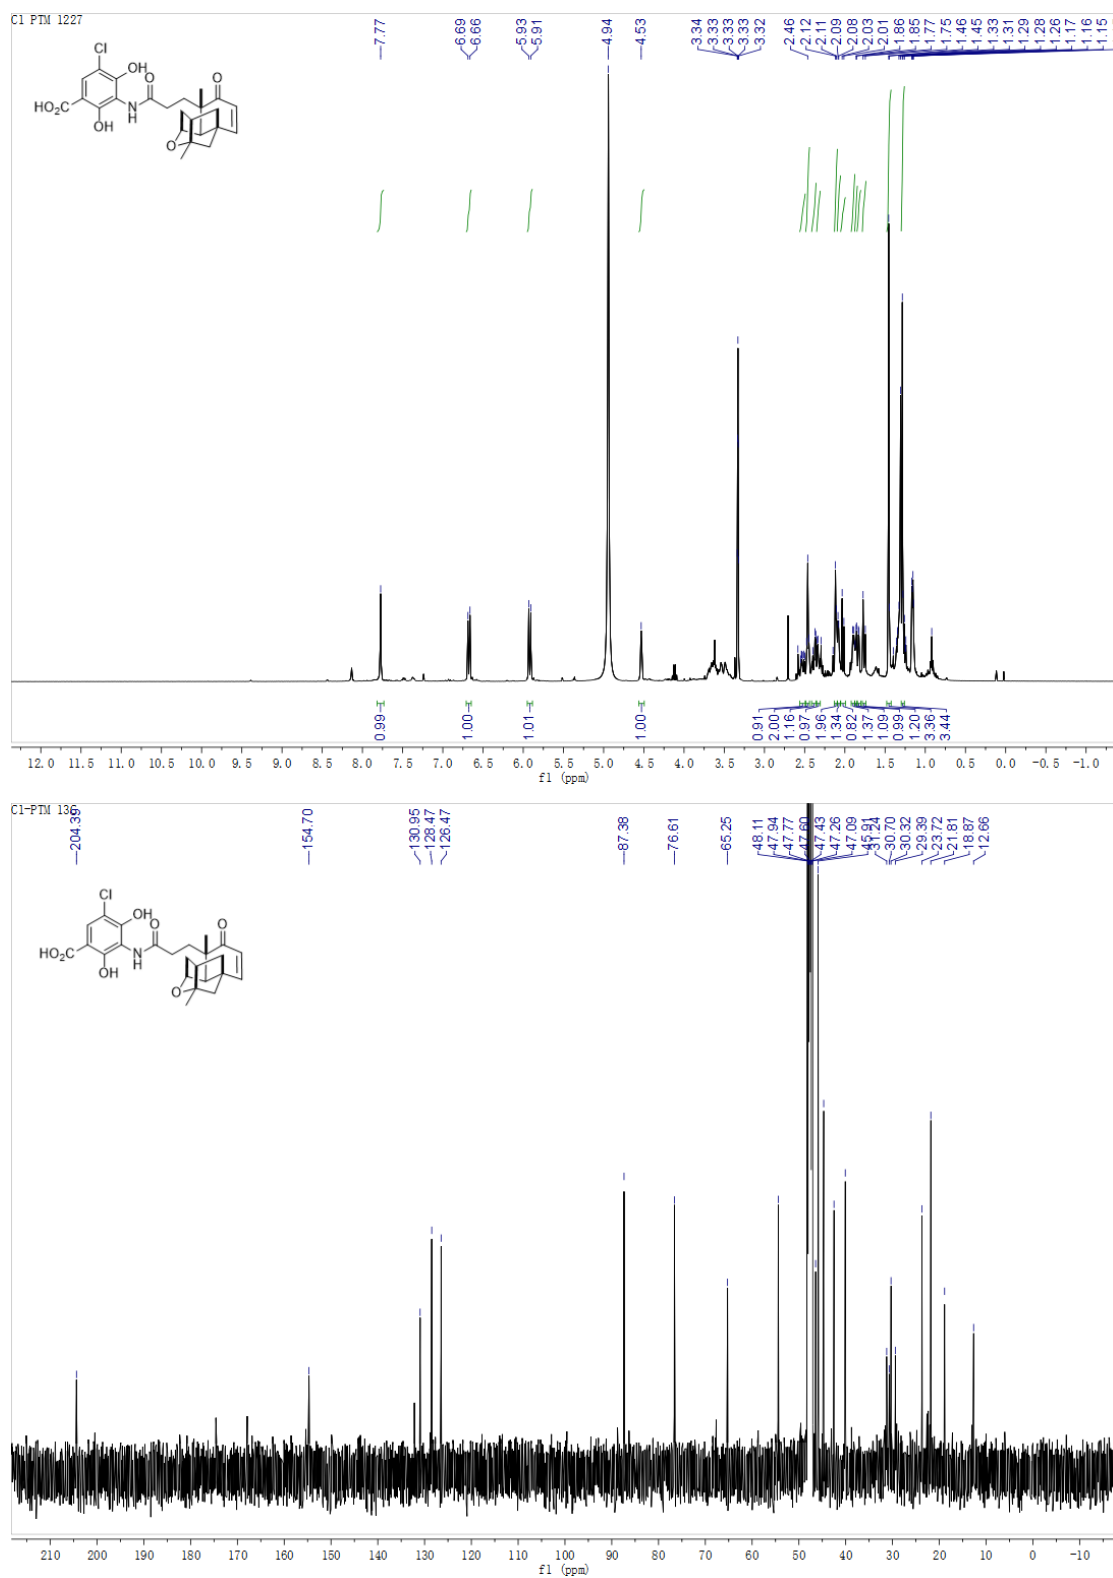

**Figure S49.**  $^1\text{H}$ - $^{13}\text{C}$  HSQC spectrum of **s-4f** in MeOD

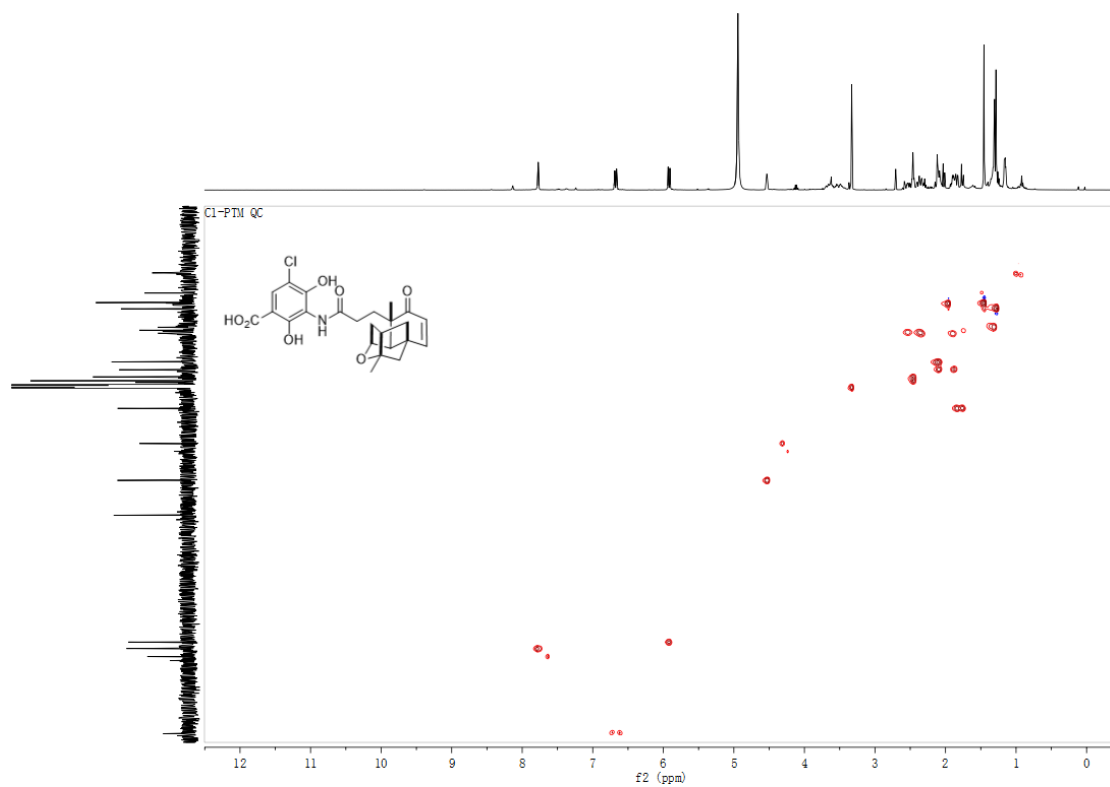



**Figure S50.**  $^1\text{H}$  NMR (400 MHz) and  $^{13}\text{C}$  NMR (101 MHz) spectrum of **s-4h** in MeOD.

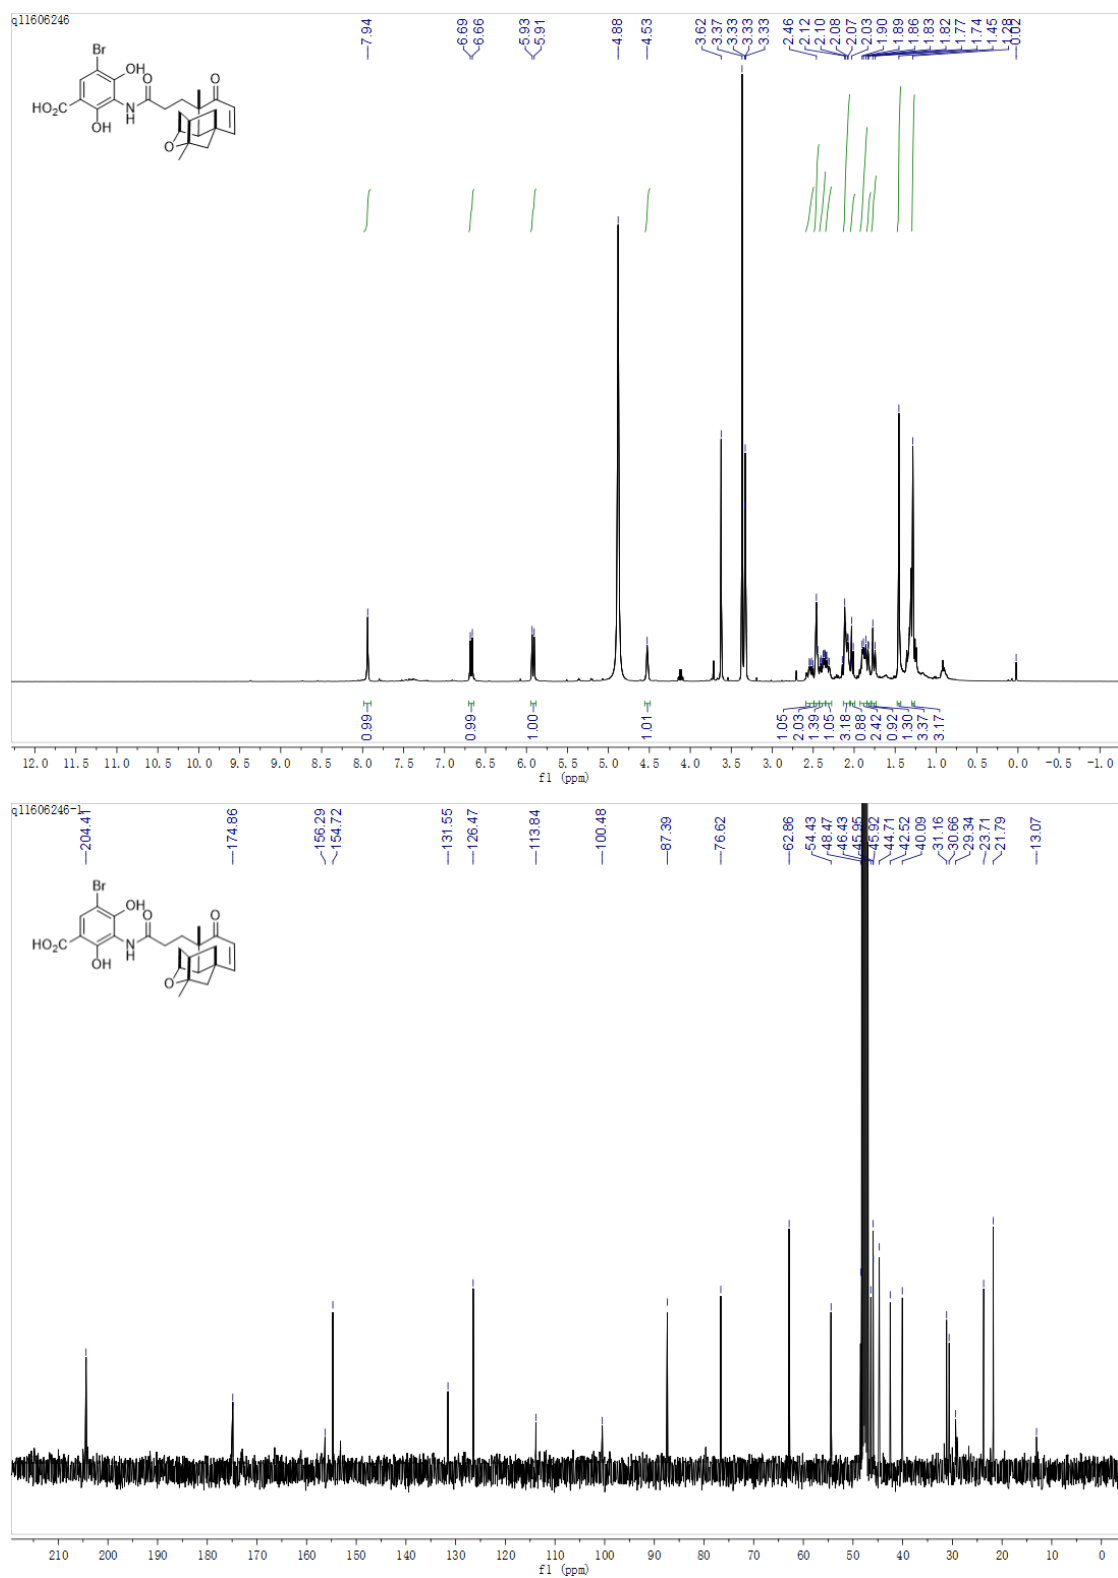

**Figure S51.**  $^1\text{H}$ - $^{13}\text{C}$  HSQC spectrum of **s-4h** in MeOD

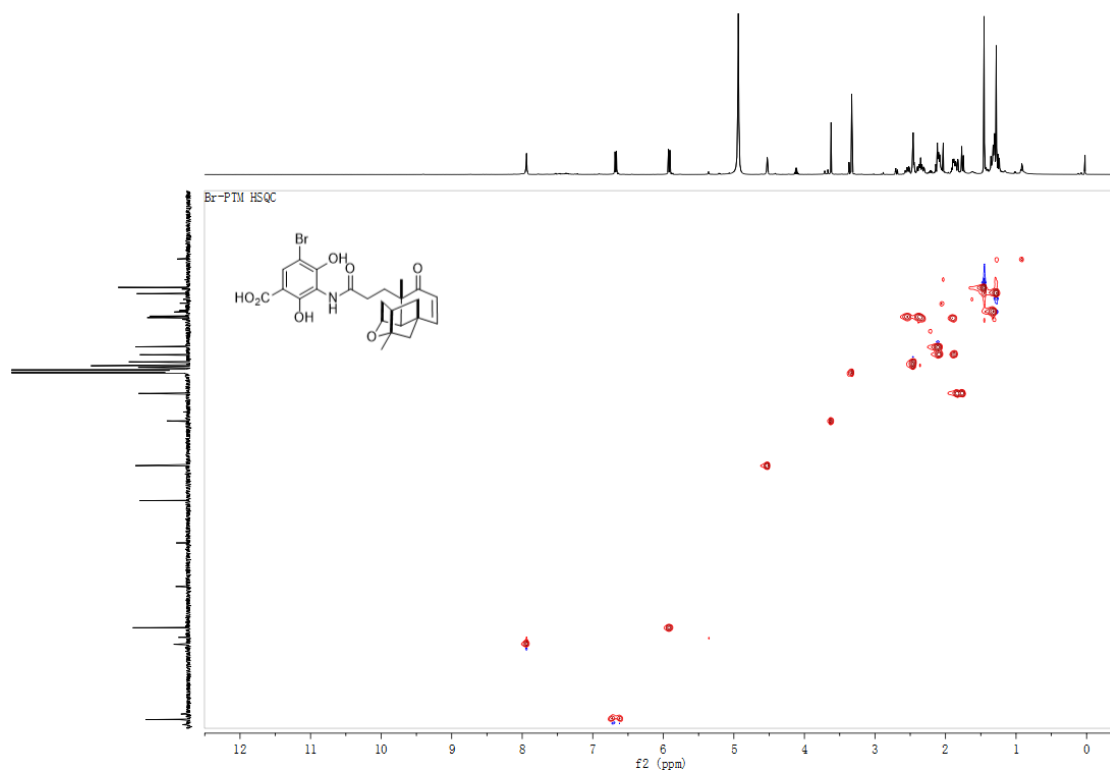

**Figure S52.** HRMS spectrum of **7a**

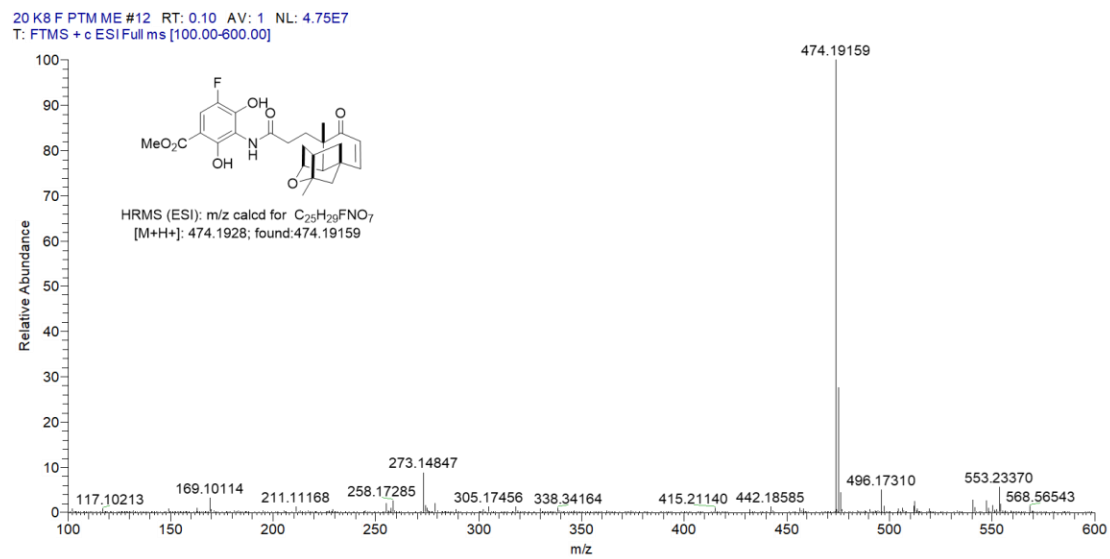

**Figure S53.** HRMS spectrum of **7b**

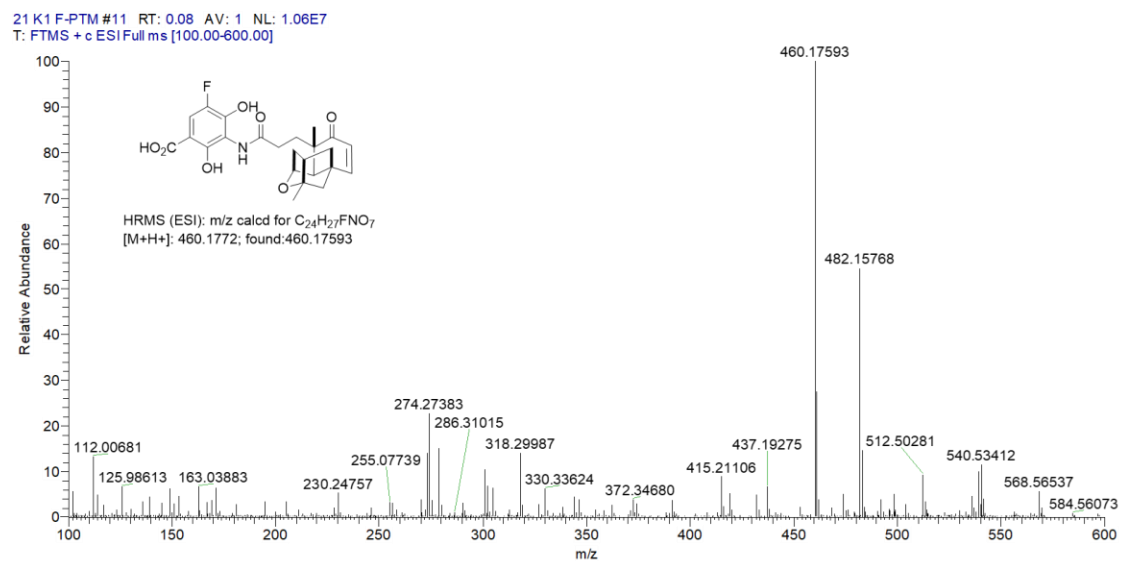

**Figure S54.** HRMS spectrum of **8**

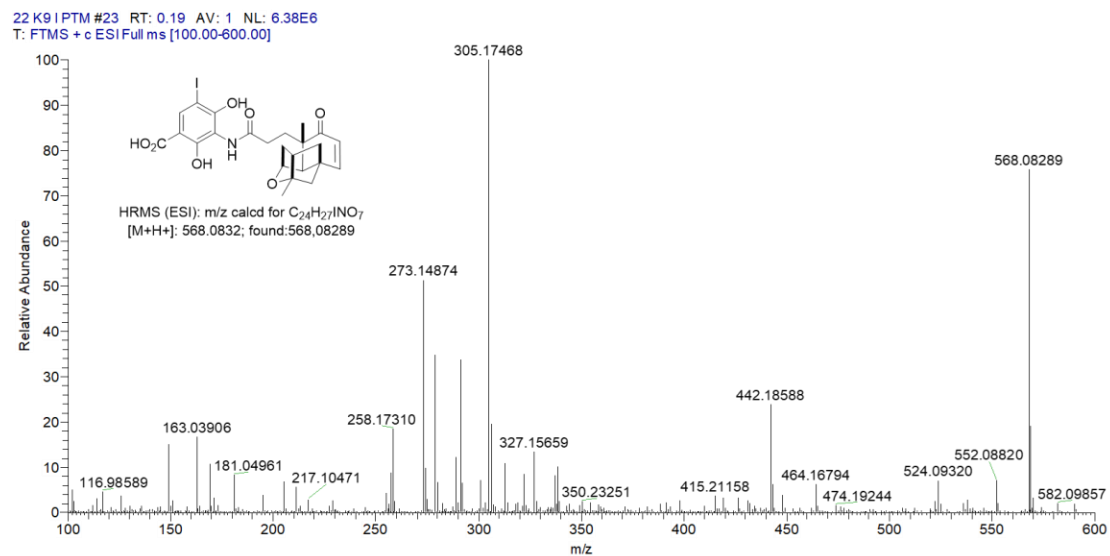

**Figure S55.** HRMS spectrum of **9**

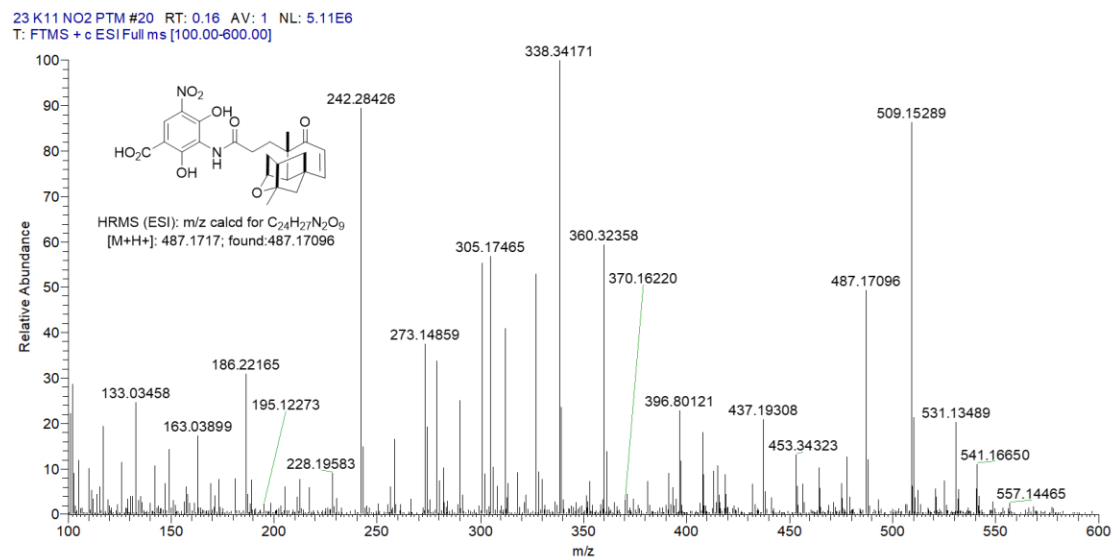

**Figure S56.** HRMS spectrum of **10a**

24 K5 HCHO PTM+14 #13 RT: 0.11 AV: 1 NL: 2.12E7  
T: FTMS + c ESI Full ms [100.00-600.00]

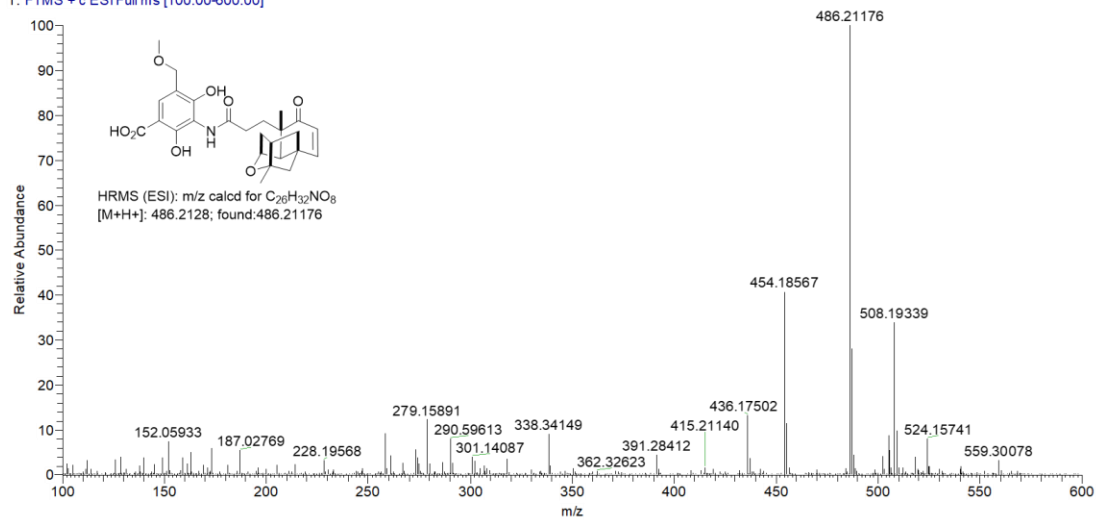

**Figure S57.** HRMS spectrum of **10b**

25 K36 HCHO PTM 471 #27 RT: 0.23 AV: 1 NL: 2.66E6  
T: FTMS + c ESI Full ms [100.00-600.00]

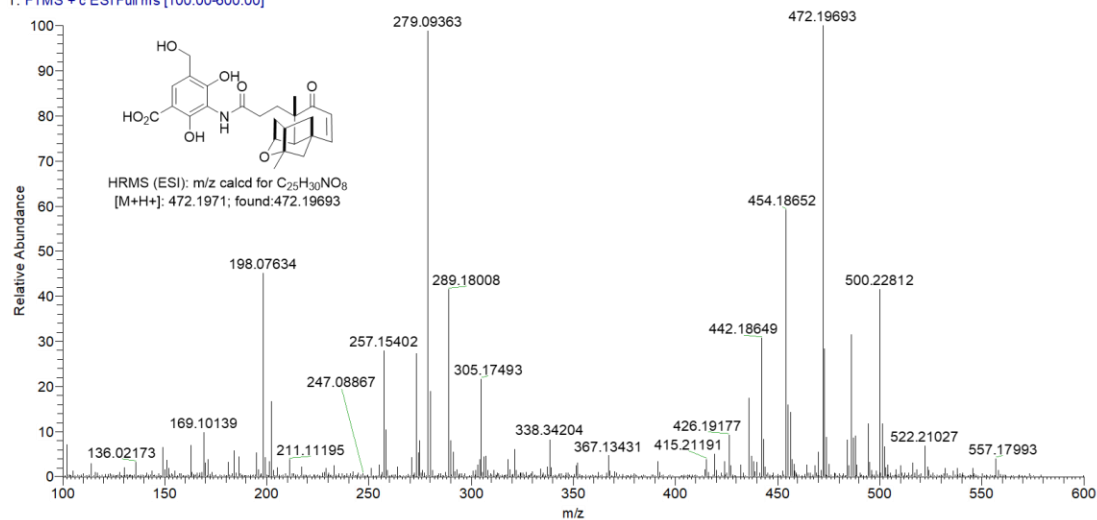

**Figure S58.** HRMS spectrum of **25a**

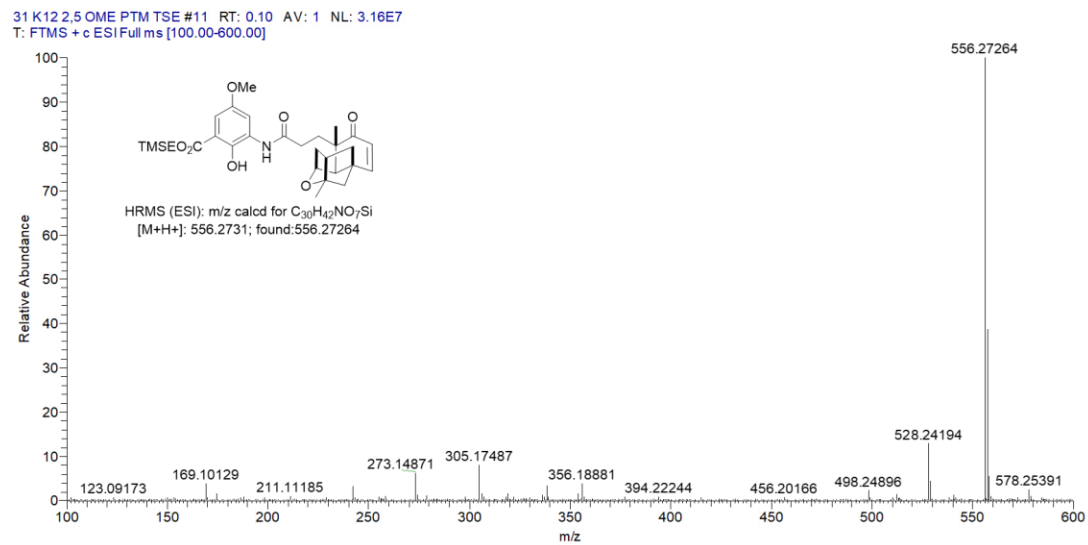

**Figure S59.** HRMS spectrum of **26a**

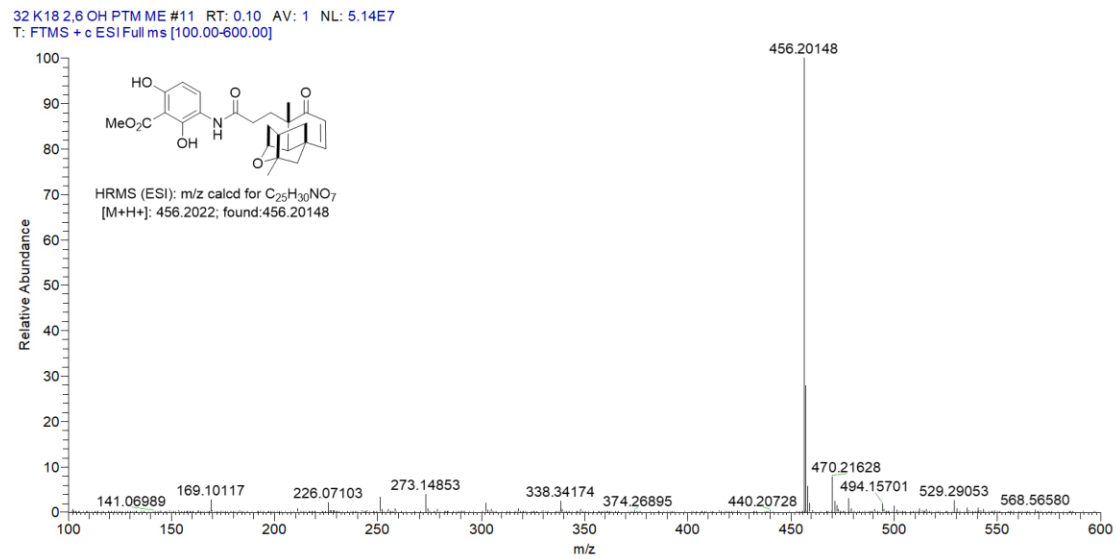

**Figure S60.** HRMS spectrum of **26b**

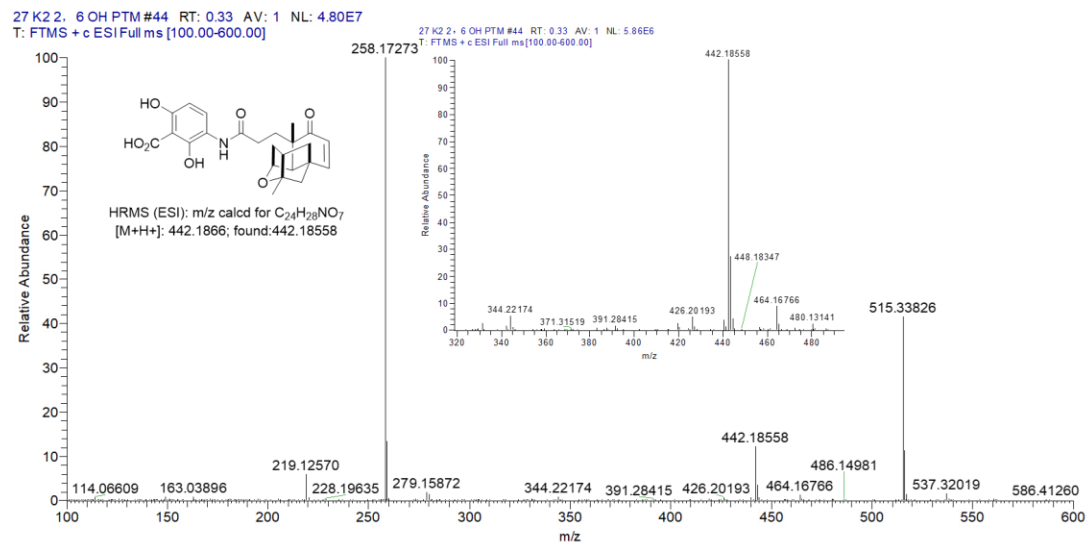

**Figure S61.** HRMS spectrum of **27a**

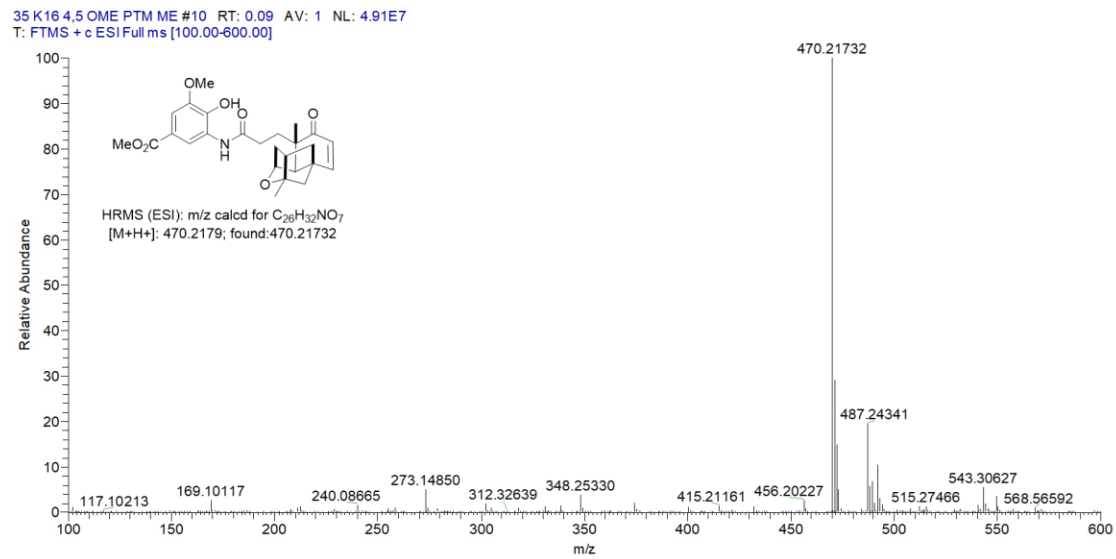

**Figure S62.** HRMS spectrum of **27b**

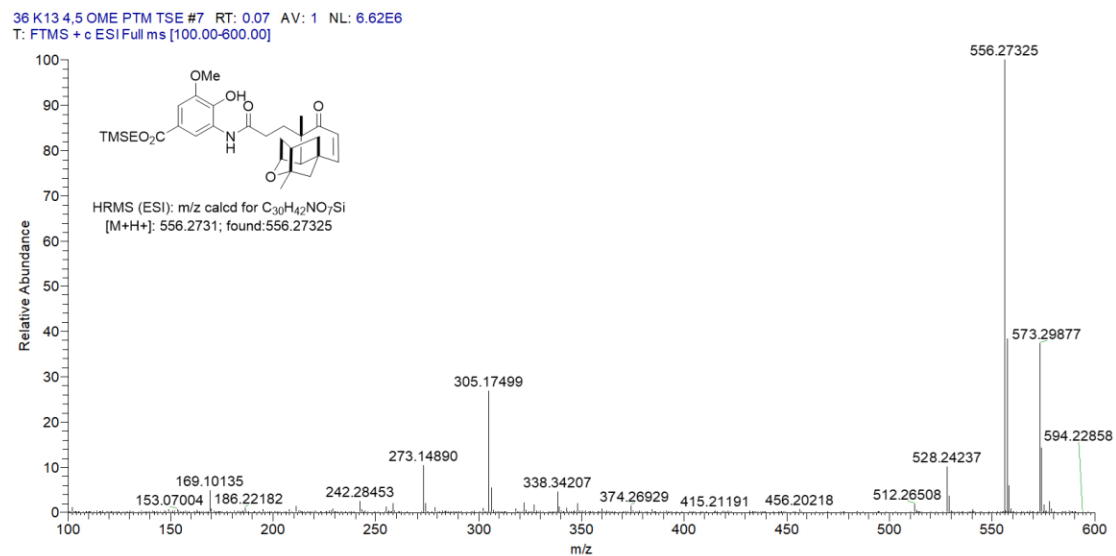

**Figure S63.** HRMS spectrum of **28**

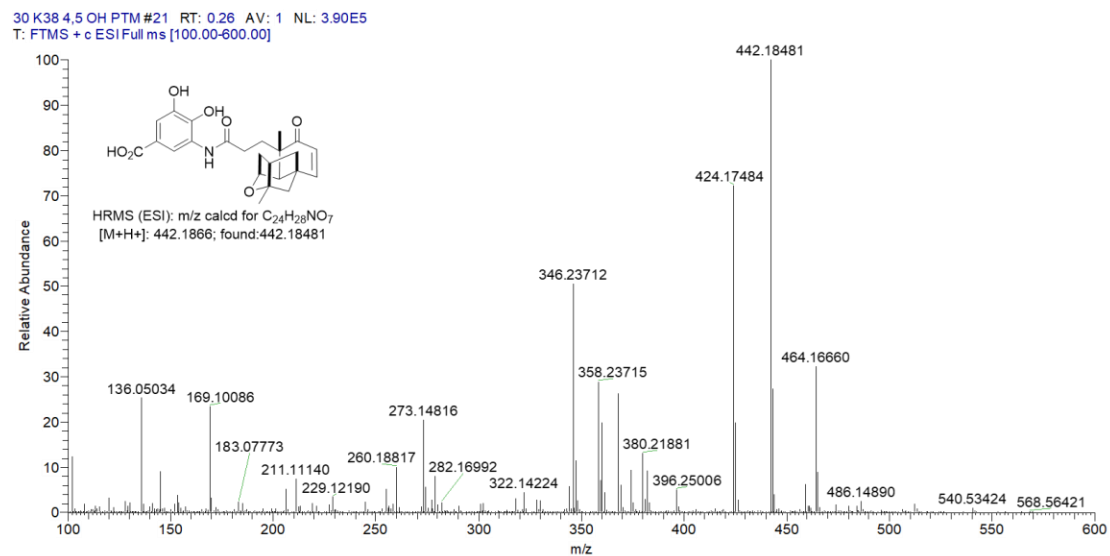



**Figure S64.** HRMS spectrum of **29a**

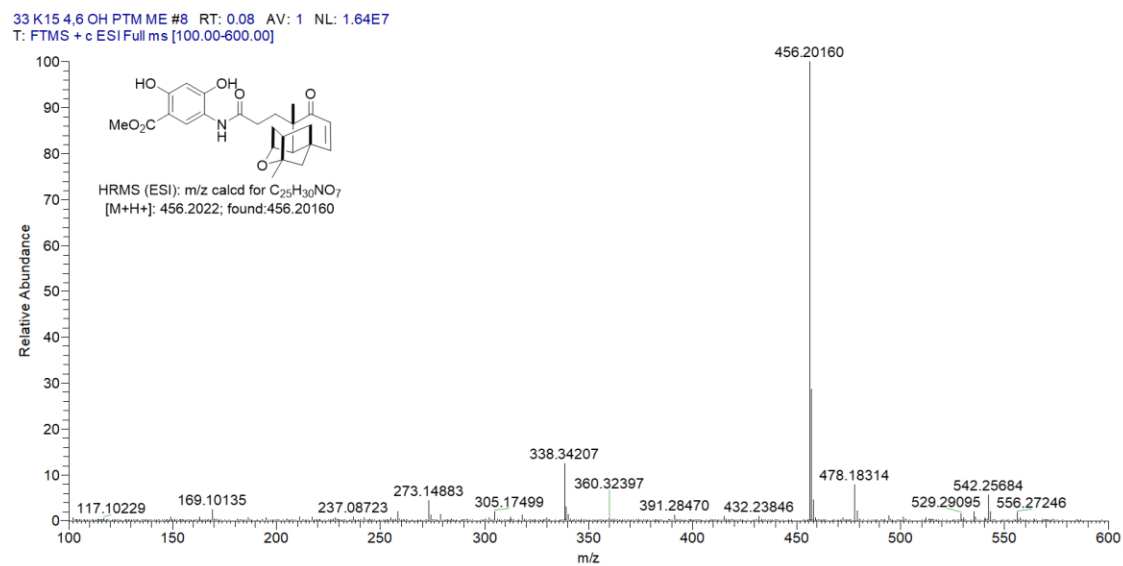

**Figure S65.** HRMS spectrum of **30**

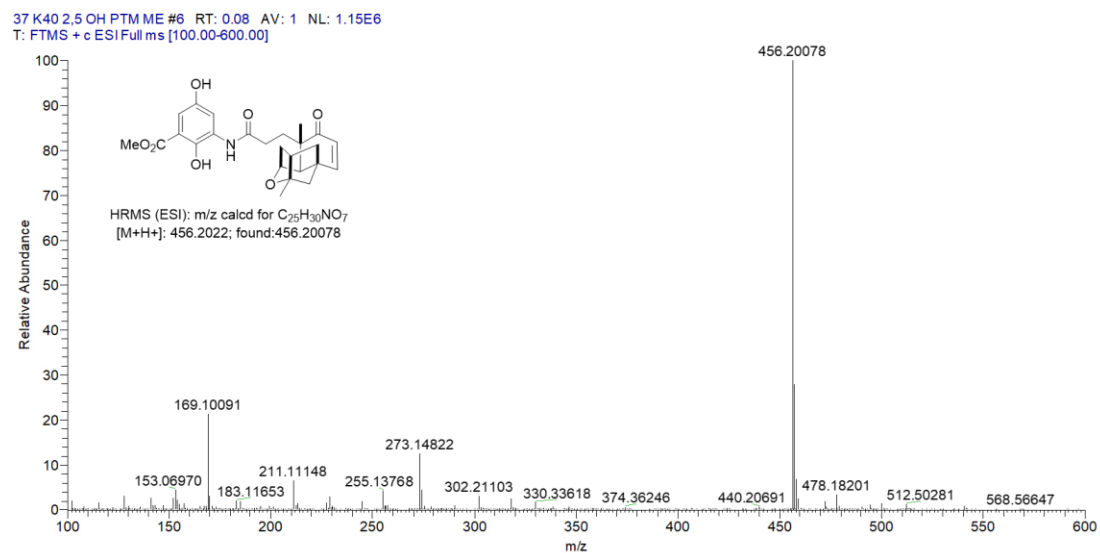

**Figure S66.** HRMS spectrum of **29b**

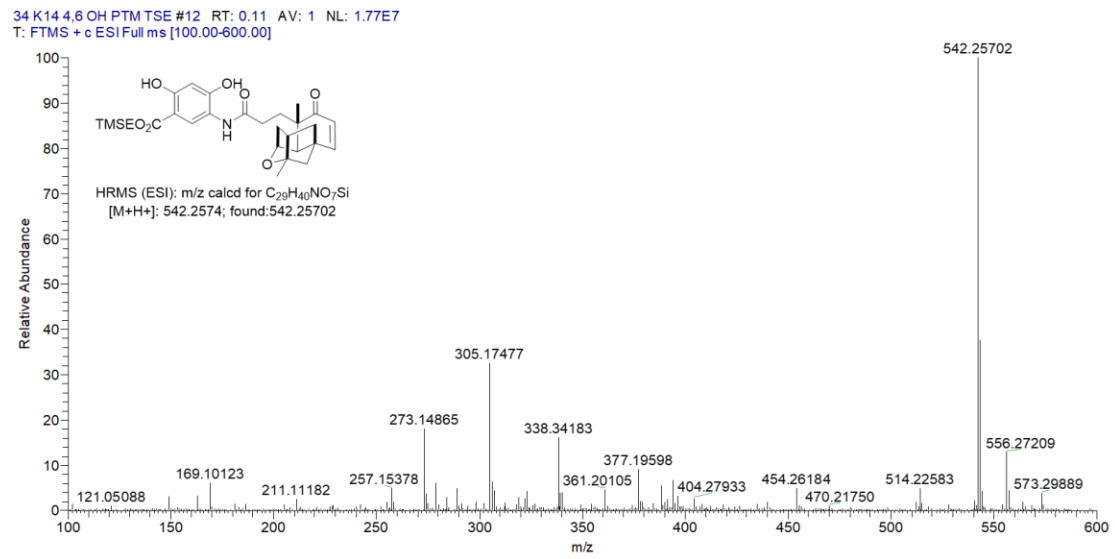

**Figure S67.** HRMS spectrum of **25b**

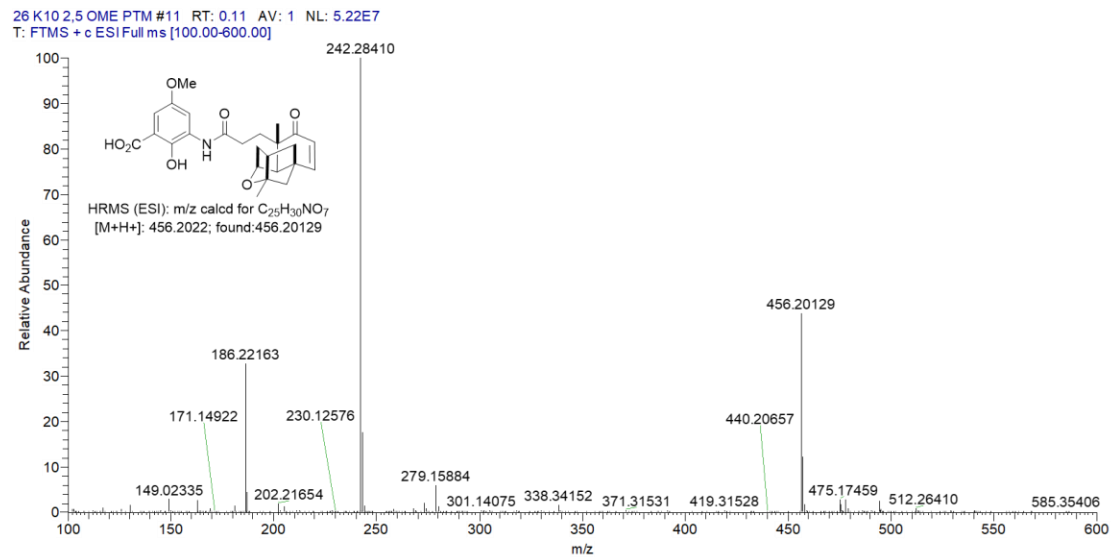

**Figure S68.** HRMS spectrum of **27c**

29 K6 4,5 OMe PTM #9 RT: 0.07 AV: 1 NL: 3.30E7  
T: FTMS + c ESI Full ms [100.00-600.00]

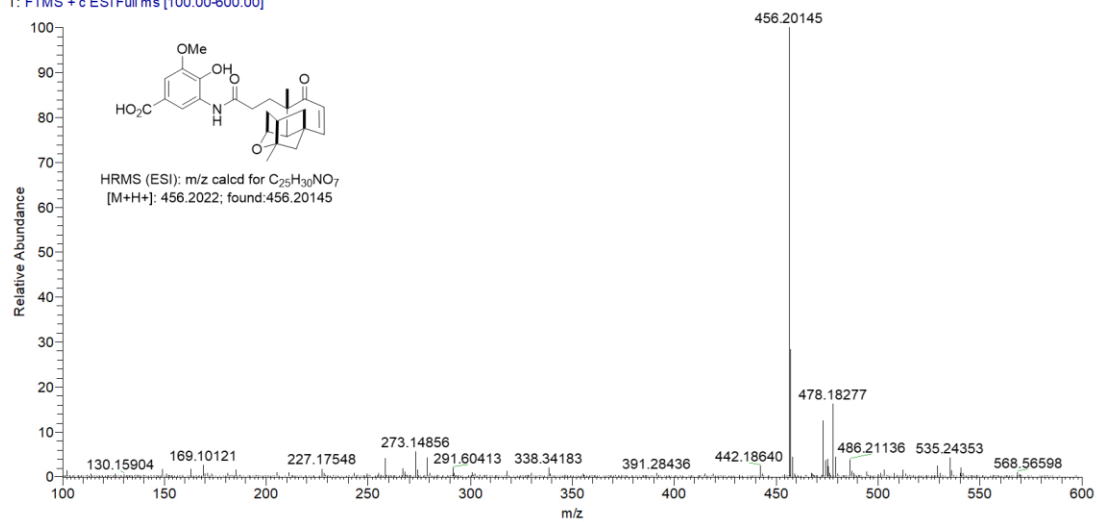

**Figure S69.** HRMS spectrum of **29c**

28 K7 4,6 OH PTM #15 RT: 0.13 AV: 1 NL: 2.17E7  
T: FTMS + c ESI Full ms [100.00-600.00]

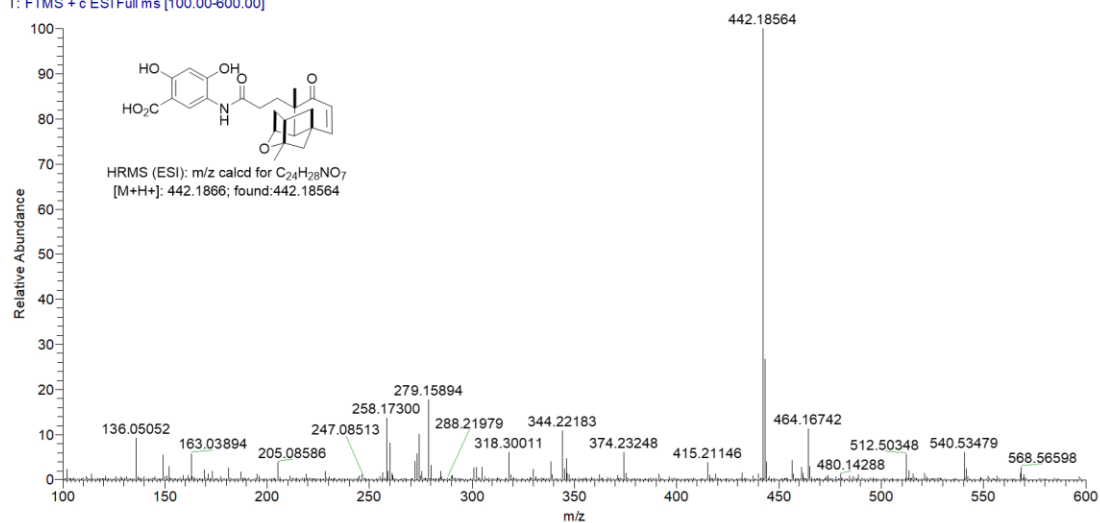

**Figure S70.** HRMS spectrum of **5**

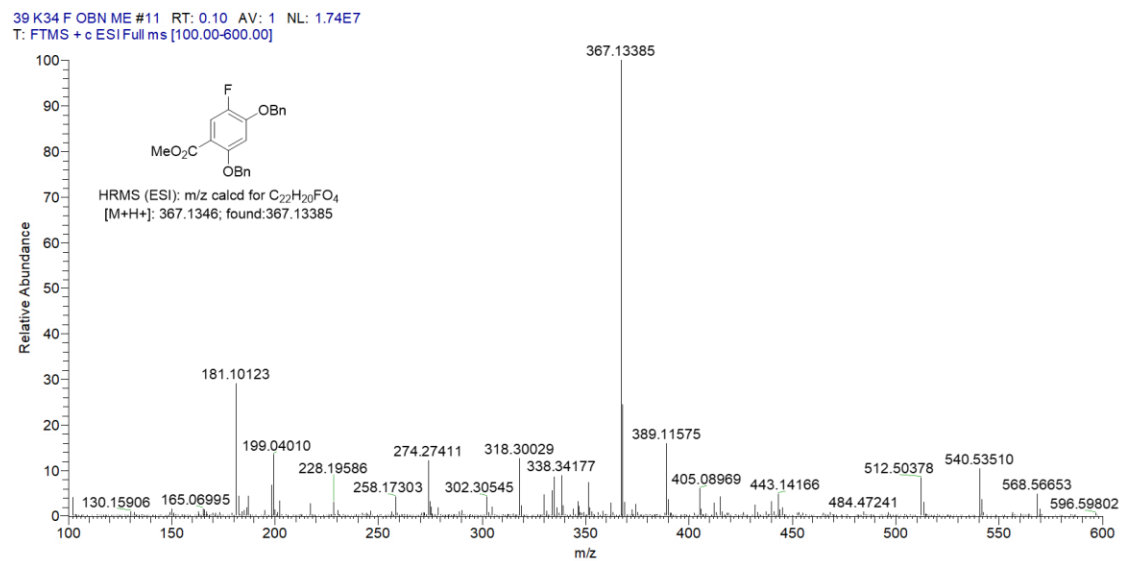

**Figure S71.** HRMS spectrum of **6**

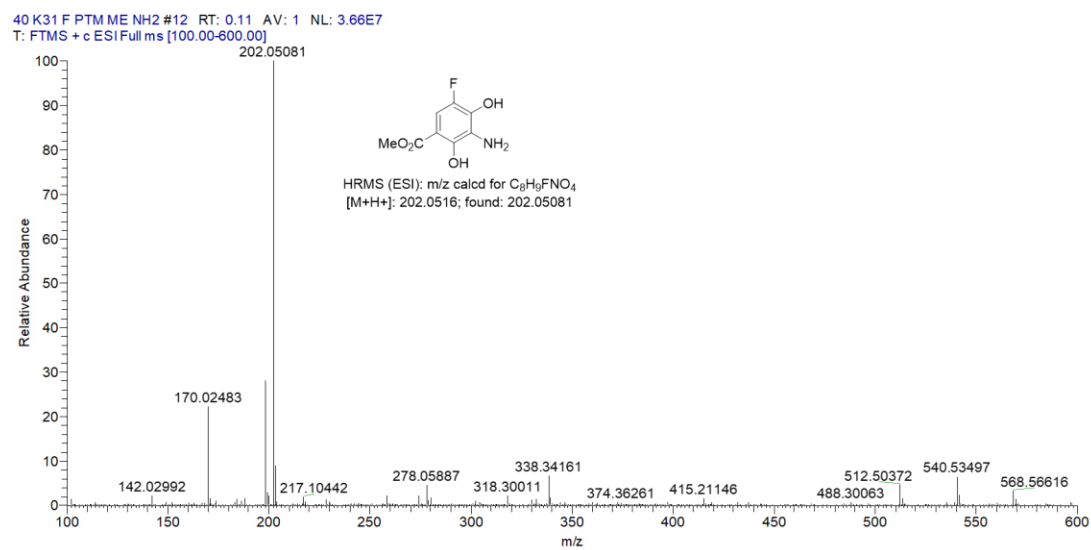

Figure S72. HRMS spectrum of 13

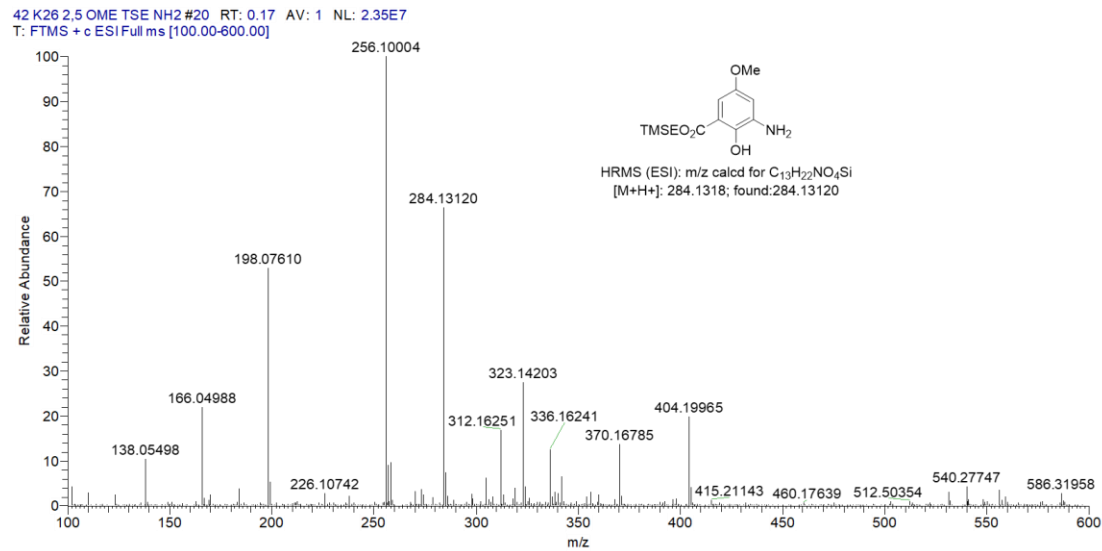

Figure S73. HRMS spectrum of 15a

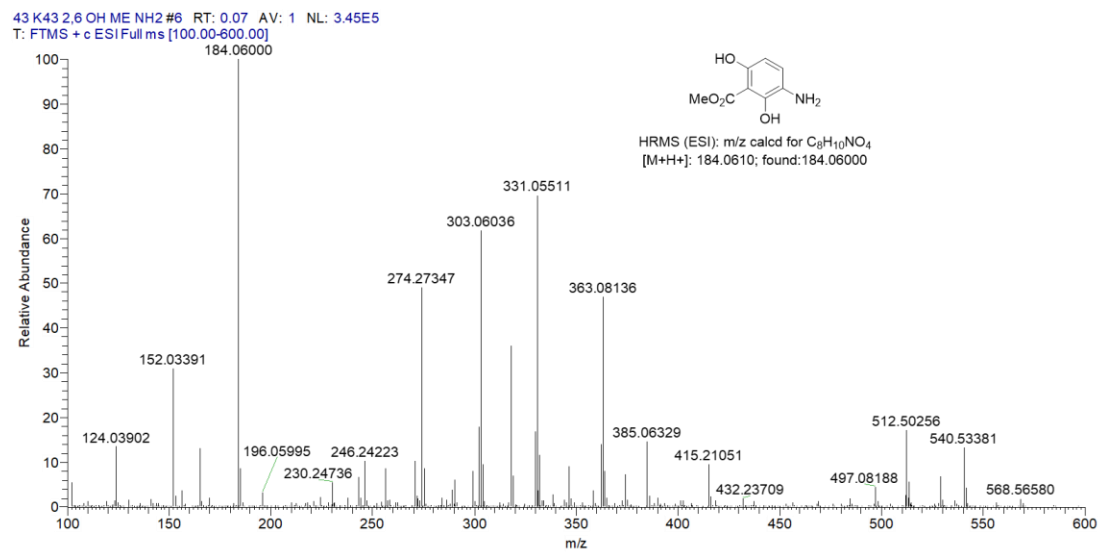

**Figure S74.** HRMS spectrum of **15b**

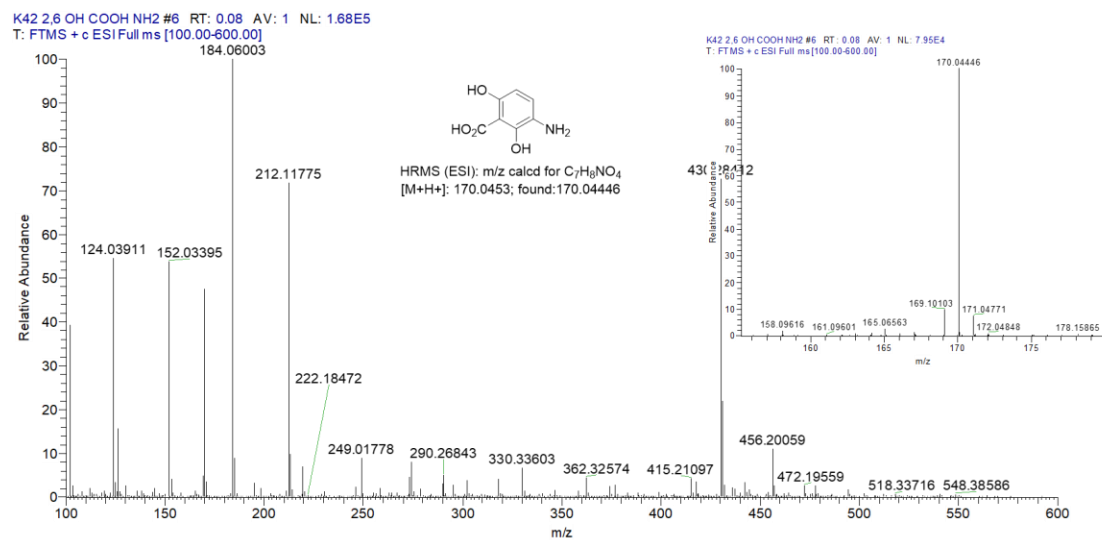

**Figure S75.** HRMS spectrum of **17a**

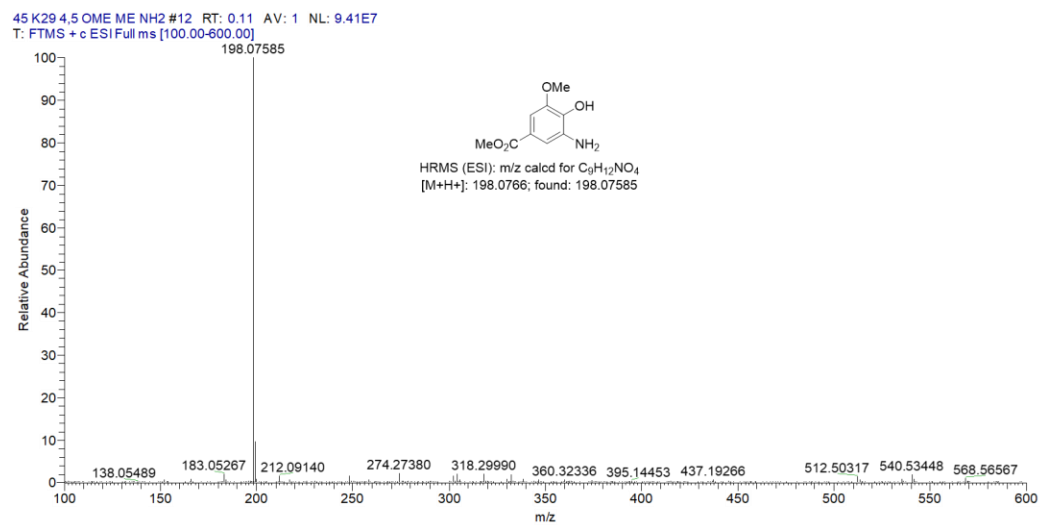

**Figure S76.** HRMS spectrum of **17b**

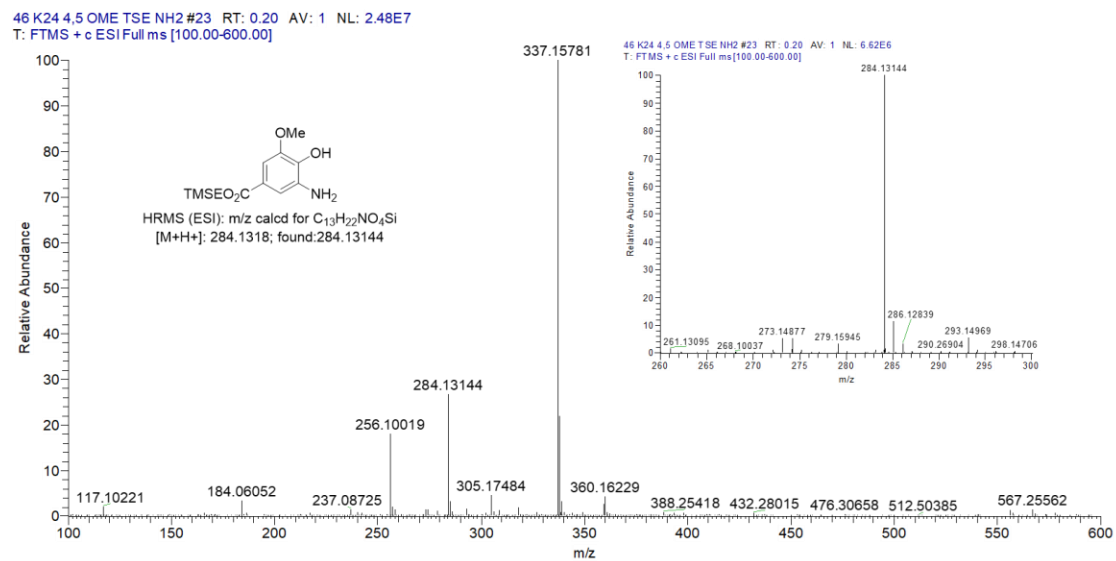

**Figure S77.** HRMS spectrum of **19**

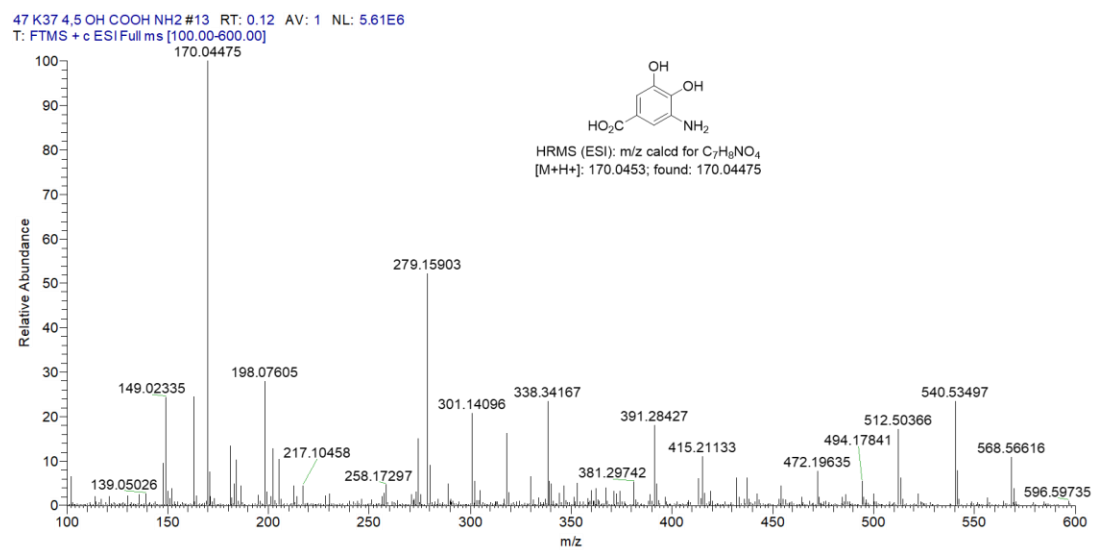

**Figure S78.** HRMS spectrum of **21a**

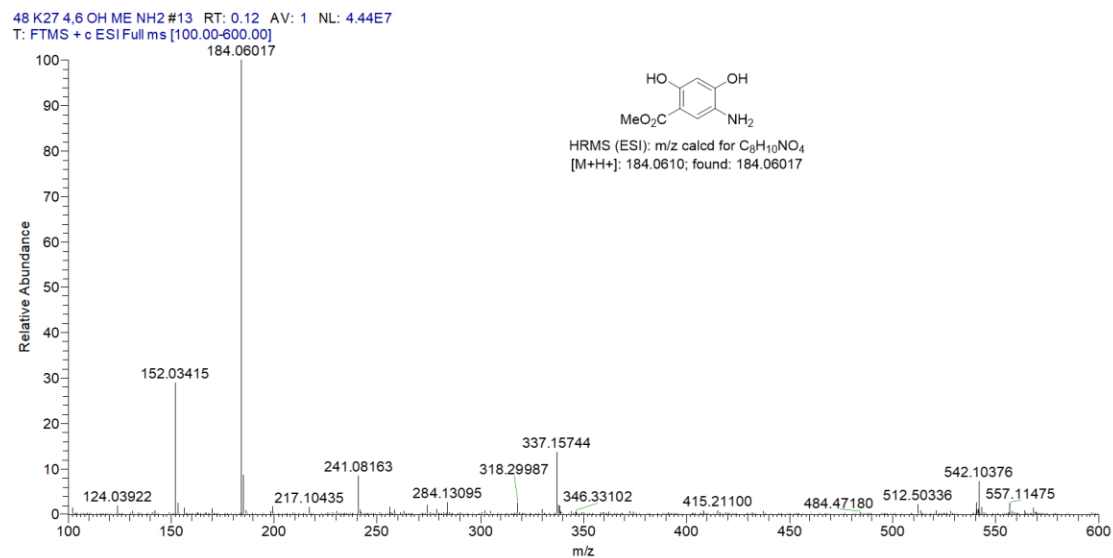

**Figure S79.** HRMS spectrum of **21b**

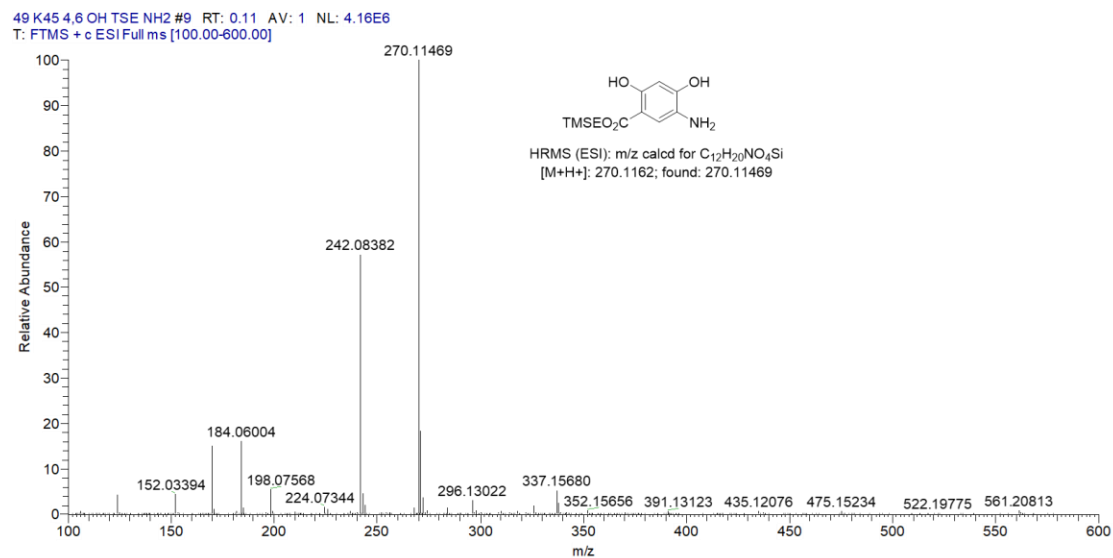



**Figure S80.** HRMS spectrum of **24**

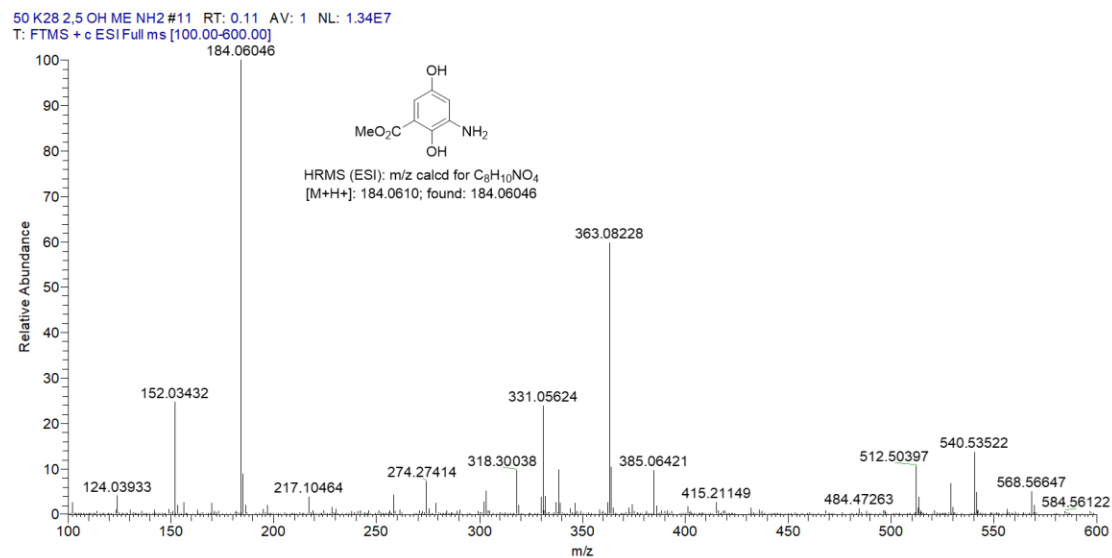

**Figure S81.** HRMS spectrum of **s-4f**

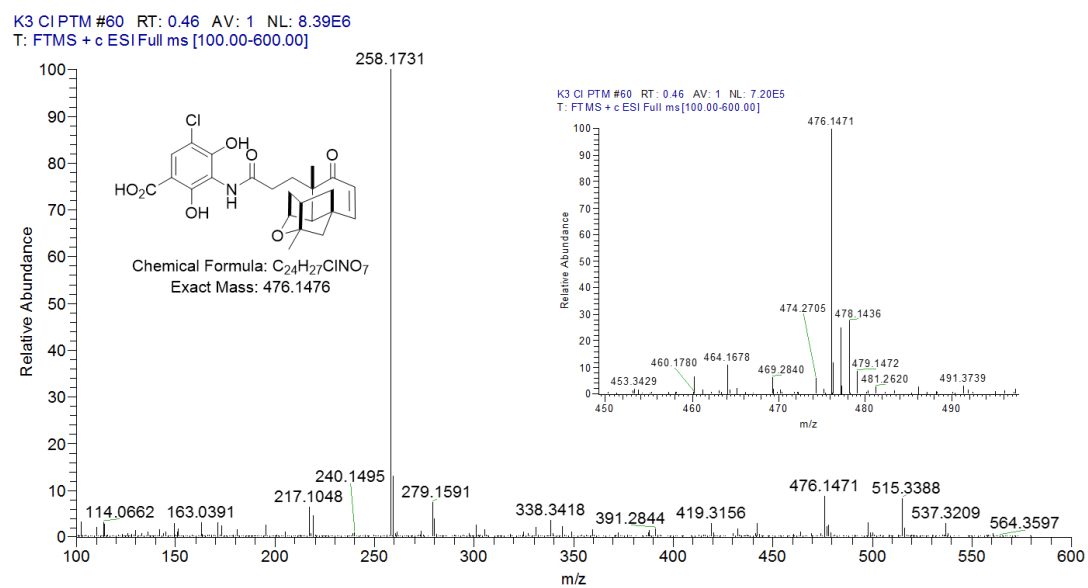

Figure S82. HRMS spectrum of s-4h

K4 Br PTM #25 RT: 0.18 AV: 1 NL: 7.06E6  
T: FTMS + c ESI Full ms [100.00-600.00]

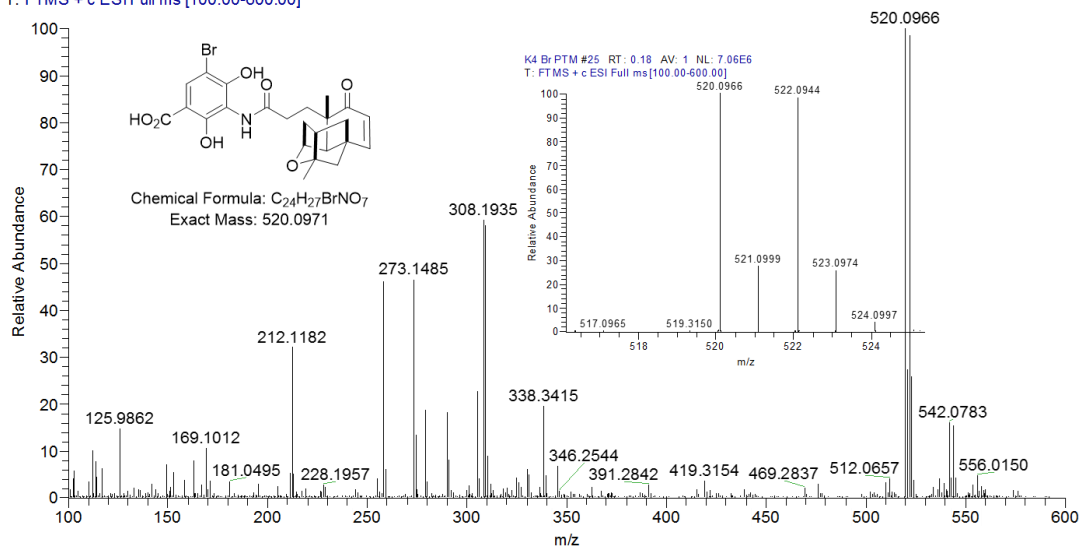

Supplement: NIHMS1579285-supplement-SI.pdf [file NIHMS1579285-supplement-SI.pdf]
